# Supplementary material
Source: publisher figshare collection journal article supplement (https://future-science-group.figshare.com/articles/dataset/_/19180970)
Supplement: Supplementary file 1 [file 1]

## Sheet: Supplementary Table 1
			Nanodrop 2000				DNA Qubit		RNA Qubit		Tape Station
Sample ID	GENEWIZ ID	Sample Vol.(ul)	Actual Nucleic conc. (ng/ul)	Total Amount(ng)	A260/A280	A260/A230	Actual Nucleic conc. (ng/ul)	Total Amount(ng)	Actual Nucleic conc. (ng/ul)	Total Amount(ng)	Average Size for DNA	RIN for RNA	DV 200 (for RNA)
A1	SCE6973	28	NA	NA	NA	NA	NA	NA	494.1	13834.8	NA	6.2	90.01
A2	SCE6974	28	NA	NA	NA	NA	NA	NA	411.9	11533.2	NA	6.8	85.06
A3	SCE6975	28	NA	NA	NA	NA	NA	NA	332.9	9321.2	NA	7	87.77
A5	SCE6977	28	NA	NA	NA	NA	NA	NA	371.3	10396.4	NA	8.9	87.36
B1	SCE6979	27	NA	NA	NA	NA	NA	NA	230.6	6226.2	NA	9.8	96.13
B2	SCE6980	28	NA	NA	NA	NA	NA	NA	321.9	9013.2	NA	9.1	86.61
B3	SCE6981	28	NA	NA	NA	NA	NA	NA	308.5	8638	NA	9	82.43
B5	SCE6983	28	NA	NA	NA	NA	NA	NA	228.7	6403.6	NA	9.1	76.67
C1	SCE6985	26	NA	NA	NA	NA	NA	NA	234.3	6091.8	NA	9.8	95.6
C2	SCE6986	27	NA	NA	NA	NA	NA	NA	268.7	7254.9	NA	9	84.53
C3	SCE6987	28	NA	NA	NA	NA	NA	NA	276.9	7753.2	NA	9	79.17
C5	SCE6989	27	NA	NA	NA	NA	NA	NA	163	4401	NA	9.1	77.79

## Sheet: Supplementary Table 2
Sample ID	Sample Names	Barcode Sequence	# Reads	Yield (Mbases)	Mean Quality Score	% Bases >= 30
smallrna-A1	Control 1	ATCACG	15226983	1523	38.28	93.09
smallrna-A2	HIV-1 Tat 1	CGATGT	17495869	1750	38.3	93.16
smallrna-A3	Cocaine 1	TTAGGC	16891764	1689	38.18	92.73
smallrna-A5	HIV-1 Tat + Cocaine - 1	ACAGTG	15347056	1535	38.28	93.1
smallrna-B1	Control 2	CAGATC	16711238	1671	38.25	92.99
smallrna-B2	HIV-1 Tat 2	ACTTGA	14203810	1420	38.3	93.18
smallrna-B3	Cocaine 2	GATCAG	16222355	1622	38.28	93.1
smallrna-B5	HIV-1 Tat + Cocaine - 2	GGCTAC	18116216	1812	38.23	92.9
smallrna-C1	Control 3	AGTCAA	15327096	1533	38.33	93.27
smallrna-C2	HIV-1 Tat 3	AGTTCC	14418195	1442	38.22	92.88
smallrna-C3	Cocaine 3	ATGTCA	13370584	1337	38.27	93.09
smallrna-C5	HIV-1 Tat + Cocaine - 3	GTAGAG	16937659	1694	38.3	93.15
			1.58557e+07

## Sheet: Supplementary Table 3
				control						HIV-1 Tat					Cocaine					Tat + Cocaine
			Locus	Chromosome:Start-End	Avg. TPM				Locus	Chromosome:Start-End	Avg. TPM			Locus	Chromosome:Start-End	Avg. TPM			Locus	Chromosome:Start-End	Avg. TPM
			cluster68	chr1:146031003-146043999	1100.45				cluster68	chr1:146031003-146043999	817.21			cluster68	chr1:146031003-146043999	1022.09			cluster68	chr1:146031003-146043999	853.81
			cluster108	chr1:248869973-248878468	10.1167				cluster108	chr1:248869973-248878468	9.30667			cluster108	chr1:248869973-248878468	8.80333			cluster108	chr1:248869973-248878468	6.355
			cluster179	chr11:123055569-123063422	1109.31				cluster179	chr11:123055569-123063422	994.347			cluster179	chr11:123055569-123063422	1046.37			cluster179	chr11:123055569-123063422	1089.93
			cluster222	chr12:124909006-124915966	9.45667				cluster161	chr11:61961037-61969916	6.29667			cluster161	chr11:61961037-61969916	7.73			cluster222	chr12:124909006-124915966	5.45
			cluster246	chr14:19381072-19405021	7.45				cluster222	chr12:124909006-124915966	7.73333			cluster222	chr12:124909006-124915966	5.47			cluster246	chr14:19381072-19405021	6.855
			cluster482	chr17:81506001-81516944	14.6267				cluster246	chr14:19381072-19405021	6.25667			cluster246	chr14:19381072-19405021	5.67333			cluster482	chr17:81506001-81516944	11.2967
			cluster591	chr2:106694160-106701889	14.86				cluster482	chr17:81506001-81516944	14.0633			cluster482	chr17:81506001-81516944	15.0167			cluster412	chr17:8183017-8191621	5.665
			cluster602	chr2:121526919-121535029	41.2				cluster412	chr17:8183017-8191621	5.67			cluster412	chr17:8183017-8191621	5.71			cluster500	chr19:1267293-1278023	9.36
			cluster605	chr2:130023015-130077019	8.35333				cluster591	chr2:106694160-106701889	18.1433			cluster500	chr19:1267293-1278023	4.85			cluster591	chr2:106694160-106701889	12.61
			cluster613	chr2:131623014-131639018	8.1				cluster602	chr2:121526919-121535029	40.1367			cluster591	chr2:106694160-106701889	22.5467			cluster602	chr2:121526919-121535029	45.105
			cluster688	chr22:15719148-15739970	7.02333				cluster605	chr2:130023015-130077019	6.40333			cluster602	chr2:121526919-121535029	43.4			cluster605	chr2:130023015-130077019	6.975
			cluster837	chr5:172333111-172340025	7.47				cluster613	chr2:131623014-131639018	5.82667			cluster605	chr2:130023015-130077019	6.42333			cluster613	chr2:131623014-131639018	6.79
			cluster817	chr5:43493160-43498918	13.9833				cluster688	chr22:15719148-15739970	6.07333			cluster613	chr2:131623014-131639018	5.59333			cluster688	chr22:15719148-15739970	6.755
			cluster865	chr6:28978076-28986879	11.4433				cluster837	chr5:172333111-172340025	7.25667			cluster688	chr22:15719148-15739970	5.86			cluster837	chr5:172333111-172340025	5.515
			cluster887	chr6:85673186-85682019	34.3967				cluster817	chr5:43493160-43498918	16.9733			cluster817	chr5:43493160-43498918	19.9467			cluster817	chr5:43493160-43498918	14.44
			cluster1057	chr9:127442001-127450929	6.44				cluster887	chr6:85673186-85682019	30.76			cluster865	chr6:28978076-28986879	7.54667			cluster887	chr6:85673186-85682019	31.53
			cluster997	chr9:14430615-14436938	1093.12				cluster997	chr9:14430615-14436938	812.557			cluster887	chr6:85673186-85682019	32.8633			cluster997	chr9:14430615-14436938	593.033
														cluster1057	chr9:127442001-127450929	5.71333
														cluster997	chr9:14430615-14436938	1016.56
				Locus	Chromosome:Start-End	control	HIV-1 Tat	Cocaine	Tat + Cocaine
				cluster68	chr1:146031003-146043999	1100.45	582.667	1022.09	853.81
				cluster108	chr1:248869973-248878468	10.1167	9.30667	8.80333	6.355
				cluster179	chr11:123055569-123063422	1109.31	994.347	1046.37	1089.93
				cluster222	chr12:124909006-124915966	9.45667	7.73333	5.47	5.45
				cluster246	chr14:19381072-19405021	7.45	6.25667	5.67333	6.855
				cluster482	chr17:81506001-81516944	14.6267	5.67	15.0167	11.2967
				cluster591	chr2:106694160-106701889	14.86	18.1433	22.5467	12.61
				cluster602	chr2:121526919-121535029	41.2	40.1367	43.4	45.105
				cluster605	chr2:130023015-130077019	8.35333	6.40333	6.42333	6.975
				cluster613	chr2:131623014-131639018	8.1	5.82667	5.59333	6.79
				cluster688	chr22:15719148-15739970	7.02333	6.07333	5.86	6.755
				cluster837	chr5:172333111-172340025	7.47	7.25667	6.435	5.515
				cluster817	chr5:43493160-43498918	13.9833	6.07333	19.9467	14.44
				cluster865	chr6:28978076-28986879	11.4433	16.9733	7.54667	9.1245
				cluster887	chr6:85673186-85682019	34.3967	30.76	32.8633	31.53
				cluster1057	chr9:127442001-127450929	6.44	5.9214	5.71333	5.12
				cluster997	chr9:14430615-14436938	1093.12	812.557	1016.56	593.033

## Sheet: Supplementary Table 4
Sample ID	Sample Names	Number of trimmed reads used for mapping			Sample ID	Sample Names	Percentage of mapping to Human genome
smallrna-A1	Control 1	14009072			smallrna-A1	Control 1	82.75
smallrna-A2	HIV-1 Tat 1	16133420			smallrna-A2	HIV-1 Tat 1	83.89
smallrna-A3	Cocaine 1	15521472			smallrna-A3	Cocaine 1	81.98
smallrna-A5	HIV-1 Tat + Cocaine - 1	14211359			smallrna-A5	HIV-1 Tat + Cocaine - 1	82.43
smallrna-B1	Control 2	13039989			smallrna-B1	Control 2	78.68
smallrna-B2	HIV-1 Tat 2	5982432			smallrna-B2	HIV-1 Tat 2	84.11
smallrna-B3	Cocaine 2	14898363			smallrna-B3	Cocaine 2	80.87
smallrna-B5	HIV-1 Tat + Cocaine - 2	16803059			smallrna-B5	HIV-1 Tat + Cocaine - 2	80.58
smallrna-C1	Control 3	13874173			smallrna-C1	Control 3	85.87
smallrna-C2	HIV-1 Tat 3	13158480			smallrna-C2	HIV-1 Tat 3	82.6
smallrna-C3	Cocaine 3	12097492			smallrna-C3	Cocaine 3	84.59
smallrna-C5	HIV-1 Tat + Cocaine - 3	15348995			smallrna-C5	HIV-1 Tat + Cocaine - 3	82.53
	Average	1.37565e+07				Average	82.5733

## Sheet: Common piRNAs- 7A
Names	total	elements
CTRL	VS	COCAINE	CTRL	VS	HIV	CTRL	VS	TC	27	hsa-piR-2452
	hsa-piR-20118
	hsa-piR-18961
	hsa-piR-22273
	hsa-piR-5931
	hsa-piR-5441
	hsa-piR-12301
	hsa-piR-6988
	hsa-piR-21905
	hsa-piR-26069
	hsa-piR-13393
	hsa-piR-32954
	hsa-piR-1510
	hsa-piR-11298
	hsa-piR-30366
	hsa-piR-9062
	hsa-piR-4707
	hsa-piR-30073
	hsa-piR-10185
	hsa-piR-32723
	hsa-piR-7480
	hsa-piR-18170
	hsa-piR-18257
	hsa-piR-29889
	hsa-piR-28778
	hsa-piR-15942
	hsa-piR-18337
CTRL	VS	COCAINE	CTRL	VS	HIV	15	hsa-piR-15414
	hsa-piR-33102
	hsa-piR-25265
	hsa-piR-13017
	hsa-piR-29146
	hsa-piR-1268
	hsa-piR-26185
	hsa-piR-30738
	hsa-piR-16314
	hsa-piR-10198
	hsa-piR-1138
	hsa-piR-21284
	hsa-piR-23574
	hsa-piR-1426
	hsa-piR-16829
CTRL	VS	HIV	CTRL	VS	TC	32	hsa-piR-32953
	hsa-piR-20117
	hsa-piR-31363
	hsa-piR-33195
	hsa-piR-25513
	hsa-piR-33201
	hsa-piR-20437
	hsa-piR-25490
	hsa-piR-573
	hsa-piR-12515
	hsa-piR-2324
	hsa-piR-22385
	hsa-piR-15656
	hsa-piR-18632
	hsa-piR-4775
	hsa-piR-11708
	hsa-piR-19859
	hsa-piR-13284
	hsa-piR-20818
	hsa-piR-8604
	hsa-piR-17568
	hsa-piR-10349
	hsa-piR-23629
	hsa-piR-20171
	hsa-piR-23408
	hsa-piR-3376
	hsa-piR-17016
	hsa-piR-9026
	hsa-piR-5075
	hsa-piR-18626
	hsa-piR-31121
	hsa-piR-3375
CTRL	VS	COCAINE	CTRL	VS	TC	18	hsa-piR-29994
	hsa-piR-30584
	hsa-piR-2086
	hsa-piR-25556
	hsa-piR-797
	hsa-piR-4589
	hsa-piR-28610
	hsa-piR-29048
	hsa-piR-9302
	hsa-piR-31994
	hsa-piR-25077
	hsa-piR-13828
	hsa-piR-32635
	hsa-piR-7908
	hsa-piR-29906
	hsa-piR-21273
	hsa-piR-29454
	hsa-piR-7447
CTRL	VS	HIV	53	hsa-piR-32828
	hsa-piR-33116
	hsa-piR-18073
	hsa-piR-25663
	hsa-piR-3370
	hsa-piR-23706
	hsa-piR-932
	hsa-piR-8292
	hsa-piR-33016
	hsa-piR-20110
	hsa-piR-23581
	hsa-piR-1336
	hsa-piR-11379
	hsa-piR-25624
	hsa-piR-26933
	hsa-piR-19427
	hsa-piR-14657
	hsa-piR-6916
	hsa-piR-2752
	hsa-piR-11384
	hsa-piR-28282
	hsa-piR-12903
	hsa-piR-28115
	hsa-piR-4569
	hsa-piR-33031
	hsa-piR-18020
	hsa-piR-28727
	hsa-piR-19995
	hsa-piR-1476
	hsa-piR-11637
	hsa-piR-19465
	hsa-piR-24874
	hsa-piR-1928
	hsa-piR-20119
	hsa-piR-13644
	hsa-piR-32918
	hsa-piR-14290
	hsa-piR-10337
	hsa-piR-28901
	hsa-piR-30374
	hsa-piR-7332
	hsa-piR-25424
	hsa-piR-25000
	hsa-piR-29917
	hsa-piR-16795
	hsa-piR-12488
	hsa-piR-9716
	hsa-piR-23127
	hsa-piR-33091
	hsa-piR-5073
	hsa-piR-5746
	hsa-piR-32829
	hsa-piR-3501
CTRL	VS	COCAINE	28	hsa-piR-28388
	hsa-piR-29039
	hsa-piR-29866
	hsa-piR-16153
	hsa-piR-27751
	hsa-piR-24961
	hsa-piR-25199
	hsa-piR-4198
	hsa-piR-18998
	hsa-piR-29678
	hsa-piR-9187
	hsa-piR-8654
	hsa-piR-7850
	hsa-piR-15182
	hsa-piR-30200
	hsa-piR-15472
	hsa-piR-30027
	hsa-piR-2401
	hsa-piR-22292
	hsa-piR-6834
	hsa-piR-31560
	hsa-piR-10301
	hsa-piR-20941
	hsa-piR-6321
	hsa-piR-11399
	hsa-piR-11876
	hsa-piR-5240
	hsa-piR-31880
CTRL	VS	TC	37	hsa-piR-15300
	hsa-piR-20858
	hsa-piR-24572
	hsa-piR-31902
	hsa-piR-16271
	hsa-piR-22188
	hsa-piR-33067
	hsa-piR-18630
	hsa-piR-4676
	hsa-piR-10194
	hsa-piR-19890
	hsa-piR-18105
	hsa-piR-33131
	hsa-piR-16186
	hsa-piR-10303
	hsa-piR-22181
	hsa-piR-23491
	hsa-piR-26307
	hsa-piR-20065
	hsa-piR-19735
	hsa-piR-9137
	hsa-piR-15387
	hsa-piR-5559
	hsa-piR-7233
	hsa-piR-24027
	hsa-piR-18837
	hsa-piR-1999
	hsa-piR-9071
	hsa-piR-19812
	hsa-piR-32501
	hsa-piR-13685
	hsa-piR-28262
	hsa-piR-23468
	hsa-piR-20509
	hsa-piR-27694
	hsa-piR-11707
	hsa-piR-5193

## Sheet: Common gene targets of piRNA-7B
Names	total	elements
CTRL	VS	COCAINE	CTRL	VS	HIV	CTRL	VS	TC	42	FRAS1
	LOC101926889
	ABL2
	NPY6R
	SLC35D2
	LOC101927374
	LOC101927575
	TMEM212
	KCNQ1OT1
	UGDH-AS1
	LINC01266
	KIR3DX1
	NKAIN3-IT1
	XAF1
	ROR1-AS1
	ZNF124
	LINC01194
	LINC00507
	CCDC144A
	RDH16
	C1QTNF9
	LOC100131257
	SOX9-AS1
	LINC01949
	LINC00504
	LINC00276
	LINC02141
	POTEC
	TNPO1
	CCDC144B
	LINC00342
	LOC100129434
	CD70
	LOC101926898
	CA5B
	CFLAR
	LINC02444
	KANTR
	CLEC12A-AS1
	LINC00506
	LINC00410
	CYYR1-AS1
CTRL	VS	COCAINE	CTRL	VS	HIV	1	SEC24C
CTRL	VS	HIV	CTRL	VS	TC	70	LOC283856
	LINC00670
	C2orf91
	ZNF66
	ENOX2
	PRORY
	ARHGEF26-AS1
	LOC286437
	LILRB4
	LINC00381
	IGSF11
	CASC6
	MGC27345
	WARS2-AS1
	EPPIN
	DTNB
	PATE2
	TMEM241
	CHIAP2
	XKR9
	GPR141
	MCFD2
	ACBD7
	C1QTNF7
	CD83
	SMC2-AS1
	PGM5P2
	RASAL2-AS1
	LINC01814
	GOSR1
	LOC101928131
	GBP4
	LOC101928118
	LOC101928936
	LOC101928739
	ABCC9
	LOC101929415
	PARP15
	EIF4E
	LINC00674
	NUDT9
	LOC102724532
	ZIM2-AS1
	SEM1
	LOC646214
	TCAF2
	ANKRD62P1-PARP4
	LINC00858
	SHISA9
	SPC25
	ZNF616
	ADH4
	LINC01684
	GLIPR1L2
	TSPAN6
	ENTPD1
	RABL3
	LSAMP-AS1
	POU6F2-AS2
	LINC02071
	ZKSCAN3
	SBF2-AS1
	ORC4
	LINC02108
	TTPA
	NXPE3
	LINC01873
	LINC01489
	KLRD1
	CCDC9
CTRL	VS	COCAINE	CTRL	VS	TC	29	LINC02073
	NXNL2
	CD8B2
	LOC100419170
	CHMP1B2P
	TEX13D
	LLPH-DT
	LINC02261
	TCTN1
	LOC389834
	ZNF480
	PITPNM2
	ARRDC3-AS1
	TRIM4
	LINC00365
	LOC728752
	SSR2
	SETDB2
	PTCHD4
	MYHAS
	ZNF37BP
	GSG1
	LOC105370802
	MIR4713HG
	SMG1P7
	LOC105370361
	LOC101928103
	SEPSECS-AS1
	BHLHE40-AS1
CTRL	VS	HIV	1027	LOC101929295
	HAUS2
	EML2-AS1
	LINC01284
	PIGX
	ZHX3
	TMEM130
	ZNF554
	SLC4A1
	SOX7
	GLTP
	FGL2
	CUBN
	C9orf78
	HERPUD2
	TRAF3IP2
	POLK
	MEF2C-AS1
	MDFIC
	ATP5MF-PTCD1
	PRDM14
	BOLA3-AS1
	LINC01279
	SLC6A11
	CYCS
	CNGB1
	RAB42
	GPSM2
	SIRPB2
	ITIH5
	C2orf49
	TRIM74
	SLC25A37
	SLC6A4
	NWD1
	SEC1P
	CLHC1
	PNPT1
	C9orf85
	TOP3A
	PHLDA3
	RNF14
	SLC15A2
	RAB3IP
	FGFR1
	NOSIP
	IRF1
	ZNF248
	INIP
	DOP1B
	ZNF208
	FAM20A
	SPN
	GSTCD
	CASP6
	RPL36A
	IPO9
	LOC102723566
	COX14
	RRP7A
	MYO3B
	KDELC2
	PTCD3
	CEP135
	TMEM184A
	TCEANC2
	RHOT1
	TRPM8
	TIGD6
	MRI1
	AKR1B10
	LINC01360
	HOOK3
	TMEM19
	NOM1
	CLN8
	LINC01744
	HNMT
	PCGF3
	RNF141
	DNAJC22
	NOS1
	LOC101929259
	LINC01772
	APOBR
	LINC02249
	ZNF723
	EIF3J-DT
	FAAHP1
	PHF20
	MAP3K20
	HNF1A-AS1
	ZNF197
	MTHFR
	MAN2A2
	PWARSN
	ZFP14
	CCDC92B
	BISPR
	TRIM60
	ZNF660-ZNF197
	LOC100506476
	YARS2
	SSTR2
	LINC01429
	DGKH
	CHRNA5
	LINC00482
	CES2
	LINC01934
	TMEM267
	NEIL1
	FITM2
	SPIRE2
	ZNF43
	BORCS7
	NKD1
	RAD23B
	RPL7L1
	SIAH3
	TNFRSF9
	LOC101928489
	GTF2H2
	EXOSC2
	FBLIM1
	ZNF749
	GIMAP1
	METTL2B
	HRH4
	CASP10
	TNFRSF14-AS1
	LOC283299
	MYO1C
	FRRS1L
	RBM23
	ZNF154
	C9orf139
	TPM3
	F2RL1
	LOC100996351
	ATP2C2-AS1
	CCAR1
	APOC4
	KLHL36
	USP49
	TFCP2L1
	YEATS2
	RASA4DP
	ACBD5
	SEMA3E
	TUBB
	CEACAM22P
	LINC01653
	BCLAF3
	C8orf44-SGK3
	LRRC58
	YME1L1
	CEBPB-AS1
	MAP3K13
	COPA
	FBXL19-AS1
	LOC647070
	ARFGEF3
	KIF11
	PART1
	ADI1
	MRPS11
	SLC2A3
	PHC3
	ACOX1
	QPRT
	ERLIN2
	TMEM233
	FAXC
	SH3GLB1
	SLC12A6
	AICDA
	FKRP
	ZNF534
	PAG1
	CXorf56
	PCAT5
	GCK
	LOC107984703
	LOC100506544
	FLJ42627
	ZNF665
	POLR2J4
	TLR6
	RBM26-AS1
	LARS
	TMEM59
	RCSD1
	PDE4C
	RUNDC3A-AS1
	FKBP14
	FGD4
	GSN-AS1
	LINC00958
	CHST6
	MEAK7
	KCNE3
	ATG10
	LOC100134868
	PTGES3
	BACE2
	ZBED1
	LINC01857
	KIAA0355
	LINC00649
	PTRH1
	IKZF3
	NDUFAF6
	ZNF549
	RSKR
	EPHA1-AS1
	POU6F1
	LRRC69
	PLEKHG2
	LINC01356
	PRRG4
	IL6R
	GRIN2C
	BAG1
	MIR1-1HG-AS1
	MOB4
	MMAB
	OSER1-DT
	RNF144A
	NEAT1
	LOC101926915
	ZNF320
	HMGB3P1
	VPS41
	MPV17L
	FIRRE
	C11orf58
	EPGN
	NPHS1
	TMED9
	TSN
	ENAH
	EHD4-AS1
	ZNF527
	PRR5
	AHCY
	CROT
	ZNF432
	ZNF366
	KIAA0586
	IL27RA
	PBLD
	LOC100130111
	LOC101927666
	ZNF566
	ZNF425
	RSU1
	FAM126B
	LOC100131496
	RBPMS
	TNK2-AS1
	MAGT1
	TAMM41
	GPR132
	PIK3C2A
	LINC01725
	OPA3
	MAP2K6
	RPS6KA6
	MED18
	ECE1
	SHANK2-AS3
	LOC339059
	BCL2L15
	TMEM25
	MANSC4
	ERN2
	LOC102724719
	C17orf75
	ZNF738
	PEAK1
	LOC101929698
	LOC729652
	RASA4
	HTR3B
	TPT1
	VWA2
	BASP1-AS1
	VSTM4
	AKIRIN1
	FHDC1
	ZNF107
	UBE2L5
	TTC24
	SLC4A5
	NCRUPAR
	CHRNB1
	IFT22
	RILPL1
	RAD1
	TLL2
	C12orf65
	LOC102724927
	QPCTL
	VTI1A
	LYST
	GRM6
	LMCD1-AS1
	LINC01754
	ARL10
	MPV17L2
	LRRC2
	WWC1
	WDR91
	VSIG1
	CWF19L1
	PAWR
	SULT1A1
	MTMR12
	AKR7A2
	LDLR
	ASTN2
	FAM177A1
	DSTYK
	GATAD1
	FAM9B
	DBT
	LINC01530
	LOC101927588
	NAIP
	UQCRB
	KLHL28
	BEST1
	TMIGD2
	PEX13
	SGTB
	HELZ2
	COX20
	XKR5
	MARVELD3
	CRCP
	ZNF264
	ARHGEF39
	DCAF11
	PQLC2
	PLIN3
	GTF2H5
	PANK1
	PLEKHM3
	ZFP30
	DMBT1P1
	MIR17HG
	ZNF578
	JRK
	OLMALINC
	ICA1L
	XIAP
	TCTA
	PRKX
	LOC284577
	NUDT14
	RAB11FIP4
	BMP7
	PCYOX1
	LINC01902
	LOC100288748
	EMX2OS
	B3GALT5-AS1
	FAM168B
	CPM
	ATXN3
	LOC100506548
	ILF3-DT
	GATD1
	GTF2H2B
	INPP5B
	PAK3
	TRIM56
	IL21R
	TCFL5
	MIR1285-2
	LOC100128573
	UACA
	SLC7A5P2
	NDUFAF7
	DHTKD1
	LOC100507516
	ZNF546
	ZNF101
	EAF1
	GK5
	LINC01887
	LOC100506472
	IQCG
	ANKRD54
	ZNF136
	CENPBD1
	IL15
	ZNF818P
	CYB5D2
	ZNF565
	PRF1
	SRGAP2C
	CDK4
	OSTM1
	ABCB5
	THG1L
	LCTL
	PTPN14
	GPRC5D-AS1
	RBM3
	GPR1
	BMS1
	IL6R-AS1
	ALDH7A1
	ZNF514
	CDHR3
	ZKSCAN1
	FAM153C
	SNHG7
	METTL16
	ZKSCAN4
	CENPN
	ACP7
	GABPB1-IT1
	NMT2
	CENPC
	PFKM
	DKC1
	LOC101929340
	LINC01122
	ARMC10
	TGFB1
	DCUN1D2
	PBOV1
	PCF11-AS1
	ZNF780B
	SHANK2-AS1
	LINC00311
	AMACR
	KANK4
	VPS53
	IPO5P1
	OCIAD1
	ZNF713
	ZNF530
	ASMTL-AS1
	MIGA1
	C8orf34
	ARSA
	PIH1D3
	UBE2B
	GGT6
	LINC01993
	KIAA1841
	NUMBL
	ASAP1-IT2
	GASAL1
	ZNF621
	MAPK8IP2
	RSPH3
	RN7SL832P
	TPST2
	PYROXD1
	PRXL2A
	ACTG1P17
	DCAF16
	ACVR2B-AS1
	MAVS
	ZFP82
	LINC01235
	SOAT1
	APOBEC3F
	MR1
	ZNRF3-AS1
	DIS3
	TRMT9B
	HSDL1
	LINC00672
	RPL23AP64
	COA1
	MIEF1
	KIF1B
	LINC01978
	ZNF829
	LINC01111
	LOC284395
	TSPAN14
	ZNF696
	SNTB2
	WDR82
	PRR11
	PKP2
	FILIP1
	CEP104
	SAMD5
	ZBTB8A
	ZBTB46-AS1
	NFAM1
	CXorf38
	FKTN
	ALKBH4
	RBMY1D
	SMIM11B
	PTAR1
	SLC44A3-AS1
	MTMR9
	CPT2
	IVD
	SPRED3
	CD68
	ERVV-1
	HSD17B7P2
	CATSPER2P1
	LINC00632
	FAM84B
	ZFR2
	PLUT
	ELOC
	PPAN
	NDUFC2
	LINC01588
	NNT-AS1
	LOC101928283
	GALNT15
	C3orf62
	KCTD20
	LOC101929165
	SNAP29
	VDR
	PHAX
	GPR155
	WDR31
	M1AP
	LOC100507351
	PLCXD1
	FAM20B
	HES2
	GNL3L
	C9orf64
	PRKAA2
	TALAM1
	AP1S3
	ST3GAL2
	TRPM7
	CNNM1
	TMEM150C
	FCF1P2
	NIP7
	DFFA
	LINC00964
	MCPH1-AS1
	ANKRD16
	PECAM1
	ZNF174
	PPP1R12B
	ZNF555
	MKRN2OS
	TSIX
	DSC3
	TRAF6
	CCR6
	ZYG11B
	HSPE1-MOB4
	PPARA
	BPNT1
	SHE
	DNM1P46
	PIAS2
	IL2RA
	PPP5D1
	CRX
	LINC02172
	LINC01842
	C5orf63
	USP15
	CHM
	VKORC1L1
	BTNL8
	SLC31A1
	TPM4
	FLJ37453
	STX17
	CABP4
	CTNS
	GDNF
	SFXN1
	PCLAF
	YAF2
	SH3BP2
	DNASE2
	PXMP4
	LIAS
	LOC102723769
	LRRK1
	BEND2
	SLC30A8
	ICAM4
	NOL12
	ZNF430
	PCGF5
	ANKH
	WIPF2
	ARL17B
	APOPT1
	FOXRED2
	LILRB3
	CYP20A1
	TRIM73
	TMEM236
	LOC101927583
	NLN
	SPTY2D1
	MESTIT1
	ICMT
	ZNF815P
	AKT2
	RAB2B
	OR1F12
	KREMEN1
	GALNT6
	TRIM13
	C12orf43
	SLC25A4
	FFAR4
	TMED8
	ZC3H12D
	CACNG8
	SLC35E4
	METTL6
	GINS4
	TAF1
	SRSF10
	GPR161
	TRIM66
	RINL
	RAB3B
	ERBB3
	LNPK
	LL22NC03-63E9.3
	TYW5
	NUP58
	AP5B1
	RIOK2
	SRGAP2B
	CALU
	MOK
	NAAA
	KCNA3
	LINC02547
	PDP2
	COX18
	ENTPD4
	SRP14-AS1
	APOOL
	ARMC9
	LINC01635
	PAXIP1-AS1
	TRABD2A
	FLJ42102
	TMEM181
	LINC01105
	CCNG1
	ANKRD62
	GTF2IP23
	LINC02042
	RAB29
	GLUL
	DEGS1
	AP3M1
	UBOX5
	ANAPC16
	PHACTR2
	KLF17
	SLC35E1
	NUDC
	ZNF346
	ZNF14
	C1QTNF3-AMACR
	AP4S1
	ZNF426
	CSAD
	ZNF865
	C21orf62
	KLB
	PPP1R3E
	TSNARE1
	LOC112543491
	GTF3C4
	TNFRSF1B
	GBP6
	KIAA1549
	LINC01268
	PANO1
	TTF1
	CCL28
	CYP3A43
	FAM239B
	PDE7A
	SRD5A3
	LOC100506444
	TM2D2
	XPNPEP3
	NCAPD2
	MTDH
	UNC13A
	LINC01299
	SCIMP
	ZNF483
	LOC100144595
	DCP2
	OTUD6A
	SRD5A3-AS1
	SLC7A11-AS1
	TRIOBP
	KCNJ3
	GIN1
	C2
	NOP14
	TUBGCP4
	LOC100128310
	FER
	LINC00243
	SLC43A2
	SMIM11A
	SFTPB
	CYP2W1
	KIF1C
	TBX19
	HIPK1-AS1
	CXorf21
	CEP19
	HSH2D
	LOC101928231
	TSEN34
	GGCX
	SMIM14
	BTN2A3P
	PRKY
	LOC100506679
	TRIM52-AS1
	SLC26A2
	CAMK4
	DENND6A-DT
	ZNF34
	HHLA3
	CHST12
	LOC644215
	SIGLEC10
	JPT2
	LINC00909
	SLC24A1
	ZNF160
	FAM76A
	MINDY2
	CNIH4
	COL16A1
	GPX8
	PCDHB9
	STAU2-AS1
	LINC02210
	NFATC2IP
	LOC101928052
	DSG3
	NFKBIB
	TIMELESS
	NUP107
	MYOZ3
	LRRC8B
	RAB11FIP1
	CSNK1G1
	SNX22
	LOC100128494
	WAC-AS1
	ZCCHC8
	LINC01392
	LOC339803
	POLH
	RC3H2
	TBC1D22A
	TMEM87A
	KIAA1614
	DNM1P35
	LINC01550
	CMBL
	SEC14L6
	NRIP2
	SUGP2
	LOC654780
	DDX51
	MS4A7
	GNB5
	ZNF106
	IYD
	HAND2-AS1
	CYB5RL
	NR2C1
	LOC100507412
	ZNF470
	AKAP5
	IL4R
	PRMT9
	TAF8
	CCL5
	RBM41
	CLSPN
	PTAFR
	REL
	ICA1
	OXNAD1
	SMIM5
	CCDC157
	TM7SF3
	TMEM213
	CDH23
	ORAI2
	EXOG
	LOC100128288
	MED15P9
	C16orf87
	NT5C2
	NBR2
	FAM71F2
	KIF3A
	MCUR1
	C6orf132
	GXYLT1
	CSNK1G2-AS1
	PAICS
	KLK10
	RBBP5
	FTCDNL1
	LAMP2
	LINC00927
	DRAIC
	HBS1L
	CRK
	LOC101928844
	DENND4C
	ZNF431
	FAM227A
	PHKG1
	LINC02139
	MRPS21
	GCAT
	PATJ
	NCMAP
	MFSD4B
	SLC35E3
	GJC1
	MESD
	LINC02099
	UBIAD1
	FAM210B
	HILPDA
	TBC1D27P
	LINC00518
	ADAT1
	ADCY2
	RABGAP1L
	ZNF737
	SNRPD3
	PTCD1
	PRR7-AS1
	TMEM126B
	FZD3
	LDLRAD1
	LOC100128593
	CHURC1
	TIMM50
	APOC4-APOC2
	CUTALP
	FAM21EP
	LINC01551
	ATG12
	ZNF620
	OIP5-AS1
	ZIM3
	BLZF1
	SPACA6P-AS
	ORC6
	SS18L1
	LINC02245
	FDPSP2
	CARF
	UBR2
	ZNF789
	ECT2L
	LOC100130950
	LOC101927692
	SEMA5A
	LRRC28
	LOC440300
	TTPAL
	LINC00578
	C8orf49
	OR11A1
	TMEM132B
	RAMP2-AS1
	ZNF714
	LINC02177
	NIPAL1
	LINC00562
	BUD23
	ANKRD44-IT1
	IL11
	TCF7
	LOC103344931
	ZNF570
	TMEM192
	CLUAP1
	CBX5
	DNAL1
	FBXL18
	LINC01426
	LOC101928994
	LRRC57
	IDE
	ZNF433-AS1
	LOC101929767
	ZNF37A
	HTR2A
	STX16
	KCNJ5
	CDKN2AIPNL
	LRP2BP
	ZNF250
	ZNF860
	PLA2G12A
	LINC00907
	ZNFX1
	LOC100287846
	NCOA7
	CCP110
	LOC101928551
	PEX5L
	LOC100507006
	COMMD9
	HIP1
	RSL1D1
	SBNO1
	LOC101929057
	OLA1
	POLR2E
	MMP19
	LRCH3
	SGK3
	LYRM7
	ATCAY
	BCYRN1
	CRAMP1
	AGMAT
	PRKXP1
	PABPC1P2
	LINC01970
	SLC35E2A
	RRS1-AS1
	MCPH1
	RFLNB
	CES1P1
	TNFSF14
	POM121
	ZNF557
	MRPL30
	LOC100268168
	ZNF845
	ALG1
	C18orf61
	C9orf147
	ZP2
	NUP62
	KDSR
	SCAF11
	WNT7B
	PLXDC1
	HNRNPU
	TMEM168
	SERPINB12
	DLEU1
	DNAAF4
	SLC38A7
	ZNF33A
	PCED1B-AS1
	FGD6
	RASSF6
	SMG9
	IQCC
	LINC00581
	MRPS18B
	LINC00167
	CEBPZOS
	LRPAP1
	MAFF
	C21orf58
	IL1R1
	TMC7
	TNFRSF10D
	AGPAT4-IT1
	SF3B3
	LOC100131626
	SLC17A5
	ATP8B1
	PGPEP1
	LRIG2
	C11orf54
	LINC01521
	NDUFA5
	RBL1
	LOC107985820
	VHL
	SPC24
	RPS6KA3
	MAP3K9
	LOC105373044
	LINC02078
	C15orf40
	C1orf43
	MDM4
	SYAP1
	NLRC3
	SRSF12
	PDE12
	PMS2
	PSMA3-AS1
	RNASEH1
	ACTR3C
	PLA2G4E-AS1
CTRL	VS	COCAINE	1	TBCE
CTRL	VS	TC	43	LPP
	BRIX1
	LINC00355
	LINC02043
	ADGRE4P
	OPHN1
	ABHD2
	C11orf72
	L2HGDH
	LEPR
	TRAM2
	USP30-AS1
	LINC01160
	UOX
	TMEM69
	LRRC61
	LOC101927020
	LOC100131107
	BLACE
	LINC02104
	BFSP2-AS1
	MIR2117HG
	NPAP1L
	DGKG
	SP100
	HTATSF1P2
	MRGPRX3
	GABRR1
	TRERNA1
	MS4A4E
	FGF5
	SLC9A4
	BBS5
	GNRHR2
	TOR1AIP2
	TTC23
	TRAM2-AS1
	LOC643406
	TECRL
	BTD
	PRNCR1
	AAK1
	LINC02148

## Sheet: Fig 8-common genes
Names	total	elements
Cocaine-piRNA	targeted	genes	Common	piRNA	targeted	genes	HIV-Tat-piRNA	targeted	genes	TC-piRNA	targeted	genes	102	FRAS1
	LOC283856
	LOC101926889
	LINC00670
	C2orf91
	ENOX2
	PRORY
	ARHGEF26-AS1
	NPY6R
	LOC286437
	LILRB4
	SLC35D2
	LOC101927374
	LINC00381
	IGSF11
	CASC6
	MGC27345
	WARS2-AS1
	EPPIN
	TMEM212
	KCNQ1OT1
	UGDH-AS1
	DTNB
	PATE2
	TMEM241
	LINC01266
	KIR3DX1
	CHIAP2
	XKR9
	NKAIN3-IT1
	XAF1
	GPR141
	MCFD2
	ROR1-AS1
	ZNF124
	ACBD7
	LINC01194
	CD83
	SMC2-AS1
	LINC00507
	CCDC144A
	RDH16
	RASAL2-AS1
	C1QTNF9
	LINC01814
	GOSR1
	LOC100131257
	SOX9-AS1
	LOC101928131
	LINC01949
	GBP4
	LOC101928739
	LINC00504
	ABCC9
	PARP15
	EIF4E
	LINC00276
	LINC02141
	LINC00674
	NUDT9
	LOC102724532
	ZIM2-AS1
	SEM1
	POTEC
	TNPO1
	LOC646214
	TCAF2
	LINC00858
	CCDC144B
	SHISA9
	LINC00342
	SPC25
	ZNF616
	ADH4
	LINC01684
	LOC100129434
	CD70
	GLIPR1L2
	TSPAN6
	ENTPD1
	RABL3
	LSAMP-AS1
	LOC101926898
	POU6F2-AS2
	CFLAR
	LINC02071
	ZKSCAN3
	SBF2-AS1
	ORC4
	LINC02108
	TTPA
	NXPE3
	LINC02444
	KANTR
	CLEC12A-AS1
	LINC00506
	ZP2
	LINC01873
	LINC01489
	LINC00410
	KLRD1
	CYYR1-AS1
Cocaine-piRNA	targeted	genes	Common	piRNA	targeted	genes	HIV-Tat-piRNA	targeted	genes	502	LOC101929295
	HAUS2
	ZHX3
	HERPUD2
	MDFIC
	ATP5MF-PTCD1
	PRDM14
	BOLA3-AS1
	LINC01279
	RAB42
	GPSM2
	ITIH5
	SLC6A4
	SEC1P
	PNPT1
	C9orf85
	TOP3A
	SLC15A2
	RAB3IP
	NOSIP
	IRF1
	DOP1B
	GSTCD
	CASP6
	RPL36A
	IPO9
	LOC102723566
	RHOT1
	TRPM8
	TMEM19
	NOM1
	CLN8
	PCGF3
	LINC01772
	APOBR
	ZNF723
	EIF3J-DT
	PHF20
	MAP3K20
	HNF1A-AS1
	MTHFR
	MAN2A2
	ZFP14
	CCDC92B
	BISPR
	LOC100506476
	SSTR2
	DGKH
	CHRNA5
	TMEM267
	NEIL1
	FITM2
	NKD1
	RPL7L1
	TNFRSF9
	LOC101928489
	GTF2H2
	EXOSC2
	GIMAP1
	METTL2B
	CASP10
	MYO1C
	FRRS1L
	RBM23
	C9orf139
	TPM3
	F2RL1
	LOC100996351
	CCAR1
	APOC4
	USP49
	TFCP2L1
	YEATS2
	RASA4DP
	ACBD5
	TUBB
	CEACAM22P
	YME1L1
	COPA
	FBXL19-AS1
	ARFGEF3
	MRPS11
	PHC3
	ERLIN2
	SH3GLB1
	SLC12A6
	ZNF534
	LOC107984703
	LOC100506544
	FLJ42627
	ZNF665
	POLR2J4
	TLR6
	RBM26-AS1
	TMEM59
	PDE4C
	RUNDC3A-AS1
	FKBP14
	LINC00958
	MEAK7
	KCNE3
	LOC100134868
	PTGES3
	ZBED1
	LINC01857
	KIAA0355
	PTRH1
	IKZF3
	NDUFAF6
	RSKR
	EPHA1-AS1
	POU6F1
	LRRC69
	PLEKHG2
	MOB4
	VPS41
	FIRRE
	NPHS1
	TSN
	ZNF527
	AHCY
	ZNF432
	PBLD
	LOC100130111
	FAM126B
	LOC100131496
	TNK2-AS1
	LINC01725
	OPA3
	RPS6KA6
	TMEM25
	ERN2
	RASA4
	HTR3B
	AKIRIN1
	FHDC1
	UBE2L5
	SLC4A5
	RILPL1
	RAD1
	LYST
	GRM6
	ARL10
	MPV17L2
	LRRC2
	WWC1
	VSIG1
	SULT1A1
	MTMR12
	DSTYK
	GATAD1
	DBT
	LOC101927588
	NAIP
	KLHL28
	HELZ2
	XKR5
	MARVELD3
	ZNF264
	PQLC2
	PLIN3
	ZFP30
	MIR17HG
	JRK
	ICA1L
	XIAP
	PRKX
	NUDT14
	RAB11FIP4
	BMP7
	LINC01902
	B3GALT5-AS1
	FAM168B
	CPM
	GATD1
	GTF2H2B
	PAK3
	TRIM56
	IL21R
	TCFL5
	LOC100128573
	UACA
	SLC7A5P2
	NDUFAF7
	DHTKD1
	GK5
	IQCG
	ANKRD54
	CENPBD1
	ZNF818P
	CYB5D2
	CDK4
	ABCB5
	THG1L
	PTPN14
	GPRC5D-AS1
	RBM3
	GPR1
	IL6R-AS1
	SNHG7
	CENPN
	NMT2
	CENPC
	PFKM
	PBOV1
	PCF11-AS1
	SHANK2-AS1
	LINC00311
	AMACR
	VPS53
	IPO5P1
	ZNF530
	ASMTL-AS1
	MIGA1
	ARSA
	GGT6
	NUMBL
	GASAL1
	ZNF621
	RN7SL832P
	TPST2
	PRXL2A
	ACVR2B-AS1
	MAVS
	ZFP82
	LINC01235
	APOBEC3F
	MR1
	TRMT9B
	HSDL1
	RPL23AP64
	MIEF1
	LOC284395
	TSPAN14
	PRR11
	CEP104
	ZBTB8A
	ZBTB46-AS1
	CXorf38
	FKTN
	ALKBH4
	ERVV-1
	HSD17B7P2
	LINC00632
	FAM84B
	ZFR2
	PLUT
	NDUFC2
	NNT-AS1
	C3orf62
	KCTD20
	VDR
	GPR155
	M1AP
	LOC100507351
	PLCXD1
	FAM20B
	HES2
	GNL3L
	PRKAA2
	AP1S3
	ST3GAL2
	TMEM150C
	DFFA
	LINC00964
	ZNF174
	TSIX
	TRAF6
	ZYG11B
	HSPE1-MOB4
	PPARA
	DNM1P46
	PPP5D1
	CRX
	LINC02172
	CHM
	BTNL8
	SLC31A1
	TPM4
	FLJ37453
	CABP4
	CTNS
	DNASE2
	PXMP4
	LIAS
	LOC102723769
	BEND2
	ICAM4
	NOL12
	ZNF430
	PCGF5
	WIPF2
	ARL17B
	FOXRED2
	CYP20A1
	SPTY2D1
	MESTIT1
	AKT2
	RAB2B
	KREMEN1
	GALNT6
	TRIM13
	FFAR4
	TMED8
	ZC3H12D
	CACNG8
	SLC35E4
	GINS4
	TAF1
	GPR161
	TRIM66
	LNPK
	LL22NC03-63E9.3
	TYW5
	NAAA
	KCNA3
	PDP2
	SRP14-AS1
	ARMC9
	LINC01635
	PAXIP1-AS1
	CCNG1
	RAB29
	GLUL
	DEGS1
	AP3M1
	UBOX5
	ANAPC16
	PHACTR2
	KLF17
	ZNF346
	ZNF14
	C1QTNF3-AMACR
	CSAD
	ZNF865
	C21orf62
	KLB
	PPP1R3E
	TSNARE1
	LOC112543491
	GTF3C4
	TNFRSF1B
	PANO1
	TTF1
	CYP3A43
	PDE7A
	TM2D2
	NCAPD2
	LINC01299
	SCIMP
	ZNF483
	TRIOBP
	KCNJ3
	GIN1
	FER
	SLC43A2
	SFTPB
	KIF1C
	TBX19
	HIPK1-AS1
	CXorf21
	CEP19
	HSH2D
	GGCX
	SMIM14
	BTN2A3P
	SLC26A2
	SIGLEC10
	ZNF160
	MINDY2
	CNIH4
	GPX8
	LINC02210
	LRRC8B
	RAB11FIP1
	CSNK1G1
	SNX22
	LOC100128494
	ZCCHC8
	LOC339803
	POLH
	TMEM87A
	KIAA1614
	DNM1P35
	SEC14L6
	DDX51
	IYD
	HAND2-AS1
	CYB5RL
	NR2C1
	ZNF470
	AKAP5
	IL4R
	PRMT9
	TAF8
	CCL5
	RBM41
	CLSPN
	PTAFR
	REL
	SMIM5
	CCDC157
	TM7SF3
	TMEM213
	ORAI2
	NT5C2
	NBR2
	FAM71F2
	KIF3A
	MCUR1
	C6orf132
	KLK10
	CRK
	DENND4C
	PHKG1
	PATJ
	SLC35E3
	GJC1
	LINC02099
	FAM210B
	HILPDA
	TBC1D27P
	ADAT1
	ZNF737
	PTCD1
	PRR7-AS1
	TMEM126B
	FZD3
	LDLRAD1
	TIMM50
	APOC4-APOC2
	CUTALP
	ATG12
	ZNF620
	ZIM3
	ORC6
	SS18L1
	CARF
	LOC100130950
	LOC440300
	C8orf49
	RAMP2-AS1
	ZNF714
	NIPAL1
	ANKRD44-IT1
	IL11
	LOC103344931
	FBXL18
	LOC101928994
	IDE
	ZNF433-AS1
	PLA2G12A
	LOC100287846
	RSL1D1
	SBNO1
	POLR2E
	LYRM7
	ATCAY
	BCYRN1
	AGMAT
	PRKXP1
	PABPC1P2
	LINC01970
	SLC35E2A
	MCPH1
	TNFSF14
	ZNF557
	MRPL30
	LOC100268168
	ALG1
	C18orf61
	C9orf147
	NUP62
	SCAF11
	WNT7B
	SERPINB12
	SLC38A7
	PCED1B-AS1
	FGD6
	RASSF6
	SMG9
	LINC00167
	CEBPZOS
	C21orf58
	IL1R1
	ATP8B1
	PGPEP1
	LINC01521
	RBL1
	VHL
	MAP3K9
	LOC105373044
	LINC02078
	C15orf40
	C1orf43
	MDM4
	SYAP1
	NLRC3
	PMS2
	PSMA3-AS1
	ACTR3C
	PLA2G4E-AS1
Cocaine-piRNA	targeted	genes	Common	piRNA	targeted	genes	TC-piRNA	targeted	genes	32	LPP
	LINC00355
	LOC100419170
	LINC02043
	ADGRE4P
	OPHN1
	L2HGDH
	LLPH-DT
	LINC01160
	TCTN1
	LOC101927020
	USP45
	LINC02104
	BFSP2-AS1
	MIR2117HG
	TPTE2P1
	SP100
	HTATSF1P2
	LOC728752
	MRGPRX3
	SSR2
	GABRR1
	BBS5
	GNRHR2
	GSG1
	MIR4713HG
	SMG1P7
	LOC643406
	TECRL
	PRNCR1
	AAK1
	LINC02148
HIV-Tat-piRNA	targeted	genes	TC-piRNA	targeted	genes	11	ZNF66
	ABL2
	LOC101927575
	C1QTNF7
	PGM5P2
	LOC101928118
	LOC101928936
	LOC101929415
	ANKRD62P1-PARP4
	CA5B
	CCDC9
Cocaine-piRNA	targeted	genes	Common	piRNA	targeted	genes	8	LOC102724434
	A4GALT
	AGO4
	PTPRC
	ZNF365
	LOC400800
	LINC01541
	MDH1B
HIV-Tat-piRNA	targeted	genes	525	EML2-AS1
	LINC01284
	PIGX
	TMEM130
	ZNF554
	SLC4A1
	SOX7
	GLTP
	FGL2
	CUBN
	C9orf78
	TRAF3IP2
	POLK
	MEF2C-AS1
	SLC6A11
	CYCS
	CNGB1
	SIRPB2
	C2orf49
	TRIM74
	SLC25A37
	NWD1
	CLHC1
	PHLDA3
	RNF14
	FGFR1
	ZNF248
	INIP
	ZNF208
	FAM20A
	SPN
	COX14
	RRP7A
	MYO3B
	KDELC2
	PTCD3
	CEP135
	TMEM184A
	TCEANC2
	TIGD6
	MRI1
	AKR1B10
	LINC01360
	HOOK3
	LINC01744
	HNMT
	RNF141
	DNAJC22
	NOS1
	LOC101929259
	LINC02249
	FAAHP1
	ZNF197
	PWARSN
	TRIM60
	ZNF660-ZNF197
	YARS2
	LINC01429
	LINC00482
	CES2
	LINC01934
	SPIRE2
	ZNF43
	BORCS7
	RAD23B
	SIAH3
	FBLIM1
	ZNF749
	HRH4
	TNFRSF14-AS1
	LOC283299
	ZNF154
	ATP2C2-AS1
	KLHL36
	SEMA3E
	LINC01653
	BCLAF3
	C8orf44-SGK3
	LRRC58
	CEBPB-AS1
	MAP3K13
	LOC647070
	KIF11
	PART1
	ADI1
	SLC2A3
	ACOX1
	QPRT
	TMEM233
	FAXC
	AICDA
	FKRP
	PAG1
	CXorf56
	PCAT5
	GCK
	LARS
	RCSD1
	FGD4
	GSN-AS1
	CHST6
	ATG10
	BACE2
	LINC00649
	ZNF549
	LINC01356
	PRRG4
	IL6R
	GRIN2C
	BAG1
	MIR1-1HG-AS1
	MMAB
	OSER1-DT
	RNF144A
	NEAT1
	LOC101926915
	ZNF320
	HMGB3P1
	MPV17L
	C11orf58
	EPGN
	TMED9
	ENAH
	EHD4-AS1
	PRR5
	CROT
	ZNF366
	KIAA0586
	IL27RA
	LOC101927666
	ZNF566
	ZNF425
	RSU1
	RBPMS
	MAGT1
	TAMM41
	GPR132
	PIK3C2A
	MAP2K6
	MED18
	ECE1
	SHANK2-AS3
	LOC339059
	BCL2L15
	MANSC4
	LOC102724719
	C17orf75
	ZNF738
	PEAK1
	LOC101929698
	LOC729652
	TPT1
	VWA2
	BASP1-AS1
	VSTM4
	ZNF107
	TTC24
	NCRUPAR
	CHRNB1
	IFT22
	TLL2
	C12orf65
	LOC102724927
	QPCTL
	VTI1A
	LMCD1-AS1
	LINC01754
	WDR91
	CWF19L1
	PAWR
	AKR7A2
	LDLR
	ASTN2
	FAM177A1
	FAM9B
	LINC01530
	UQCRB
	BEST1
	TMIGD2
	PEX13
	SGTB
	COX20
	CRCP
	ARHGEF39
	DCAF11
	GTF2H5
	PANK1
	PLEKHM3
	DMBT1P1
	ZNF578
	OLMALINC
	TCTA
	LOC284577
	PCYOX1
	LOC100288748
	EMX2OS
	ATXN3
	LOC100506548
	ILF3-DT
	INPP5B
	MIR1285-2
	LOC100507516
	ZNF546
	ZNF101
	EAF1
	LINC01887
	LOC100506472
	ZNF136
	IL15
	ZNF565
	PRF1
	SRGAP2C
	OSTM1
	LCTL
	BMS1
	ALDH7A1
	ZNF514
	CDHR3
	ZKSCAN1
	FAM153C
	METTL16
	ZKSCAN4
	ACP7
	GABPB1-IT1
	DKC1
	LOC101929340
	LINC01122
	ARMC10
	TGFB1
	DCUN1D2
	ZNF780B
	KANK4
	OCIAD1
	ZNF713
	C8orf34
	PIH1D3
	UBE2B
	LINC01993
	KIAA1841
	ASAP1-IT2
	MAPK8IP2
	RSPH3
	PYROXD1
	ACTG1P17
	DCAF16
	SOAT1
	ZNRF3-AS1
	DIS3
	LINC00672
	COA1
	KIF1B
	LINC01978
	ZNF829
	LINC01111
	ZNF696
	SNTB2
	WDR82
	PKP2
	FILIP1
	SAMD5
	NFAM1
	RBMY1D
	SMIM11B
	PTAR1
	SLC44A3-AS1
	MTMR9
	CPT2
	IVD
	SPRED3
	CD68
	CATSPER2P1
	ELOC
	PPAN
	LINC01588
	LOC101928283
	GALNT15
	LOC101929165
	SNAP29
	PHAX
	WDR31
	C9orf64
	TALAM1
	TRPM7
	CNNM1
	FCF1P2
	NIP7
	MCPH1-AS1
	ANKRD16
	PECAM1
	PPP1R12B
	ZNF555
	MKRN2OS
	DSC3
	CCR6
	BPNT1
	SHE
	PIAS2
	IL2RA
	LINC01842
	C5orf63
	USP15
	VKORC1L1
	STX17
	GDNF
	SFXN1
	PCLAF
	YAF2
	SH3BP2
	LRRK1
	SLC30A8
	ANKH
	APOPT1
	LILRB3
	TRIM73
	TMEM236
	LOC101927583
	NLN
	ICMT
	ZNF815P
	OR1F12
	C12orf43
	SLC25A4
	SEC24C
	METTL6
	SRSF10
	RINL
	RAB3B
	ERBB3
	NUP58
	AP5B1
	RIOK2
	SRGAP2B
	CALU
	MOK
	LINC02547
	COX18
	ENTPD4
	APOOL
	TRABD2A
	FLJ42102
	TMEM181
	LINC01105
	ANKRD62
	GTF2IP23
	LINC02042
	SLC35E1
	NUDC
	AP4S1
	ZNF426
	GBP6
	KIAA1549
	LINC01268
	CCL28
	FAM239B
	SRD5A3
	LOC100506444
	XPNPEP3
	MTDH
	UNC13A
	LOC100144595
	DCP2
	OTUD6A
	SRD5A3-AS1
	SLC7A11-AS1
	C2
	NOP14
	TUBGCP4
	LOC100128310
	LINC00243
	SMIM11A
	CYP2W1
	LOC101928231
	TSEN34
	PRKY
	LOC100506679
	TRIM52-AS1
	CAMK4
	DENND6A-DT
	ZNF34
	HHLA3
	CHST12
	LOC644215
	JPT2
	LINC00909
	SLC24A1
	FAM76A
	COL16A1
	PCDHB9
	STAU2-AS1
	NFATC2IP
	LOC101928052
	DSG3
	NFKBIB
	TIMELESS
	NUP107
	MYOZ3
	WAC-AS1
	LINC01392
	RC3H2
	TBC1D22A
	LINC01550
	CMBL
	NRIP2
	SUGP2
	LOC654780
	MS4A7
	GNB5
	ZNF106
	LOC100507412
	ICA1
	OXNAD1
	CDH23
	EXOG
	LOC100128288
	MED15P9
	C16orf87
	GXYLT1
	CSNK1G2-AS1
	PAICS
	RBBP5
	FTCDNL1
	LAMP2
	LINC00927
	DRAIC
	HBS1L
	LOC101928844
	ZNF431
	FAM227A
	LINC02139
	MRPS21
	GCAT
	NCMAP
	MFSD4B
	MESD
	UBIAD1
	LINC00518
	ADCY2
	RABGAP1L
	SNRPD3
	LOC100128593
	CHURC1
	FAM21EP
	LINC01551
	OIP5-AS1
	BLZF1
	SPACA6P-AS
	LINC02245
	FDPSP2
	UBR2
	ZNF789
	ECT2L
	LOC101927692
	SEMA5A
	LRRC28
	TTPAL
	LINC00578
	OR11A1
	TMEM132B
	LINC02177
	LINC00562
	BUD23
	TCF7
	ZNF570
	TMEM192
	CLUAP1
	CBX5
	DNAL1
	LINC01426
	LRRC57
	LOC101929767
	ZNF37A
	HTR2A
	STX16
	KCNJ5
	CDKN2AIPNL
	LRP2BP
	ZNF250
	ZNF860
	LINC00907
	ZNFX1
	NCOA7
	CCP110
	LOC101928551
	PEX5L
	LOC100507006
	COMMD9
	HIP1
	LOC101929057
	OLA1
	MMP19
	LRCH3
	SGK3
	CRAMP1
	RRS1-AS1
	RFLNB
	CES1P1
	POM121
	ZNF845
	KDSR
	PLXDC1
	HNRNPU
	TMEM168
	DLEU1
	DNAAF4
	ZNF33A
	IQCC
	LINC00581
	MRPS18B
	LRPAP1
	MAFF
	TMC7
	TNFRSF10D
	AGPAT4-IT1
	SF3B3
	LOC100131626
	SLC17A5
	LRIG2
	C11orf54
	NDUFA5
	LOC107985820
	SPC24
	RPS6KA3
	SRSF12
	PDE12
	RNASEH1
TC-piRNA	targeted	genes	42	LINC02073
	BRIX1
	NXNL2
	CD8B2
	CHMP1B2P
	ABHD2
	C11orf72
	TEX13D
	LEPR
	TRAM2
	USP30-AS1
	LINC02261
	UOX
	TMEM69
	LRRC61
	LOC389834
	LOC100131107
	ZNF480
	PITPNM2
	ARRDC3-AS1
	BLACE
	NPAP1L
	DGKG
	TRIM4
	LINC00365
	SETDB2
	TRERNA1
	PTCHD4
	MS4A4E
	FGF5
	SLC9A4
	MYHAS
	TOR1AIP2
	ZNF37BP
	TTC23
	LOC105370802
	TRAM2-AS1
	BTD
	LOC105370361
	LOC101928103
	SEPSECS-AS1
	BHLHE40-AS1

## Sheet: gene targets for GEO and KEGG
ABCC9									Gene stable ID	NCBI gene (formerly Entrezgene) ID	Gene name			ncbi-geneid	127	hsa:127	ADH4; alcohol dehydrogenase 4 (class II), pi polypeptide
ACBD7									ENSG00000198099	127	ADH4			ncbi-geneid	953	hsa:953	ENTPD1; ectonucleoside triphosphate diphosphohydrolase 1
ADH4									ENSG00000138185	953	ENTPD1			ncbi-geneid	970	hsa:970	CD70; CD70 molecule
ARHGEF26									ENSG00000125726	970	CD70			ncbi-geneid	1838	hsa:1838	DTNB; dystrobrevin beta
C1QTNF9									ENSG00000138101	1838	DTNB			ncbi-geneid	1977	hsa:1977	EIF4E; eukaryotic translation initiation factor 4E
C2orf91									ENSG00000151247	1977	EIF4E			ncbi-geneid	3824	hsa:3824	KLRD1; killer cell lectin like receptor D1
CASC6									ENSG00000134539	3824	KLRD1			ncbi-geneid	3842	hsa:3842	TNPO1; transportin 1
CCDC144A									ENSG00000083312	3842	TNPO1			ncbi-geneid	4045	hsa:4045	LSAMP; limbic system associated membrane protein
CCDC144B									ENSG00000185565	4045	LSAMP			ncbi-geneid	4919	hsa:4919	ROR1; receptor tyrosine kinase like orphan receptor 1
CD70									ENSG00000226306	4888	NPY6R			ncbi-geneid	5000	hsa:5000	ORC4; origin recognition complex subunit 4
CD83									ENSG00000185483	4919	ROR1			ncbi-geneid	6662	hsa:6662	SOX9; SRY-box transcription factor 9
CFLAR									ENSG00000115947	5000	ORC4			ncbi-geneid	7105	hsa:7105	TSPAN6; tetraspanin 6
CHIAP2									ENSG00000125398	6662	SOX9			ncbi-geneid	7274	hsa:7274	TTPA; alpha tocopherol transfer protein
CLEC12A									ENSG00000000003	7105	TSPAN6			ncbi-geneid	7358	hsa:7358	UGDH; UDP-glucose 6-dehydrogenase
CYYR1-AS1									ENSG00000137561	7274	TTPA			ncbi-geneid	7678	hsa:7678	ZNF124; zinc finger protein 124
DTNB									ENSG00000109814	7358	UGDH			ncbi-geneid	7783	hsa:7783	ZP2; zona pellucida glycoprotein 2
EIF4E									ENSG00000196418	7678	ZNF124			ncbi-geneid	7979	hsa:7979	SEM1; SEM1 26S proteasome subunit
ENOX2									ENSG00000284588	7783	ZP2			ncbi-geneid	8608	hsa:8608	RDH16; retinol dehydrogenase 16
ENTPD1									ENSG00000127922	7979	SEM1			ncbi-geneid	8837	hsa:8837	CFLAR; CASP8 and FADD like apoptosis regulator
EPPIN									ENSG00000139547	8608	RDH16			ncbi-geneid	9308	hsa:9308	CD83; CD83 molecule
FRAS1									ENSG00000003402	8837	CFLAR
GBP4									ENSG00000112149	9308	CD83
GLIPR1L2									ENSG00000075391	9462	RASAL2
GOSR1									ENSG00000108587	9527	GOSR1
GPR141									ENSG00000170160	9720	CCDC144A
IGSF11									ENSG00000069431	10060	ABCC9
KANTR									ENSG00000116874	10352	WARS2
KCNQ1OT1									ENSG00000165675	10495	ENOX2
KIR3DX1									ENSG00000136824	10592	SMC2
KLRD1									ENSG00000269821	10984	KCNQ1OT1
LILRB4									ENSG00000278555	11006	LILRB4
LSAMP									ENSG00000130958	11046	SLC35D2
MCFD2									ENSG00000106536	11281	POU6F2
MGC27345									ENSG00000269699	23619	ZIM2
NKAIN3									ENSG00000277101	26084	ARHGEF26
NPY6R									ENSG00000170502	53343	NUDT9
NUDT9									ENSG00000132530	54739	XAF1
NXPE3									ENSG00000101448	57119	EPPIN
ORC4									ENSG00000277909	57405	SPC25
PARP15									ENSG00000138759	80144	FRAS1
PATE2									ENSG00000189298	80317	ZKSCAN3
POTEC									ENSG00000133812	81846	SBF2
POU6F2									ENSG00000134490	85019	TMEM241
PRORY									ENSG00000204611	90317	ZNF616
RABL3									ENSG00000180398	90411	MCFD2
RASAL2									ENSG00000144815	91775	NXPE3
RDH16									ENSG00000162654	115361	GBP4
ROR1									ENSG00000180481	144321	GLIPR1L2
SBF2									ENSG00000203878	149620	CHIAP2
SEM1									ENSG00000144847	152404	IGSF11
SHISA9									ENSG00000172322	160364	CLEC12A
SLC35D2									ENSG00000173200	165631	PARP15
SMC2									ENSG00000154874	284047	CCDC144B
SOX9									ENSG00000144840	285282	RABL3
SPC25									ENSG00000170379	285966	TCAF2
TCAF2									ENSG00000185942	286183	NKAIN3
TMEM212									ENSG00000240654	338872	C1QTNF9
TMEM241									ENSG00000187037	353345	GPR141
TNPO1									ENSG00000183206	388468	POTEC
TSPAN6									ENSG00000186329	389177	TMEM212
TTPA									ENSG00000221947	389668	XKR9
UGDH									ENSG00000196844	399967	PATE2
WARS2									ENSG00000176244	414149	ACBD7
XAF1									ENSG00000237515	729993	SHISA9
XKR9									ENSG00000197934	100996571	CYYR1-AS1
ZIM2									ENSG00000276033		KIR3DX1
ZKSCAN3									ENSG00000183146		PRORY
ZNF124									ENSG00000232593		KANTR
ZNF616									ENSG00000224944		CASC6
ZP2
LINC00276
LINC00342
LINC00381
LINC00410
LINC00504
LINC00506
LINC00507
LINC00670
LINC00674
LINC00858
LINC01194
LINC01266
LINC01489
LINC01684
LINC01814
LINC01873
LINC01949
LINC02071
LINC02108
LINC02141
LINC02444
LOC100129434
LOC100131257
LOC101926889
LOC101926898
LOC101927374
LOC101928131
LOC101928739
LOC102724532
LOC283856
LOC286437
LOC646214

## Sheet: GO profiler GO analysis
ID	Description	GeneRatio	BgRatio	pvalue	p.adjust	qvalue	geneID	Count
GO:0006635	GO:0006635	fatty acid beta-oxidation	1934-08-01	72/18493	5.92099e-13	6.38874e-10	4.52488e-10	ACADVL/ACACB/ACADS/ACADL/ACAT1/ACAA1/ACADM/ACAT2	8
GO:0072329	GO:0072329	monocarboxylic acid catabolic process	1934-09-01	129/18493	1.33437e-12	7.1989e-10	5.09868e-10	ACADVL/ACACB/ABAT/ACADS/ACADL/ACAT1/ACAA1/ACADM/ACAT2	9
GO:0019395	GO:0019395	fatty acid oxidation	1934-08-01	98/18493	7.53504e-12	2.39753e-09	1.69807e-09	ACADVL/ACACB/ACADS/ACADL/ACAT1/ACAA1/ACADM/ACAT2	8
GO:0034440	GO:0034440	lipid oxidation	1934-08-01	100/18493	8.88795e-12	2.39753e-09	1.69807e-09	ACADVL/ACACB/ACADS/ACADL/ACAT1/ACAA1/ACADM/ACAT2	8
GO:0009062	GO:0009062	fatty acid catabolic process	1934-08-01	106/18493	1.4296e-11	3.08508e-09	2.18504e-09	ACADVL/ACACB/ACADS/ACADL/ACAT1/ACAA1/ACADM/ACAT2	8
GO:0016054	GO:0016054	organic acid catabolic process	1934-10-01	265/18493	2.98556e-11	4.60202e-09	3.25942e-09	ACADVL/ACACB/ABAT/ACADS/ACADL/ACADSB/ACAT1/ACAA1/ACADM/ACAT2	10
GO:0046395	GO:0046395	carboxylic acid catabolic process	1934-10-01	265/18493	2.98556e-11	4.60202e-09	3.25942e-09	ACADVL/ACACB/ABAT/ACADS/ACADL/ACADSB/ACAT1/ACAA1/ACADM/ACAT2	10
GO:0044242	GO:0044242	cellular lipid catabolic process	1934-09-01	207/18493	9.54039e-11	1.28676e-08	9.11358e-09	ACADVL/ACACB/AADAC/ACADS/ACADL/ACAT1/ACAA1/ACADM/ACAT2	9
GO:0006631	GO:0006631	fatty acid metabolic process	1934-10-01	369/18493	7.5867e-10	9.09561e-08	6.44204e-08	ACADVL/ACACB/ACADS/ACADL/ACADSB/ACACA/ACAT1/ACAA1/ACADM/ACAT2	10
GO:0030258	GO:0030258	lipid modification	1934-09-01	291/18493	1.94255e-09	2.09601e-07	1.48451e-07	ACADVL/ACACB/ABO/ACADS/ACADL/ACAT1/ACAA1/ACADM/ACAT2	9
GO:0033539	GO:0033539	fatty acid beta-oxidation using acyl-CoA dehydrogenase	1934-04-01	11/18493	3.11302e-09	3.04682e-07	2.15793e-07	ACADVL/ACADS/ACADL/ACADM	4
GO:0044282	GO:0044282	small molecule catabolic process	1934-10-01	431/18493	3.38849e-09	3.04682e-07	2.15793e-07	ACADVL/ACACB/ABAT/ACADS/ACADL/ACADSB/ACAT1/ACAA1/ACADM/ACAT2	10
GO:0016042	GO:0016042	lipid catabolic process	1934-09-01	321/18493	4.58093e-09	3.80217e-07	2.69292e-07	ACADVL/ACACB/AADAC/ACADS/ACADL/ACAT1/ACAA1/ACADM/ACAT2	9
GO:0008203	GO:0008203	cholesterol metabolic process	1934-06-01	144/18493	2.25625e-07	1.73892e-05	1.23161e-05	ACADVL/ACACB/ACADL/ACACA/ABCA1/ACAT2	6
GO:1902652	GO:1902652	secondary alcohol metabolic process	1934-06-01	149/18493	2.76095e-07	1.98604e-05	1.40663e-05	ACADVL/ACACB/ACADL/ACACA/ABCA1/ACAT2	6
GO:0019216	GO:0019216	regulation of lipid metabolic process	1934-08-01	388/18493	3.93542e-07	2.65395e-05	1.87968e-05	ACADVL/ACACB/SERPINA3/AADAC/ACADL/ACACA/ACADM/ABCA1	8
GO:0016125	GO:0016125	sterol metabolic process	1934-06-01	162/18493	4.52135e-07	2.86973e-05	2.03251e-05	ACADVL/ACACB/ACADL/ACACA/ABCA1/ACAT2	6
GO:0032365	GO:0032365	intracellular lipid transport	1934-04-01	35/18493	4.78774e-07	2.86998e-05	2.03269e-05	ACACB/ACACA/ABCA1/ABCA2	4
GO:0009410	GO:0009410	response to xenobiotic stimulus	1934-07-01	282/18493	6.73044e-07	3.82218e-05	2.70709e-05	ABAT/AADAC/NAT2/ACAA1/AOC1/ASIC1/NAT1	7
GO:0008202	GO:0008202	steroid metabolic process	1934-07-01	318/18493	1.50263e-06	8.10671e-05	5.74164e-05	ACADVL/ACACB/ACADL/ACACA/ACAA1/ABCA1/ACAT2	7
GO:0048871	GO:0048871	multicellular organismal homeostasis	1934-08-01	471/18493	1.69192e-06	8.69327e-05	6.15708e-05	ACHE/ACADVL/ACACB/ABAT/SERPINA3/ACADL/ACACA/ABCA4	8
GO:0006805	GO:0006805	xenobiotic metabolic process	1934-05-01	117/18493	2.23519e-06	0.000109626	7.76435e-05	AADAC/NAT2/ACAA1/AOC1/NAT1	5
GO:0090181	GO:0090181	regulation of cholesterol metabolic process	1934-04-01	63/18493	5.25224e-06	0.000246399	0.000174514	ACADVL/ACACB/ACADL/ACACA	4
GO:0071466	GO:0071466	cellular response to xenobiotic stimulus	1934-05-01	171/18493	1.4277e-05	0.000641872	0.000454611	AADAC/NAT2/ACAA1/AOC1/NAT1	5
GO:0045922	GO:0045922	negative regulation of fatty acid metabolic process	1934-03-01	28/18493	1.80252e-05	0.000777969	0.000551003	ACADVL/ACACB/ACADL	3
GO:0046320	GO:0046320	regulation of fatty acid oxidation	1934-03-01	29/18493	2.00798e-05	0.000833312	0.0005902	ACADVL/ACACB/ACADL	3
GO:0006066	GO:0006066	alcohol metabolic process	1934-06-01	348/18493	3.66503e-05	0.00146465	0.00103735	ACADVL/ACACB/ACADL/ACACA/ABCA1/ACAT2	6
GO:0006084	GO:0006084	acetyl-CoA metabolic process	1934-03-01	37/18493	4.22713e-05	0.00162228	0.00114899	ACACB/ACACA/ACAT1	3
GO:0006869	GO:0006869	lipid transport	1934-06-01	359/18493	4.36016e-05	0.00162228	0.00114899	ACACB/ACACA/ABCA4/ABCA3/ABCA1/ABCA2	6
GO:0097305	GO:0097305	response to alcohol	1934-05-01	231/18493	6.02953e-05	0.00216862	0.00153594	ABAT/ACACA/ABCA1/AANAT/ABCA2	5
GO:0019218	GO:0019218	regulation of steroid metabolic process	1934-04-01	119/18493	6.51091e-05	0.00226622	0.00160507	ACADVL/ACACB/ACADL/ACACA	4
GO:0010876	GO:0010876	lipid localization	1934-06-01	393/18493	7.20383e-05	0.00242904	0.00172039	ACACB/ACACA/ABCA4/ABCA3/ABCA1/ABCA2	6
GO:0050885	GO:0050885	neuromuscular process controlling balance	1934-03-01	50/18493	0.000104903	0.00343002	0.00242934	ABL1/AARS/ABR	3
GO:0035384	GO:0035384	thioester biosynthetic process	1934-03-01	51/18493	0.00011132	0.00343183	0.00243062	ACACB/ACACA/ACAT1	3
GO:0071616	GO:0071616	acyl-CoA biosynthetic process	1934-03-01	51/18493	0.00011132	0.00343183	0.00243062	ACACB/ACACA/ACAT1	3
GO:0051262	GO:0051262	protein tetramerization	1934-04-01	153/18493	0.000172195	0.00516105	0.00365536	ACHE/ACACB/ACADL/ACACA	4
GO:0072330	GO:0072330	monocarboxylic acid biosynthetic process	1934-05-01	293/18493	0.000184206	0.00526784	0.00373099	ACADVL/ACACB/ABAT/ACADL/ACACA	5
GO:0006633	GO:0006633	fatty acid biosynthetic process	1934-04-01	156/18493	0.000185522	0.00526784	0.00373099	ACADVL/ACACB/ACADL/ACACA	4
GO:0033866	GO:0033866	nucleoside bisphosphate biosynthetic process	1934-03-01	67/18493	0.000250984	0.00619659	0.00438879	ACACB/ACACA/ACAT1	3
GO:0034030	GO:0034030	ribonucleoside bisphosphate biosynthetic process	1934-03-01	67/18493	0.000250984	0.00619659	0.00438879	ACACB/ACACA/ACAT1	3
GO:0034033	GO:0034033	purine nucleoside bisphosphate biosynthetic process	1934-03-01	67/18493	0.000250984	0.00619659	0.00438879	ACACB/ACACA/ACAT1	3
GO:0009437	GO:0009437	carnitine metabolic process	1934-02-01	13/18493	0.000252688	0.00619659	0.00438879	ACADL/ACADM	2
GO:0032488	GO:0032488	Cdc42 protein signal transduction	1934-02-01	13/18493	0.000252688	0.00619659	0.00438879	ABL1/ABCA1	2
GO:1902001	GO:1902001	fatty acid transmembrane transport	1934-02-01	13/18493	0.000252688	0.00619659	0.00438879	ACACB/ACACA	2
GO:0001659	GO:0001659	temperature homeostasis	1934-04-01	171/18493	0.000263585	0.00632018	0.00447632	ACHE/ACADVL/ABAT/ACADL	4
GO:0051260	GO:0051260	protein homooligomerization	1934-05-01	328/18493	0.000310463	0.00728238	0.0051578	ACACB/ACADL/ACACA/ACAT1/ASIC1	5
GO:0042447	GO:0042447	hormone catabolic process	1934-02-01	15/18493	0.000339373	0.00766968	0.00543211	ACHE/ACAA1	2
GO:0046890	GO:0046890	regulation of lipid biosynthetic process	1934-04-01	183/18493	0.000341191	0.00766968	0.00543211	ACADVL/ACACB/ACADL/ACACA	4
GO:0006695	GO:0006695	cholesterol biosynthetic process	1934-03-01	75/18493	0.000350244	0.00771251	0.00546244	ACACB/ACACA/ACAT2	3
GO:1902653	GO:1902653	secondary alcohol biosynthetic process	1934-03-01	76/18493	0.00036418	0.007859	0.0055662	ACACB/ACACA/ACAT2	3
GO:0051289	GO:0051289	protein homotetramerization	1934-03-01	78/18493	0.000393114	0.00831707	0.00589063	ACACB/ACADL/ACACA	3
GO:0006577	GO:0006577	amino-acid betaine metabolic process	1934-02-01	17/18493	0.000438557	0.00894198	0.00633323	ACADL/ACADM	2
GO:0016126	GO:0016126	sterol biosynthetic process	1934-03-01	81/18493	0.000439226	0.00894198	0.00633323	ACACB/ACACA/ACAT2	3
GO:0097164	GO:0097164	ammonium ion metabolic process	1934-04-01	199/18493	0.000468552	0.00936235	0.00663096	ACHE/ABAT/ACADL/ACADM	4
GO:0045833	GO:0045833	negative regulation of lipid metabolic process	1934-03-01	85/18493	0.000505922	0.00992527	0.00702966	ACADVL/ACACB/ACADL	3

## Sheet: Biological processes
Column1	Column2	Column3
Analysis Type	PANTHER Overrepresentation Test (Released 20210224)
Annotation Version and Release Date	GO Ontology database DOI	10.5281/zenodo.4495804 Released 2021-02-01
Analyzed List	upload_1 (Homo sapiens)
Reference List	Homo sapiens (all genes in database)
Test Type	FISHER
Correction	FDR
GO biological process complete Homo sapiens - REFLIST (20595) upload_1 (67) upload_1 (expected) upload_1 (over/under) upload_1 (fold Enrichment) upload_1 (raw P-value) upload_1 (FDR)
germ-line sex determination (GO	0018992) 1 1 .00 + > 100 6.47E-03 1.00E00
ADP catabolic process (GO	0046032) 1 1 .00 + > 100 6.47E-03 1.00E00
negative regulation of cytotoxic T cell differentiation (GO	0045584) 1 1 .00 + > 100 6.47E-03 1.00E00
male germ-line sex determination (GO	0019100) 1 1 .00 + > 100 6.47E-03 1.00E00
negative regulation of IP-10 production (GO	0071659) 1 1 .00 + > 100 6.47E-03 1.00E00
mitochondrial tryptophanyl-tRNA aminoacylation (GO	0070183) 1 1 .00 + > 100 6.47E-03 1.00E00
regulation of vesicle targeting, to, from or within Golgi (GO	0048209) 1 1 .00 + > 100 6.47E-03 1.00E00
regulation of cell proliferation involved in tissue homeostasis (GO	0060784) 1 1 .00 + > 100 6.47E-03 1.00E00
epithelial cell proliferation involved in prostate gland development (GO	0060767) 1 1 .00 + > 100 6.47E-03 1.00E00
primary sex determination, germ-line (GO	0007542) 1 1 .00 + > 100 6.47E-03 1.00E00
epithelial cell proliferation involved in prostatic bud elongation (GO	0060517) 1 1 .00 + > 100 6.47E-03 1.00E00
prevention of polyspermy (GO	0060468) 2 1 .01 + > 100 9.70E-03 1.00E00
negative regulation of fertilization (GO	0060467) 2 1 .01 + > 100 9.70E-03 1.00E00
ganglion mother cell fate determination (GO	0007402) 2 1 .01 + > 100 9.70E-03 1.00E00
regulation of IP-10 production (GO	0071658) 2 1 .01 + > 100 9.70E-03 1.00E00
tryptophanyl-tRNA aminoacylation (GO	0006436) 2 1 .01 + > 100 9.70E-03 1.00E00
neural crest cell fate specification (GO	0014036) 2 1 .01 + > 100 9.70E-03 1.00E00
negative regulation of myoblast fusion (GO	1901740) 2 1 .01 + > 100 9.70E-03 1.00E00
interleukin-10-mediated signaling pathway (GO	0140105) 2 1 .01 + > 100 9.70E-03 1.00E00
negative regulation of beta-catenin-TCF complex assembly (GO	1904864) 2 1 .01 + > 100 9.70E-03 1.00E00
regulation of beta-catenin-TCF complex assembly (GO	1904863) 2 1 .01 + > 100 9.70E-03 1.00E00
intrahepatic bile duct development (GO	0035622) 2 1 .01 + > 100 9.70E-03 1.00E00
positive regulation of mini excitatory postsynaptic potential (GO	0061885) 2 1 .01 + > 100 9.70E-03 1.00E00
regulation of mini excitatory postsynaptic potential (GO	0061884) 2 1 .01 + > 100 9.70E-03 1.00E00
negative regulation of hepatocyte apoptotic process (GO	1903944) 2 1 .01 + > 100 9.70E-03 1.00E00
regulation of hepatocyte apoptotic process (GO	1903943) 2 1 .01 + > 100 9.70E-03 1.00E00
negative regulation of monocyte activation (GO	0150102) 2 1 .01 + > 100 9.70E-03 1.00E00
IDP catabolic process (GO	0046709) 2 1 .01 + > 100 9.70E-03 1.00E00
IDP metabolic process (GO	0046707) 2 1 .01 + > 100 9.70E-03 1.00E00
lung smooth muscle development (GO	0061145) 2 1 .01 + > 100 9.70E-03 1.00E00
ultradian rhythm (GO	0007624) 2 1 .01 + > 100 9.70E-03 1.00E00
primary sex determination (GO	0007538) 2 1 .01 + > 100 9.70E-03 1.00E00
bronchus cartilage development (GO	0060532) 2 1 .01 + > 100 9.70E-03 1.00E00
primary prostatic bud elongation (GO	0060516) 2 1 .01 + > 100 9.70E-03 1.00E00
regulation of cytotoxic T cell differentiation (GO	0045583) 3 1 .01 + > 100 1.29E-02 1.00E00
ureter smooth muscle cell differentiation (GO	0072193) 3 1 .01 + > 100 1.29E-02 1.00E00
ureter smooth muscle development (GO	0072191) 3 1 .01 + > 100 1.29E-02 1.00E00
ureter urothelium development (GO	0072190) 3 1 .01 + > 100 1.29E-02 1.00E00
renal vesicle induction (GO	0072034) 3 1 .01 + > 100 1.29E-02 1.00E00
negative regulation of T cell costimulation (GO	2000524) 3 1 .01 + > 100 1.29E-02 1.00E00
regulation of translation at postsynapse (GO	0140245) 3 1 .01 + > 100 1.29E-02 1.00E00
regulation of translation at postsynapse, modulating synaptic transmission (GO	0099578) 3 1 .01 + > 100 1.29E-02 1.00E00
UDP-glucuronate biosynthetic process (GO	0006065) 3 1 .01 + > 100 1.29E-02 1.00E00
UDP-N-acetylgalactosamine transmembrane transport (GO	0015789) 3 1 .01 + > 100 1.29E-02 1.00E00
UDP-glucuronic acid transmembrane transport (GO	0015787) 3 1 .01 + > 100 1.29E-02 1.00E00
negative regulation of cellular response to transforming growth factor beta stimulus (GO	1903845) 3 1 .01 + > 100 1.29E-02 1.00E00
growth plate cartilage chondrocyte growth (GO	0003430) 3 1 .01 + > 100 1.29E-02 1.00E00
formaldehyde catabolic process (GO	0046294) 3 1 .01 + > 100 1.29E-02 1.00E00
negative regulation of syncytium formation by plasma membrane fusion (GO	0034242) 3 1 .01 + > 100 1.29E-02 1.00E00
positive regulation of T cell anergy (GO	0002669) 4 1 .01 + 76.85 1.61E-02 1.00E00
metanephric nephron tubule formation (GO	0072289) 4 1 .01 + 76.85 1.61E-02 1.00E00
positive regulation of mesenchymal stem cell differentiation (GO	2000741) 4 1 .01 + 76.85 1.61E-02 1.00E00
astrocyte fate commitment (GO	0060018) 4 1 .01 + 76.85 1.61E-02 1.00E00
neural crest cell fate commitment (GO	0014034) 4 1 .01 + 76.85 1.61E-02 1.00E00
negative regulation of cilium-dependent cell motility (GO	1902020) 4 1 .01 + 76.85 1.61E-02 1.00E00
stem cell fate specification (GO	0048866) 4 1 .01 + 76.85 1.61E-02 1.00E00
negative regulation of flagellated sperm motility (GO	1901318) 4 1 .01 + 76.85 1.61E-02 1.00E00
Harderian gland development (GO	0070384) 4 1 .01 + 76.85 1.61E-02 1.00E00
vitamin E metabolic process (GO	0042360) 4 1 .01 + 76.85 1.61E-02 1.00E00
chondrocyte hypertrophy (GO	0003415) 4 1 .01 + 76.85 1.61E-02 1.00E00
positive regulation of lymphocyte anergy (GO	0002913) 4 1 .01 + 76.85 1.61E-02 1.00E00
negative regulation of cilium movement (GO	0003354) 4 1 .01 + 76.85 1.61E-02 1.00E00
prostate gland morphogenetic growth (GO	0060737) 4 1 .01 + 76.85 1.61E-02 1.00E00
UDP-glucuronate metabolic process (GO	0046398) 4 1 .01 + 76.85 1.61E-02 1.00E00
anterior head development (GO	0097065) 4 1 .01 + 76.85 1.61E-02 1.00E00
Fc receptor mediated inhibitory signaling pathway (GO	0002774) 4 1 .01 + 76.85 1.61E-02 1.00E00
negative regulation of anion channel activity (GO	0010360) 4 1 .01 + 76.85 1.61E-02 1.00E00
common bile duct development (GO	0061009) 4 1 .01 + 76.85 1.61E-02 1.00E00
formaldehyde metabolic process (GO	0046292) 4 1 .01 + 76.85 1.61E-02 1.00E00
egg activation (GO	0007343) 5 1 .02 + 61.48 1.93E-02 1.00E00
cellular response to heparin (GO	0071504) 5 1 .02 + 61.48 1.93E-02 1.00E00
UDP-N-acetylglucosamine transmembrane transport (GO	1990569) 5 1 .02 + 61.48 1.93E-02 1.00E00
positive regulation of CD8-positive, alpha-beta T cell differentiation (GO	0043378) 5 1 .02 + 61.48 1.93E-02 1.00E00
purine ribonucleoside diphosphate catabolic process (GO	0009181) 5 1 .02 + 61.48 1.93E-02 1.00E00
purine nucleoside diphosphate catabolic process (GO	0009137) 5 1 .02 + 61.48 1.93E-02 1.00E00
growth plate cartilage chondrocyte development (GO	0003431) 5 1 .02 + 61.48 1.93E-02 1.00E00
intestinal epithelial structure maintenance (GO	0060729) 5 1 .02 + 61.48 1.93E-02 1.00E00
fatty acid omega-oxidation (GO	0010430) 5 1 .02 + 61.48 1.93E-02 1.00E00
positive regulation of chondrocyte proliferation (GO	1902732) 6 1 .02 + 51.23 2.25E-02 1.00E00
meiotic chromosome condensation (GO	0010032) 6 1 .02 + 51.23 2.25E-02 1.00E00
regulation of mesenchymal stem cell differentiation (GO	2000739) 6 1 .02 + 51.23 2.25E-02 1.00E00
metanephric tubule formation (GO	0072174) 6 1 .02 + 51.23 2.25E-02 1.00E00
positive regulation of glomerular mesangial cell proliferation (GO	0072126) 6 1 .02 + 51.23 2.25E-02 1.00E00
regulation of T cell costimulation (GO	2000523) 6 1 .02 + 51.23 2.25E-02 1.00E00
regulation of translation at synapse (GO	0140243) 6 1 .02 + 51.23 2.25E-02 1.00E00
stem cell fate commitment (GO	0048865) 6 1 .02 + 51.23 2.25E-02 1.00E00
regulation of translation at synapse, modulating synaptic transmission (GO	0099547) 6 1 .02 + 51.23 2.25E-02 1.00E00
nucleoside diphosphate catabolic process (GO	0009134) 12 2 .04 + 51.23 9.19E-04 1.00E00
negative regulation of photoreceptor cell differentiation (GO	0046533) 6 1 .02 + 51.23 2.25E-02 1.00E00
regulation of branching involved in lung morphogenesis (GO	0061046) 6 1 .02 + 51.23 2.25E-02 1.00E00
regulation of T cell anergy (GO	0002667) 7 1 .02 + 43.91 2.57E-02 1.00E00
regulation of protein lipidation (GO	1903059) 7 1 .02 + 43.91 2.57E-02 1.00E00
regulation of epithelial cell proliferation involved in lung morphogenesis (GO	2000794) 7 1 .02 + 43.91 2.57E-02 1.00E00
ureter morphogenesis (GO	0072197) 7 1 .02 + 43.91 2.57E-02 1.00E00
lacrimal gland development (GO	0032808) 7 1 .02 + 43.91 2.57E-02 1.00E00
response to heparin (GO	0071503) 7 1 .02 + 43.91 2.57E-02 1.00E00
negative regulation of interleukin-4 production (GO	0032713) 7 1 .02 + 43.91 2.57E-02 1.00E00
positive regulation of cell proliferation involved in heart morphogenesis (GO	2000138) 7 1 .02 + 43.91 2.57E-02 1.00E00
regulation of CD8-positive, alpha-beta T cell differentiation (GO	0043376) 7 1 .02 + 43.91 2.57E-02 1.00E00
ribonucleoside diphosphate catabolic process (GO	0009191) 7 1 .02 + 43.91 2.57E-02 1.00E00
regulation of lymphocyte anergy (GO	0002911) 7 1 .02 + 43.91 2.57E-02 1.00E00
protein hexamerization (GO	0034214) 8 1 .03 + 38.42 2.88E-02 1.00E00
positive regulation of T cell tolerance induction (GO	0002666) 8 1 .03 + 38.42 2.88E-02 1.00E00
metanephric nephron tubule morphogenesis (GO	0072282) 8 1 .03 + 38.42 2.88E-02 1.00E00
cellular detoxification of aldehyde (GO	0110095) 8 1 .03 + 38.42 2.88E-02 1.00E00
negative regulation of interleukin-5 production (GO	0032714) 8 1 .03 + 38.42 2.88E-02 1.00E00
positive regulation of cell proliferation involved in kidney development (GO	1901724) 8 1 .03 + 38.42 2.88E-02 1.00E00
phosphatidylserine exposure on apoptotic cell surface (GO	0070782) 8 1 .03 + 38.42 2.88E-02 1.00E00
protein poly-ADP-ribosylation (GO	0070212) 8 1 .03 + 38.42 2.88E-02 1.00E00
tRNA aminoacylation for mitochondrial protein translation (GO	0070127) 8 1 .03 + 38.42 2.88E-02 1.00E00
otic vesicle formation (GO	0030916) 8 1 .03 + 38.42 2.88E-02 1.00E00
chondrocyte development involved in endochondral bone morphogenesis (GO	0003433) 8 1 .03 + 38.42 2.88E-02 1.00E00
regulation of photoreceptor cell differentiation (GO	0046532) 8 1 .03 + 38.42 2.88E-02 1.00E00
skeletal myofibril assembly (GO	0014866) 8 1 .03 + 38.42 2.88E-02 1.00E00
skeletal muscle atrophy (GO	0014732) 8 1 .03 + 38.42 2.88E-02 1.00E00
immune response-inhibiting cell surface receptor signaling pathway (GO	0002767) 8 1 .03 + 38.42 2.88E-02 1.00E00
negative regulation of pri-miRNA transcription by RNA polymerase II (GO	1902894) 16 2 .05 + 38.42 1.53E-03 1.00E00
trachea cartilage development (GO	0060534) 8 1 .03 + 38.42 2.88E-02 1.00E00
negative regulation of T cell mediated cytotoxicity (GO	0001915) 9 1 .03 + 34.15 3.20E-02 1.00E00
positive regulation of CD8-positive, alpha-beta T cell activation (GO	2001187) 9 1 .03 + 34.15 3.20E-02 1.00E00
regulation of glomerular mesangial cell proliferation (GO	0072124) 9 1 .03 + 34.15 3.20E-02 1.00E00
otic vesicle morphogenesis (GO	0071600) 9 1 .03 + 34.15 3.20E-02 1.00E00
negative regulation of mesenchymal cell apoptotic process (GO	2001054) 9 1 .03 + 34.15 3.20E-02 1.00E00
negative regulation of calcium ion import (GO	0090281) 9 1 .03 + 34.15 3.20E-02 1.00E00
positive regulation of male gonad development (GO	2000020) 9 1 .03 + 34.15 3.20E-02 1.00E00
positive regulation of kidney development (GO	0090184) 9 1 .03 + 34.15 3.20E-02 1.00E00
growth plate cartilage chondrocyte differentiation (GO	0003418) 9 1 .03 + 34.15 3.20E-02 1.00E00
striated muscle atrophy (GO	0014891) 9 1 .03 + 34.15 3.20E-02 1.00E00
bronchus development (GO	0060433) 10 1 .03 + 30.74 3.51E-02 1.00E00
metanephric tubule morphogenesis (GO	0072173) 10 1 .03 + 30.74 3.51E-02 1.00E00
positive regulation of hepatocyte proliferation (GO	2000347) 10 1 .03 + 30.74 3.51E-02 1.00E00
positive regulation of gonad development (GO	1905941) 10 1 .03 + 30.74 3.51E-02 1.00E00
regulation of male gonad development (GO	2000018) 10 1 .03 + 30.74 3.51E-02 1.00E00
positive regulation of extracellular matrix assembly (GO	1901203) 10 1 .03 + 30.74 3.51E-02 1.00E00
male sex determination (GO	0030238) 10 1 .03 + 30.74 3.51E-02 1.00E00
prostate gland growth (GO	0060736) 10 1 .03 + 30.74 3.51E-02 1.00E00
muscle atrophy (GO	0014889) 10 1 .03 + 30.74 3.51E-02 1.00E00
immune response-inhibiting signal transduction (GO	0002765) 10 1 .03 + 30.74 3.51E-02 1.00E00
regulation of anion channel activity (GO	0010359) 10 1 .03 + 30.74 3.51E-02 1.00E00
negative regulation of T cell cytokine production (GO	0002725) 10 1 .03 + 30.74 3.51E-02 1.00E00
positive regulation of tolerance induction (GO	0002645) 11 1 .04 + 27.94 3.82E-02 1.00E00
limb bud formation (GO	0060174) 11 1 .04 + 27.94 3.82E-02 1.00E00
regulation of mesenchymal cell apoptotic process (GO	2001053) 11 1 .04 + 27.94 3.82E-02 1.00E00
neural crest formation (GO	0014029) 11 1 .04 + 27.94 3.82E-02 1.00E00
pyrimidine nucleotide-sugar transmembrane transport (GO	0090481) 11 1 .04 + 27.94 3.82E-02 1.00E00
negative regulation of viral-induced cytoplasmic pattern recognition receptor signaling pathway (GO	0039532) 11 1 .04 + 27.94 3.82E-02 1.00E00
negative regulation of T cell mediated immunity (GO	0002710) 22 2 .07 + 27.94 2.73E-03 1.00E00
positive regulation of extracellular matrix organization (GO	1903055) 23 2 .07 + 26.73 2.96E-03 1.00E00
regulation of T cell tolerance induction (GO	0002664) 12 1 .04 + 25.62 4.14E-02 1.00E00
cellular response to aldehyde (GO	0110096) 12 1 .04 + 25.62 4.14E-02 1.00E00
natural killer cell differentiation (GO	0001779) 12 1 .04 + 25.62 4.14E-02 1.00E00
Sertoli cell development (GO	0060009) 12 1 .04 + 25.62 4.14E-02 1.00E00
signal peptide processing (GO	0006465) 12 1 .04 + 25.62 4.14E-02 1.00E00
protein mono-ADP-ribosylation (GO	0140289) 12 1 .04 + 25.62 4.14E-02 1.00E00
ethanol oxidation (GO	0006069) 12 1 .04 + 25.62 4.14E-02 1.00E00
nucleotide-sugar transmembrane transport (GO	0015780) 12 1 .04 + 25.62 4.14E-02 1.00E00
regulation of skeletal muscle satellite cell proliferation (GO	0014842) 12 1 .04 + 25.62 4.14E-02 1.00E00
negative regulation of fatty acid oxidation (GO	0046322) 12 1 .04 + 25.62 4.14E-02 1.00E00
regulation of fertilization (GO	0080154) 12 1 .04 + 25.62 4.14E-02 1.00E00
glial cell fate commitment (GO	0021781) 13 1 .04 + 23.65 4.45E-02 1.00E00
aldehyde catabolic process (GO	0046185) 13 1 .04 + 23.65 4.45E-02 1.00E00
retinal rod cell differentiation (GO	0060221) 13 1 .04 + 23.65 4.45E-02 1.00E00
endothelial cell morphogenesis (GO	0001886) 13 1 .04 + 23.65 4.45E-02 1.00E00
regulation of cell proliferation involved in kidney development (GO	1901722) 13 1 .04 + 23.65 4.45E-02 1.00E00
regulation of gonad development (GO	1905939) 13 1 .04 + 23.65 4.45E-02 1.00E00
skeletal muscle adaptation (GO	0043501) 13 1 .04 + 23.65 4.45E-02 1.00E00
regulation of short-term neuronal synaptic plasticity (GO	0048172) 13 1 .04 + 23.65 4.45E-02 1.00E00
regulation of skeletal muscle cell proliferation (GO	0014857) 13 1 .04 + 23.65 4.45E-02 1.00E00
heart valve formation (GO	0003188) 13 1 .04 + 23.65 4.45E-02 1.00E00
metanephros morphogenesis (GO	0003338) 27 2 .09 + 22.77 3.97E-03 1.00E00
negative regulation of activated T cell proliferation (GO	0046007) 14 1 .05 + 21.96 4.76E-02 1.00E00
otic vesicle development (GO	0071599) 14 1 .05 + 21.96 4.76E-02 1.00E00
postsynaptic modulation of chemical synaptic transmission (GO	0099170) 14 1 .05 + 21.96 4.76E-02 1.00E00
proteasome assembly (GO	0043248) 14 1 .05 + 21.96 4.76E-02 1.00E00
ruffle assembly (GO	0097178) 14 1 .05 + 21.96 4.76E-02 1.00E00
metanephric nephron tubule development (GO	0072234) 15 1 .05 + 20.49 5.07E-02 1.00E00
cellular response to nitric oxide (GO	0071732) 15 1 .05 + 20.49 5.07E-02 1.00E00
regulation of extracellular matrix assembly (GO	1901201) 15 1 .05 + 20.49 5.07E-02 1.00E00
regulation of lipoprotein metabolic process (GO	0050746) 15 1 .05 + 20.49 5.07E-02 1.00E00
chondrocyte differentiation involved in endochondral bone morphogenesis (GO	0003413) 15 1 .05 + 20.49 5.07E-02 1.00E00
cellular response to dexamethasone stimulus (GO	0071549) 31 2 .10 + 19.83 5.13E-03 1.00E00
tolerance induction (GO	0002507) 16 1 .05 + 19.21 5.37E-02 1.00E00
regulation of hepatocyte proliferation (GO	2000345) 16 1 .05 + 19.21 5.37E-02 1.00E00
regulation of cell proliferation involved in heart morphogenesis (GO	2000136) 16 1 .05 + 19.21 5.37E-02 1.00E00
engulfment of apoptotic cell (GO	0043652) 16 1 .05 + 19.21 5.37E-02 1.00E00
positive regulation of regulatory T cell differentiation (GO	0045591) 17 1 .06 + 18.08 5.68E-02 1.00E00
metanephric nephron epithelium development (GO	0072243) 17 1 .06 + 18.08 5.68E-02 1.00E00
ureter development (GO	0072189) 17 1 .06 + 18.08 5.68E-02 1.00E00
metanephric tubule development (GO	0072170) 17 1 .06 + 18.08 5.68E-02 1.00E00
nephron tubule formation (GO	0072079) 17 1 .06 + 18.08 5.68E-02 1.00E00
Sertoli cell differentiation (GO	0060008) 17 1 .06 + 18.08 5.68E-02 1.00E00
growth plate cartilage development (GO	0003417) 17 1 .06 + 18.08 5.68E-02 1.00E00
branch elongation of an epithelium (GO	0060602) 17 1 .06 + 18.08 5.68E-02 1.00E00
sex determination (GO	0007530) 17 1 .06 + 18.08 5.68E-02 1.00E00
regulation of tolerance induction (GO	0002643) 18 1 .06 + 17.08 5.99E-02 1.00E00
positive regulation of stem cell differentiation (GO	2000738) 18 1 .06 + 17.08 5.99E-02 1.00E00
regulation of myoblast fusion (GO	1901739) 18 1 .06 + 17.08 5.99E-02 1.00E00
cellular response to reactive nitrogen species (GO	1902170) 18 1 .06 + 17.08 5.99E-02 1.00E00
positive regulation of branching involved in ureteric bud morphogenesis (GO	0090190) 18 1 .06 + 17.08 5.99E-02 1.00E00
negative regulation of natural killer cell mediated cytotoxicity (GO	0045953) 18 1 .06 + 17.08 5.99E-02 1.00E00
trachea development (GO	0060438) 19 1 .06 + 16.18 6.29E-02 1.00E00
response to nitric oxide (GO	0071731) 19 1 .06 + 16.18 6.29E-02 1.00E00
regulation of CD8-positive, alpha-beta T cell activation (GO	2001185) 19 1 .06 + 16.18 6.29E-02 1.00E00
negative regulation of interleukin-10 production (GO	0032693) 19 1 .06 + 16.18 6.29E-02 1.00E00
regulation of interleukin-5 production (GO	0032674) 19 1 .06 + 16.18 6.29E-02 1.00E00
smooth muscle tissue development (GO	0048745) 19 1 .06 + 16.18 6.29E-02 1.00E00
positive regulation of chondrocyte differentiation (GO	0032332) 19 1 .06 + 16.18 6.29E-02 1.00E00
regulation of postsynaptic neurotransmitter receptor activity (GO	0098962) 19 1 .06 + 16.18 6.29E-02 1.00E00
kinetochore organization (GO	0051383) 19 1 .06 + 16.18 6.29E-02 1.00E00
notochord development (GO	0030903) 19 1 .06 + 16.18 6.29E-02 1.00E00
negative regulation of bone mineralization (GO	0030502) 19 1 .06 + 16.18 6.29E-02 1.00E00
negative regulation of cytokine production involved in inflammatory response (GO	1900016) 19 1 .06 + 16.18 6.29E-02 1.00E00
negative regulation of natural killer cell mediated immunity (GO	0002716) 19 1 .06 + 16.18 6.29E-02 1.00E00
lung epithelial cell differentiation (GO	0060487) 20 1 .07 + 15.37 6.60E-02 1.00E00
negative regulation of cellular senescence (GO	2000773) 20 1 .07 + 15.37 6.60E-02 1.00E00
metanephric epithelium development (GO	0072207) 20 1 .07 + 15.37 6.60E-02 1.00E00
response to dexamethasone (GO	0071548) 40 2 .13 + 15.37 8.20E-03 1.00E00
negative regulation of multi-organism process (GO	0043901) 20 1 .07 + 15.37 6.60E-02 1.00E00
regulation of flagellated sperm motility (GO	1901317) 20 1 .07 + 15.37 6.60E-02 1.00E00
plasma membrane phospholipid scrambling (GO	0017121) 20 1 .07 + 15.37 6.60E-02 1.00E00
maintenance of gastrointestinal epithelium (GO	0030277) 20 1 .07 + 15.37 6.60E-02 1.00E00
lung cell differentiation (GO	0060479) 21 1 .07 + 14.64 6.90E-02 1.00E00
metanephric nephron morphogenesis (GO	0072273) 21 1 .07 + 14.64 6.90E-02 1.00E00
cartilage condensation (GO	0001502) 21 1 .07 + 14.64 6.90E-02 1.00E00
ethanol metabolic process (GO	0006067) 21 1 .07 + 14.64 6.90E-02 1.00E00
regulation of branching involved in ureteric bud morphogenesis (GO	0090189) 21 1 .07 + 14.64 6.90E-02 1.00E00
negative regulation of cardiac muscle cell apoptotic process (GO	0010667) 21 1 .07 + 14.64 6.90E-02 1.00E00
heparan sulfate proteoglycan biosynthetic process (GO	0015012) 22 1 .07 + 13.97 7.20E-02 1.00E00
binding of sperm to zona pellucida (GO	0007339) 44 2 .14 + 13.97 9.78E-03 1.00E00
negative regulation of leukocyte mediated cytotoxicity (GO	0001911) 22 1 .07 + 13.97 7.20E-02 1.00E00
cell aggregation (GO	0098743) 22 1 .07 + 13.97 7.20E-02 1.00E00
prostate gland epithelium morphogenesis (GO	0060740) 22 1 .07 + 13.97 7.20E-02 1.00E00
regulation of extracellular matrix organization (GO	1903053) 45 2 .15 + 13.66 1.02E-02 1.00E00
cellular response to epidermal growth factor stimulus (GO	0071364) 45 2 .15 + 13.66 1.02E-02 1.00E00
negative regulation of lymphocyte mediated immunity (GO	0002707) 45 2 .15 + 13.66 1.02E-02 1.00E00
positive regulation of mesenchymal cell proliferation (GO	0002053) 23 1 .07 + 13.36 7.50E-02 1.00E00
negative regulation of chemokine production (GO	0032682) 23 1 .07 + 13.36 7.50E-02 1.00E00
negative regulation of chondrocyte differentiation (GO	0032331) 23 1 .07 + 13.36 7.50E-02 1.00E00
negative regulation of T cell receptor signaling pathway (GO	0050860) 23 1 .07 + 13.36 7.50E-02 1.00E00
negative regulation of defense response to virus (GO	0050687) 23 1 .07 + 13.36 7.50E-02 1.00E00
positive regulation of long-term synaptic potentiation (GO	1900273) 23 1 .07 + 13.36 7.50E-02 1.00E00
regulation of viral-induced cytoplasmic pattern recognition receptor signaling pathway (GO	0039531) 23 1 .07 + 13.36 7.50E-02 1.00E00
negative regulation of adaptive immune response based on somatic recombination of immune receptors built from immunoglobulin superfamily domains (GO	0002823) 47 2 .15 + 13.08 1.10E-02 1.00E00
cochlea morphogenesis (GO	0090103) 24 1 .08 + 12.81 7.80E-02 1.00E00
defense response to protozoan (GO	0042832) 24 1 .08 + 12.81 7.80E-02 1.00E00
nucleotide-sugar biosynthetic process (GO	0009226) 24 1 .08 + 12.81 7.80E-02 1.00E00
retinol metabolic process (GO	0042572) 48 2 .16 + 12.81 1.15E-02 1.00E00
positive regulation of alpha-beta T cell differentiation (GO	0046638) 48 2 .16 + 12.81 1.15E-02 1.00E00
negative regulation of striated muscle cell apoptotic process (GO	0010664) 24 1 .08 + 12.81 7.80E-02 1.00E00
prostate gland morphogenesis (GO	0060512) 24 1 .08 + 12.81 7.80E-02 1.00E00
response to epidermal growth factor (GO	0070849) 49 2 .16 + 12.55 1.19E-02 1.00E00
nucleobase-containing small molecule catabolic process (GO	0034656) 49 2 .16 + 12.55 1.19E-02 1.00E00
epithelial tube branching involved in lung morphogenesis (GO	0060441) 25 1 .08 + 12.30 8.10E-02 1.00E00
gastrulation with mouth forming second (GO	0001702) 25 1 .08 + 12.30 8.10E-02 1.00E00
chondrocyte development (GO	0002063) 25 1 .08 + 12.30 8.10E-02 1.00E00
response to protozoan (GO	0001562) 25 1 .08 + 12.30 8.10E-02 1.00E00
chondroitin sulfate biosynthetic process (GO	0030206) 25 1 .08 + 12.30 8.10E-02 1.00E00
endochondral bone growth (GO	0003416) 25 1 .08 + 12.30 8.10E-02 1.00E00
positive regulation of natural killer cell mediated cytotoxicity (GO	0045954) 25 1 .08 + 12.30 8.10E-02 1.00E00
negative regulation of myoblast differentiation (GO	0045662) 26 1 .08 + 11.82 8.40E-02 1.00E00
regulation of syncytium formation by plasma membrane fusion (GO	0060142) 26 1 .08 + 11.82 8.40E-02 1.00E00
natural killer cell mediated immunity (GO	0002228) 26 1 .08 + 11.82 8.40E-02 1.00E00
negative regulation of cell aging (GO	0090344) 26 1 .08 + 11.82 8.40E-02 1.00E00
astrocyte differentiation (GO	0048708) 52 2 .17 + 11.82 1.33E-02 1.00E00
negative regulation of NIK/NF-kappaB signaling (GO	1901223) 26 1 .08 + 11.82 8.40E-02 1.00E00
negative regulation of cell killing (GO	0031342) 26 1 .08 + 11.82 8.40E-02 1.00E00
developmental induction (GO	0031128) 26 1 .08 + 11.82 8.40E-02 1.00E00
axis elongation (GO	0003401) 26 1 .08 + 11.82 8.40E-02 1.00E00
negative regulation of adaptive immune response (GO	0002820) 52 2 .17 + 11.82 1.33E-02 1.00E00
negative regulation of cytokine production involved in immune response (GO	0002719) 26 1 .08 + 11.82 8.40E-02 1.00E00
negative regulation of leukocyte mediated immunity (GO	0002704) 53 2 .17 + 11.60 1.38E-02 1.00E00
regulation of pri-miRNA transcription by RNA polymerase II (GO	1902893) 53 2 .17 + 11.60 1.38E-02 1.00E00
regulation of cilium movement involved in cell motility (GO	0060295) 27 1 .09 + 11.38 8.70E-02 1.00E00
camera-type eye photoreceptor cell differentiation (GO	0060219) 27 1 .09 + 11.38 8.70E-02 1.00E00
behavioral fear response (GO	0001662) 27 1 .09 + 11.38 8.70E-02 1.00E00
regulation of AMPA receptor activity (GO	2000311) 27 1 .09 + 11.38 8.70E-02 1.00E00
regulation of cilium-dependent cell motility (GO	1902019) 27 1 .09 + 11.38 8.70E-02 1.00E00
ruffle organization (GO	0031529) 27 1 .09 + 11.38 8.70E-02 1.00E00
epithelial structure maintenance (GO	0010669) 27 1 .09 + 11.38 8.70E-02 1.00E00
striated muscle adaptation (GO	0014888) 27 1 .09 + 11.38 8.70E-02 1.00E00
regulation of necroptotic process (GO	0060544) 27 1 .09 + 11.38 8.70E-02 1.00E00
regulation of interleukin-10 production (GO	0032653) 55 2 .18 + 11.18 1.47E-02 1.00E00
apoptotic process involved in development (GO	1902742) 28 1 .09 + 10.98 8.99E-02 1.00E00
behavioral defense response (GO	0002209) 28 1 .09 + 10.98 8.99E-02 1.00E00
mitotic chromosome condensation (GO	0007076) 28 1 .09 + 10.98 8.99E-02 1.00E00
negative regulation of interleukin-2 production (GO	0032703) 28 1 .09 + 10.98 8.99E-02 1.00E00
negative regulation of interleukin-1 beta production (GO	0032691) 28 1 .09 + 10.98 8.99E-02 1.00E00
homeostasis of number of cells within a tissue (GO	0048873) 28 1 .09 + 10.98 8.99E-02 1.00E00
keratan sulfate biosynthetic process (GO	0018146) 28 1 .09 + 10.98 8.99E-02 1.00E00
bone growth (GO	0098868) 28 1 .09 + 10.98 8.99E-02 1.00E00
negative regulation of biomineral tissue development (GO	0070168) 28 1 .09 + 10.98 8.99E-02 1.00E00
heparan sulfate proteoglycan metabolic process (GO	0030201) 28 1 .09 + 10.98 8.99E-02 1.00E00
cellular response to glucocorticoid stimulus (GO	0071385) 57 2 .19 + 10.79 1.57E-02 1.00E00
negative regulation of reproductive process (GO	2000242) 57 2 .19 + 10.79 1.57E-02 1.00E00
negative regulation of osteoclast differentiation (GO	0045671) 29 1 .09 + 10.60 9.29E-02 1.00E00
negative regulation of biomineralization (GO	0110150) 29 1 .09 + 10.60 9.29E-02 1.00E00
positive regulation of excitatory postsynaptic potential (GO	2000463) 29 1 .09 + 10.60 9.29E-02 1.00E00
protein ADP-ribosylation (GO	0006471) 29 1 .09 + 10.60 9.29E-02 1.00E00
regulation of mesenchymal cell proliferation (GO	0010464) 29 1 .09 + 10.60 9.29E-02 1.00E00
negative regulation of cartilage development (GO	0061037) 29 1 .09 + 10.60 9.29E-02 1.00E00
execution phase of apoptosis (GO	0097194) 59 2 .19 + 10.42 1.68E-02 1.00E00
lung epithelium development (GO	0060428) 30 1 .10 + 10.25 9.58E-02 1.00E00
cartilage development involved in endochondral bone morphogenesis (GO	0060351) 30 1 .10 + 10.25 9.58E-02 1.00E00
T cell mediated immunity (GO	0002456) 30 1 .10 + 10.25 9.58E-02 1.00E00
protein N-linked glycosylation via asparagine (GO	0018279) 30 1 .10 + 10.25 9.58E-02 1.00E00
negative regulation of antigen receptor-mediated signaling pathway (GO	0050858) 30 1 .10 + 10.25 9.58E-02 1.00E00
ERK1 and ERK2 cascade (GO	0070371) 30 1 .10 + 10.25 9.58E-02 1.00E00
chondroitin sulfate proteoglycan biosynthetic process (GO	0050650) 30 1 .10 + 10.25 9.58E-02 1.00E00
regulation of programmed necrotic cell death (GO	0062098) 30 1 .10 + 10.25 9.58E-02 1.00E00
negative regulation of reactive oxygen species biosynthetic process (GO	1903427) 30 1 .10 + 10.25 9.58E-02 1.00E00
negative regulation of protein tyrosine kinase activity (GO	0061099) 30 1 .10 + 10.25 9.58E-02 1.00E00
positive regulation of natural killer cell mediated immunity (GO	0002717) 30 1 .10 + 10.25 9.58E-02 1.00E00
sperm-egg recognition (GO	0035036) 61 2 .20 + 10.08 1.78E-02 1.00E00
positive regulation of animal organ morphogenesis (GO	0110110) 31 1 .10 + 9.92 9.88E-02 1.00E00
regulation of interleukin-4 production (GO	0032673) 31 1 .10 + 9.92 9.88E-02 1.00E00
regulation of interleukin-2 production (GO	0032663) 62 2 .20 + 9.92 1.84E-02 1.00E00
cellular response to corticosteroid stimulus (GO	0071384) 62 2 .20 + 9.92 1.84E-02 1.00E00
positive regulation of protein targeting to membrane (GO	0090314) 31 1 .10 + 9.92 9.88E-02 1.00E00
peptidyl-asparagine modification (GO	0018196) 31 1 .10 + 9.92 9.88E-02 1.00E00
regulation of kidney development (GO	0090183) 31 1 .10 + 9.92 9.88E-02 1.00E00
positive regulation of CD4-positive, alpha-beta T cell differentiation (GO	0043372) 31 1 .10 + 9.92 9.88E-02 1.00E00
fear response (GO	0042596) 31 1 .10 + 9.92 9.88E-02 1.00E00
cAMP-mediated signaling (GO	0019933) 31 1 .10 + 9.92 9.88E-02 1.00E00
regulation of cardiac muscle cell apoptotic process (GO	0010665) 31 1 .10 + 9.92 9.88E-02 1.00E00
positive regulation of cartilage development (GO	0061036) 31 1 .10 + 9.92 9.88E-02 1.00E00
aortic valve morphogenesis (GO	0003180) 31 1 .10 + 9.92 9.88E-02 1.00E00
regulation of regulatory T cell differentiation (GO	0045589) 32 1 .10 + 9.61 1.02E-01 1.00E00
metanephric nephron development (GO	0072210) 32 1 .10 + 9.61 1.02E-01 1.00E00
muscle adaptation (GO	0043500) 32 1 .10 + 9.61 1.02E-01 1.00E00
negative regulation of protein localization to nucleus (GO	1900181) 32 1 .10 + 9.61 1.02E-01 1.00E00
response to interferon-beta (GO	0035456) 32 1 .10 + 9.61 1.02E-01 1.00E00
epithelial cell morphogenesis (GO	0003382) 32 1 .10 + 9.61 1.02E-01 1.00E00
positive regulation of alpha-beta T cell activation (GO	0046635) 65 2 .21 + 9.46 2.00E-02 1.00E00
positive regulation of interleukin-2 production (GO	0032743) 33 1 .11 + 9.31 1.05E-01 1.00E00
response to ATP (GO	0033198) 33 1 .11 + 9.31 1.05E-01 1.00E00
quinone metabolic process (GO	1901661) 33 1 .11 + 9.31 1.05E-01 1.00E00
negative regulation of anion transmembrane transport (GO	1903960) 33 1 .11 + 9.31 1.05E-01 1.00E00
keratan sulfate metabolic process (GO	0042339) 33 1 .11 + 9.31 1.05E-01 1.00E00
regulation of alpha-beta T cell differentiation (GO	0046637) 66 2 .21 + 9.31 2.06E-02 1.00E00
endocardial cushion morphogenesis (GO	0003203) 33 1 .11 + 9.31 1.05E-01 1.00E00
regulation of fatty acid oxidation (GO	0046320) 33 1 .11 + 9.31 1.05E-01 1.00E00
regulation of T cell cytokine production (GO	0002724) 33 1 .11 + 9.31 1.05E-01 1.00E00
negative regulation of neuron differentiation (GO	0045665) 68 2 .22 + 9.04 2.17E-02 1.00E00
negative regulation of interleukin-1 production (GO	0032692) 34 1 .11 + 9.04 1.08E-01 1.00E00
skeletal muscle tissue regeneration (GO	0043403) 34 1 .11 + 9.04 1.08E-01 1.00E00
regulation of striated muscle cell apoptotic process (GO	0010662) 34 1 .11 + 9.04 1.08E-01 1.00E00
intra-Golgi vesicle-mediated transport (GO	0006891) 35 1 .11 + 8.78 1.10E-01 1.00E00
smooth muscle cell differentiation (GO	0051145) 35 1 .11 + 8.78 1.10E-01 1.00E00
purine ribonucleotide catabolic process (GO	0009154) 35 1 .11 + 8.78 1.10E-01 1.00E00
astrocyte development (GO	0014002) 36 1 .12 + 8.54 1.13E-01 1.00E00
cellular response to estradiol stimulus (GO	0071392) 36 1 .12 + 8.54 1.13E-01 1.00E00
positive regulation of morphogenesis of an epithelium (GO	1905332) 36 1 .12 + 8.54 1.13E-01 1.00E00
negative regulation of muscle cell apoptotic process (GO	0010656) 36 1 .12 + 8.54 1.13E-01 1.00E00
negative regulation of fatty acid metabolic process (GO	0045922) 36 1 .12 + 8.54 1.13E-01 1.00E00
aortic valve development (GO	0003176) 36 1 .12 + 8.54 1.13E-01 1.00E00
positive regulation of CD4-positive, alpha-beta T cell activation (GO	2000516) 37 1 .12 + 8.31 1.16E-01 1.00E00
positive regulation of interleukin-10 production (GO	0032733) 37 1 .12 + 8.31 1.16E-01 1.00E00
regulation of protein targeting to membrane (GO	0090313) 37 1 .12 + 8.31 1.16E-01 1.00E00
regulation of T cell mediated cytotoxicity (GO	0001914) 38 1 .12 + 8.09 1.19E-01 1.00E00
prostate gland development (GO	0030850) 38 1 .12 + 8.09 1.19E-01 1.00E00
nucleotide-sugar metabolic process (GO	0009225) 38 1 .12 + 8.09 1.19E-01 1.00E00
negative regulation of ossification (GO	0030279) 38 1 .12 + 8.09 1.19E-01 1.00E00
chondroitin sulfate metabolic process (GO	0030204) 38 1 .12 + 8.09 1.19E-01 1.00E00
regulation of cilium movement (GO	0003352) 38 1 .12 + 8.09 1.19E-01 1.00E00
metanephros development (GO	0001656) 78 2 .25 + 7.88 2.78E-02 1.00E00
negative regulation of extrinsic apoptotic signaling pathway via death domain receptors (GO	1902042) 39 1 .13 + 7.88 1.22E-01 1.00E00
carbohydrate transport (GO	0008643) 78 2 .25 + 7.88 2.78E-02 1.00E00
exocrine system development (GO	0035272) 39 1 .13 + 7.88 1.22E-01 1.00E00
regulation of T cell mediated immunity (GO	0002709) 78 2 .25 + 7.88 2.78E-02 1.00E00
negative regulation of production of molecular mediator of immune response (GO	0002701) 39 1 .13 + 7.88 1.22E-01 1.00E00
cell-cell recognition (GO	0009988) 79 2 .26 + 7.78 2.85E-02 1.00E00
regulation of activated T cell proliferation (GO	0046006) 40 1 .13 + 7.68 1.25E-01 1.00E00
fat-soluble vitamin metabolic process (GO	0006775) 40 1 .13 + 7.68 1.25E-01 1.00E00
negative regulation of interferon-gamma production (GO	0032689) 40 1 .13 + 7.68 1.25E-01 1.00E00
mitochondrial RNA metabolic process (GO	0000959) 40 1 .13 + 7.68 1.25E-01 1.00E00
protein kinase B signaling (GO	0043491) 40 1 .13 + 7.68 1.25E-01 1.00E00
intraciliary transport involved in cilium assembly (GO	0035735) 40 1 .13 + 7.68 1.25E-01 1.00E00
ribonucleotide catabolic process (GO	0009261) 40 1 .13 + 7.68 1.25E-01 1.00E00
regulation of necrotic cell death (GO	0010939) 40 1 .13 + 7.68 1.25E-01 1.00E00
kidney morphogenesis (GO	0060993) 81 2 .26 + 7.59 2.98E-02 1.00E00
regulation of T cell receptor signaling pathway (GO	0050856) 41 1 .13 + 7.50 1.28E-01 1.00E00
vitamin transport (GO	0051180) 41 1 .13 + 7.50 1.28E-01 1.00E00
semi-lunar valve development (GO	1905314) 41 1 .13 + 7.50 1.28E-01 1.00E00
B cell proliferation (GO	0042100) 41 1 .13 + 7.50 1.28E-01 1.00E00
nucleoside phosphate catabolic process (GO	1901292) 83 2 .27 + 7.41 3.11E-02 1.00E00
negative regulation of immune effector process (GO	0002698) 125 3 .41 + 7.38 8.34E-03 1.00E00
lung morphogenesis (GO	0060425) 42 1 .14 + 7.32 1.30E-01 1.00E00
response to testosterone (GO	0033574) 42 1 .14 + 7.32 1.30E-01 1.00E00
branching involved in ureteric bud morphogenesis (GO	0001658) 42 1 .14 + 7.32 1.30E-01 1.00E00
potassium ion import across plasma membrane (GO	1990573) 42 1 .14 + 7.32 1.30E-01 1.00E00
regulation of calcium ion import (GO	0090279) 42 1 .14 + 7.32 1.30E-01 1.00E00
nucleoside diphosphate metabolic process (GO	0009132) 84 2 .27 + 7.32 3.18E-02 1.00E00
endocrine pancreas development (GO	0031018) 42 1 .14 + 7.32 1.30E-01 1.00E00
primary alcohol metabolic process (GO	0034308) 85 2 .28 + 7.23 3.25E-02 1.00E00
regulation of cellular senescence (GO	2000772) 43 1 .14 + 7.15 1.33E-01 1.00E00
cell fate determination (GO	0001709) 43 1 .14 + 7.15 1.33E-01 1.00E00
DNA replication initiation (GO	0006270) 43 1 .14 + 7.15 1.33E-01 1.00E00
chondroitin sulfate proteoglycan metabolic process (GO	0050654) 43 1 .14 + 7.15 1.33E-01 1.00E00
regulation of natural killer cell mediated cytotoxicity (GO	0042269) 43 1 .14 + 7.15 1.33E-01 1.00E00
endocardial cushion development (GO	0003197) 43 1 .14 + 7.15 1.33E-01 1.00E00
negative regulation of interleukin-6 production (GO	0032715) 44 1 .14 + 6.99 1.36E-01 1.00E00
negative regulation of epithelial cell differentiation (GO	0030857) 44 1 .14 + 6.99 1.36E-01 1.00E00
apoptotic cell clearance (GO	0043277) 44 1 .14 + 6.99 1.36E-01 1.00E00
response to pH (GO	0009268) 44 1 .14 + 6.99 1.36E-01 1.00E00
positive regulation of T cell differentiation (GO	0045582) 89 2 .29 + 6.91 3.53E-02 1.00E00
modulation of excitatory postsynaptic potential (GO	0098815) 45 1 .15 + 6.83 1.39E-01 1.00E00
regulation of long-term synaptic potentiation (GO	1900271) 45 1 .15 + 6.83 1.39E-01 1.00E00
negative regulation of I-kappaB kinase/NF-kappaB signaling (GO	0043124) 45 1 .15 + 6.83 1.39E-01 1.00E00
positive regulation of phosphatidylinositol 3-kinase signaling (GO	0014068) 91 2 .30 + 6.76 3.67E-02 1.00E00
negative regulation of osteoblast differentiation (GO	0045668) 46 1 .15 + 6.68 1.42E-01 1.00E00
negative regulation of T cell differentiation (GO	0045581) 46 1 .15 + 6.68 1.42E-01 1.00E00
phospholipid translocation (GO	0045332) 46 1 .15 + 6.68 1.42E-01 1.00E00
tRNA aminoacylation for protein translation (GO	0006418) 46 1 .15 + 6.68 1.42E-01 1.00E00
purine nucleotide catabolic process (GO	0006195) 46 1 .15 + 6.68 1.42E-01 1.00E00
regulation of neuronal synaptic plasticity (GO	0048168) 46 1 .15 + 6.68 1.42E-01 1.00E00
negative regulation of epithelial cell apoptotic process (GO	1904036) 46 1 .15 + 6.68 1.42E-01 1.00E00
cellular response to ketone (GO	1901655) 93 2 .30 + 6.61 3.81E-02 1.00E00
eye photoreceptor cell differentiation (GO	0001754) 47 1 .15 + 6.54 1.45E-01 1.00E00
purinergic nucleotide receptor signaling pathway (GO	0035590) 47 1 .15 + 6.54 1.45E-01 1.00E00
regulation of natural killer cell mediated immunity (GO	0002715) 47 1 .15 + 6.54 1.45E-01 1.00E00
intracellular pH reduction (GO	0051452) 48 1 .16 + 6.40 1.47E-01 1.00E00
intermembrane lipid transfer (GO	0120009) 48 1 .16 + 6.40 1.47E-01 1.00E00
regulation of cytokine production involved in inflammatory response (GO	1900015) 48 1 .16 + 6.40 1.47E-01 1.00E00
Wnt signaling pathway, planar cell polarity pathway (GO	0060071) 97 2 .32 + 6.34 4.11E-02 1.00E00
lipid translocation (GO	0034204) 49 1 .16 + 6.27 1.50E-01 1.00E00
ADP metabolic process (GO	0046031) 49 1 .16 + 6.27 1.50E-01 1.00E00
mesenchyme morphogenesis (GO	0072132) 49 1 .16 + 6.27 1.50E-01 1.00E00
cochlea development (GO	0090102) 49 1 .16 + 6.27 1.50E-01 1.00E00
tRNA aminoacylation (GO	0043039) 49 1 .16 + 6.27 1.50E-01 1.00E00
negative regulation of response to biotic stimulus (GO	0002832) 98 2 .32 + 6.27 4.18E-02 1.00E00
epidermal growth factor receptor signaling pathway (GO	0007173) 50 1 .16 + 6.15 1.53E-01 1.00E00
T cell differentiation in thymus (GO	0033077) 50 1 .16 + 6.15 1.53E-01 1.00E00
regulation of cell aging (GO	0090342) 50 1 .16 + 6.15 1.53E-01 1.00E00
glycosaminoglycan biosynthetic process (GO	0006024) 100 2 .33 + 6.15 4.34E-02 1.00E00
regulation of CD4-positive, alpha-beta T cell differentiation (GO	0043370) 50 1 .16 + 6.15 1.53E-01 1.00E00
amino acid activation (GO	0043038) 50 1 .16 + 6.15 1.53E-01 1.00E00
regulation of morphogenesis of a branching structure (GO	0060688) 50 1 .16 + 6.15 1.53E-01 1.00E00
ureteric bud morphogenesis (GO	0060675) 50 1 .16 + 6.15 1.53E-01 1.00E00
regulation of alpha-beta T cell activation (GO	0046634) 101 2 .33 + 6.09 4.41E-02 1.00E00
positive regulation of lymphocyte differentiation (GO	0045621) 102 2 .33 + 6.03 4.49E-02 1.00E00
mesonephric tubule morphogenesis (GO	0072171) 51 1 .17 + 6.03 1.56E-01 1.00E00
regulation of chondrocyte differentiation (GO	0032330) 51 1 .17 + 6.03 1.56E-01 1.00E00
negative regulation of myeloid leukocyte differentiation (GO	0002762) 51 1 .17 + 6.03 1.56E-01 1.00E00
pH reduction (GO	0045851) 51 1 .17 + 6.03 1.56E-01 1.00E00
purine-containing compound catabolic process (GO	0072523) 51 1 .17 + 6.03 1.56E-01 1.00E00
regulation of myoblast differentiation (GO	0045661) 52 1 .17 + 5.91 1.58E-01 1.00E00
regulation of multi-organism process (GO	0043900) 52 1 .17 + 5.91 1.58E-01 1.00E00
cyclic-nucleotide-mediated signaling (GO	0019935) 52 1 .17 + 5.91 1.58E-01 1.00E00
endothelial cell development (GO	0001885) 53 1 .17 + 5.80 1.61E-01 1.00E00
negative regulation of peptidyl-tyrosine phosphorylation (GO	0050732) 53 1 .17 + 5.80 1.61E-01 1.00E00
chromosome condensation (GO	0030261) 53 1 .17 + 5.80 1.61E-01 1.00E00
intraciliary transport (GO	0042073) 53 1 .17 + 5.80 1.61E-01 1.00E00
aminoglycan biosynthetic process (GO	0006023) 107 2 .35 + 5.75 4.88E-02 1.00E00
negative regulation of lymphocyte differentiation (GO	0045620) 54 1 .18 + 5.69 1.64E-01 1.00E00
retinoid metabolic process (GO	0001523) 108 2 .35 + 5.69 4.96E-02 1.00E00
myofibril assembly (GO	0030239) 54 1 .18 + 5.69 1.64E-01 1.00E00
regulation of microtubule-based movement (GO	0060632) 54 1 .18 + 5.69 1.64E-01 1.00E00
heart valve morphogenesis (GO	0003179) 54 1 .18 + 5.69 1.64E-01 1.00E00
regulation of reproductive process (GO	2000241) 163 3 .53 + 5.66 1.68E-02 1.00E00
mucopolysaccharide metabolic process (GO	1903510) 109 2 .35 + 5.64 5.04E-02 1.00E00
positive regulation of leukocyte mediated cytotoxicity (GO	0001912) 55 1 .18 + 5.59 1.67E-01 1.00E00
positive regulation of epithelial cell differentiation (GO	0030858) 55 1 .18 + 5.59 1.67E-01 1.00E00
natural killer cell activation (GO	0030101) 55 1 .18 + 5.59 1.67E-01 1.00E00
mRNA export from nucleus (GO	0006406) 111 2 .36 + 5.54 5.21E-02 1.00E00
mRNA-containing ribonucleoprotein complex export from nucleus (GO	0071427) 111 2 .36 + 5.54 5.21E-02 1.00E00
alcohol catabolic process (GO	0046164) 56 1 .18 + 5.49 1.69E-01 1.00E00
negative regulation of reactive oxygen species metabolic process (GO	2000378) 56 1 .18 + 5.49 1.69E-01 1.00E00
regulation of cardiac conduction (GO	1903779) 56 1 .18 + 5.49 1.69E-01 1.00E00
regulation of stem cell differentiation (GO	2000736) 113 2 .37 + 5.44 5.37E-02 1.00E00
endochondral bone morphogenesis (GO	0060350) 57 1 .19 + 5.39 1.72E-01 1.00E00
regulation of extrinsic apoptotic signaling pathway via death domain receptors (GO	1902041) 57 1 .19 + 5.39 1.72E-01 1.00E00
cellular aldehyde metabolic process (GO	0006081) 57 1 .19 + 5.39 1.72E-01 1.00E00
regulation of establishment of planar polarity (GO	0090175) 114 2 .37 + 5.39 5.46E-02 1.00E00
diterpenoid metabolic process (GO	0016101) 114 2 .37 + 5.39 5.46E-02 1.00E00
regulation of membrane lipid distribution (GO	0097035) 57 1 .19 + 5.39 1.72E-01 1.00E00
stimulatory C-type lectin receptor signaling pathway (GO	0002223) 115 2 .37 + 5.35 5.54E-02 1.00E00
nucleobase-containing small molecule biosynthetic process (GO	0034404) 115 2 .37 + 5.35 5.54E-02 1.00E00
negative regulation of calcium ion transport (GO	0051926) 59 1 .19 + 5.21 1.77E-01 1.00E00
innate immune response activating cell surface receptor signaling pathway (GO	0002220) 119 2 .39 + 5.17 5.88E-02 1.00E00
photoreceptor cell differentiation (GO	0046530) 60 1 .20 + 5.12 1.80E-01 1.00E00
proteoglycan biosynthetic process (GO	0030166) 60 1 .20 + 5.12 1.80E-01 1.00E00
innate immune response-activating signal transduction (GO	0002758) 120 2 .39 + 5.12 5.96E-02 1.00E00
regulation of animal organ morphogenesis (GO	2000027) 181 3 .59 + 5.09 2.20E-02 1.00E00
regulation of I-kappaB kinase/NF-kappaB signaling (GO	0043122) 243 4 .79 + 5.06 8.48E-03 1.00E00
nephron tubule morphogenesis (GO	0072078) 61 1 .20 + 5.04 1.83E-01 1.00E00
retina morphogenesis in camera-type eye (GO	0060042) 61 1 .20 + 5.04 1.83E-01 1.00E00
positive regulation of I-kappaB kinase/NF-kappaB signaling (GO	0043123) 185 3 .60 + 4.98 2.32E-02 1.00E00
terpenoid metabolic process (GO	0006721) 124 2 .40 + 4.96 6.31E-02 1.00E00
purine ribonucleoside diphosphate metabolic process (GO	0009179) 62 1 .20 + 4.96 1.85E-01 1.00E00
purine nucleoside diphosphate metabolic process (GO	0009135) 62 1 .20 + 4.96 1.85E-01 1.00E00
regulation of tumor necrosis factor-mediated signaling pathway (GO	0010803) 62 1 .20 + 4.96 1.85E-01 1.00E00
regulation of muscle cell apoptotic process (GO	0010660) 62 1 .20 + 4.96 1.85E-01 1.00E00
tumor necrosis factor-mediated signaling pathway (GO	0033209) 125 2 .41 + 4.92 6.40E-02 1.00E00
G1/S transition of mitotic cell cycle (GO	0000082) 125 2 .41 + 4.92 6.40E-02 1.00E00
nephron epithelium morphogenesis (GO	0072088) 63 1 .20 + 4.88 1.88E-01 1.00E00
regulation of phosphatidylinositol 3-kinase signaling (GO	0014066) 126 2 .41 + 4.88 6.49E-02 1.00E00
regulation of morphogenesis of an epithelium (GO	1905330) 63 1 .20 + 4.88 1.88E-01 1.00E00
COPII vesicle coating (GO	0048208) 63 1 .20 + 4.88 1.88E-01 1.00E00
vesicle targeting, rough ER to cis-Golgi (GO	0048207) 63 1 .20 + 4.88 1.88E-01 1.00E00
stem cell population maintenance (GO	0019827) 126 2 .41 + 4.88 6.49E-02 1.00E00
heart valve development (GO	0003170) 63 1 .20 + 4.88 1.88E-01 1.00E00
cell cycle G1/S phase transition (GO	0044843) 127 2 .41 + 4.84 6.58E-02 1.00E00
ribonucleoprotein complex export from nucleus (GO	0071426) 127 2 .41 + 4.84 6.58E-02 1.00E00
nephron morphogenesis (GO	0072028) 64 1 .21 + 4.80 1.91E-01 1.00E00
ribonucleoprotein complex localization (GO	0071166) 128 2 .42 + 4.80 6.67E-02 1.00E00
regulation of antigen receptor-mediated signaling pathway (GO	0050854) 64 1 .21 + 4.80 1.91E-01 1.00E00
maintenance of cell number (GO	0098727) 128 2 .42 + 4.80 6.67E-02 1.00E00
tissue regeneration (GO	0042246) 64 1 .21 + 4.80 1.91E-01 1.00E00
negative regulation of innate immune response (GO	0045824) 64 1 .21 + 4.80 1.91E-01 1.00E00
cellular hormone metabolic process (GO	0034754) 129 2 .42 + 4.77 6.75E-02 1.00E00
multicellular organismal response to stress (GO	0033555) 65 1 .21 + 4.73 1.93E-01 1.00E00
regulation of cellular amino acid metabolic process (GO	0006521) 65 1 .21 + 4.73 1.93E-01 1.00E00
response to fatty acid (GO	0070542) 65 1 .21 + 4.73 1.93E-01 1.00E00
pre-replicative complex assembly (GO	0036388) 65 1 .21 + 4.73 1.93E-01 1.00E00
ribonucleoside diphosphate metabolic process (GO	0009185) 65 1 .21 + 4.73 1.93E-01 1.00E00
renal tubule morphogenesis (GO	0061333) 65 1 .21 + 4.73 1.93E-01 1.00E00
somatic stem cell population maintenance (GO	0035019) 65 1 .21 + 4.73 1.93E-01 1.00E00
regulation of CD4-positive, alpha-beta T cell activation (GO	2000514) 66 1 .21 + 4.66 1.96E-01 1.00E00
cellular response to retinoic acid (GO	0071300) 66 1 .21 + 4.66 1.96E-01 1.00E00
negative regulation of signaling receptor activity (GO	2000272) 66 1 .21 + 4.66 1.96E-01 1.00E00
vesicle coating (GO	0006901) 67 1 .22 + 4.59 1.98E-01 1.00E00
regulation of osteoclast differentiation (GO	0045670) 67 1 .22 + 4.59 1.98E-01 1.00E00
receptor internalization (GO	0031623) 67 1 .22 + 4.59 1.98E-01 1.00E00
RNA export from nucleus (GO	0006405) 135 2 .44 + 4.55 7.30E-02 1.00E00
non-canonical Wnt signaling pathway (GO	0035567) 135 2 .44 + 4.55 7.30E-02 1.00E00
type I interferon signaling pathway (GO	0060337) 68 1 .22 + 4.52 2.01E-01 1.00E00
chondrocyte differentiation (GO	0002062) 68 1 .22 + 4.52 2.01E-01 1.00E00
protein transport along microtubule (GO	0098840) 68 1 .22 + 4.52 2.01E-01 1.00E00
microtubule-based protein transport (GO	0099118) 68 1 .22 + 4.52 2.01E-01 1.00E00
chromosome organization involved in meiotic cell cycle (GO	0070192) 68 1 .22 + 4.52 2.01E-01 1.00E00
lysosome organization (GO	0007040) 69 1 .22 + 4.45 2.04E-01 1.00E00
cellular response to type I interferon (GO	0071357) 69 1 .22 + 4.45 2.04E-01 1.00E00
neural retina development (GO	0003407) 69 1 .22 + 4.45 2.04E-01 1.00E00
negative regulation of T cell proliferation (GO	0042130) 69 1 .22 + 4.45 2.04E-01 1.00E00
lytic vacuole organization (GO	0080171) 69 1 .22 + 4.45 2.04E-01 1.00E00
epithelial to mesenchymal transition (GO	0001837) 70 1 .23 + 4.39 2.06E-01 1.00E00
ERBB signaling pathway (GO	0038127) 70 1 .23 + 4.39 2.06E-01 1.00E00
COPII-coated vesicle budding (GO	0090114) 70 1 .23 + 4.39 2.06E-01 1.00E00
vesicle targeting, to, from or within Golgi (GO	0048199) 70 1 .23 + 4.39 2.06E-01 1.00E00
limb morphogenesis (GO	0035108) 140 2 .46 + 4.39 7.77E-02 1.00E00
appendage morphogenesis (GO	0035107) 140 2 .46 + 4.39 7.77E-02 1.00E00
regulation of cartilage development (GO	0061035) 70 1 .23 + 4.39 2.06E-01 1.00E00
vasculogenesis (GO	0001570) 71 1 .23 + 4.33 2.09E-01 1.00E00
cellular response to steroid hormone stimulus (GO	0071383) 142 2 .46 + 4.33 7.95E-02 1.00E00
regulation of defense response to virus (GO	0050688) 71 1 .23 + 4.33 2.09E-01 1.00E00
pancreas development (GO	0031016) 71 1 .23 + 4.33 2.09E-01 1.00E00
isoprenoid metabolic process (GO	0006720) 143 2 .47 + 4.30 8.05E-02 1.00E00
response to glucocorticoid (GO	0051384) 143 2 .47 + 4.30 8.05E-02 1.00E00
oligodendrocyte differentiation (GO	0048709) 72 1 .23 + 4.27 2.11E-01 1.00E00
regulation of nervous system process (GO	0031644) 144 2 .47 + 4.27 8.14E-02 1.00E00
positive regulation of cell killing (GO	0031343) 72 1 .23 + 4.27 2.11E-01 1.00E00
positive regulation of T cell activation (GO	0050870) 217 3 .71 + 4.25 3.47E-02 1.00E00
nucleotide catabolic process (GO	0009166) 73 1 .24 + 4.21 2.14E-01 1.00E00
organ growth (GO	0035265) 73 1 .24 + 4.21 2.14E-01 1.00E00
regulation of T cell differentiation (GO	0045580) 148 2 .48 + 4.15 8.53E-02 1.00E00
hair follicle development (GO	0001942) 74 1 .24 + 4.15 2.17E-01 1.00E00
carbohydrate derivative transport (GO	1901264) 74 1 .24 + 4.15 2.17E-01 1.00E00
digestive system process (GO	0022600) 74 1 .24 + 4.15 2.17E-01 1.00E00
activation of innate immune response (GO	0002218) 149 2 .48 + 4.13 8.63E-02 1.00E00
organophosphate catabolic process (GO	0046434) 149 2 .48 + 4.13 8.63E-02 1.00E00
protein N-linked glycosylation (GO	0006487) 75 1 .24 + 4.10 2.19E-01 1.00E00
regulation of hematopoietic stem cell differentiation (GO	1902036) 75 1 .24 + 4.10 2.19E-01 1.00E00
negative regulation of ion transmembrane transporter activity (GO	0032413) 75 1 .24 + 4.10 2.19E-01 1.00E00
regulation of bone mineralization (GO	0030500) 75 1 .24 + 4.10 2.19E-01 1.00E00
response to type I interferon (GO	0034340) 75 1 .24 + 4.10 2.19E-01 1.00E00
single fertilization (GO	0007338) 151 2 .49 + 4.07 8.82E-02 1.00E00
antigen processing and presentation of exogenous peptide antigen via MHC class I, TAP-dependent (GO	0002479) 76 1 .25 + 4.04 2.22E-01 1.00E00
protein export from nucleus (GO	0006611) 152 2 .49 + 4.04 8.92E-02 1.00E00
nephron tubule development (GO	0072080) 76 1 .25 + 4.04 2.22E-01 1.00E00
glycosaminoglycan metabolic process (GO	0030203) 152 2 .49 + 4.04 8.92E-02 1.00E00
positive regulation of leukocyte differentiation (GO	1902107) 154 2 .50 + 3.99 9.12E-02 1.00E00
positive regulation of hemopoiesis (GO	1903708) 154 2 .50 + 3.99 9.12E-02 1.00E00
cellular ketone metabolic process (GO	0042180) 77 1 .25 + 3.99 2.24E-01 1.00E00
skin epidermis development (GO	0098773) 78 1 .25 + 3.94 2.27E-01 1.00E00
regulation of transcription from RNA polymerase II promoter in response to hypoxia (GO	0061418) 78 1 .25 + 3.94 2.27E-01 1.00E00
hair cycle process (GO	0022405) 78 1 .25 + 3.94 2.27E-01 1.00E00
molting cycle process (GO	0022404) 78 1 .25 + 3.94 2.27E-01 1.00E00
regulation of adaptive immune response based on somatic recombination of immune receptors built from immunoglobulin superfamily domains (GO	0002822) 156 2 .51 + 3.94 9.31E-02 1.00E00
positive regulation of neuron projection development (GO	0010976) 157 2 .51 + 3.92 9.41E-02 1.00E00
regulation of lymphocyte mediated immunity (GO	0002706) 157 2 .51 + 3.92 9.41E-02 1.00E00
regulation of leukocyte mediated cytotoxicity (GO	0001910) 79 1 .26 + 3.89 2.29E-01 1.00E00
regulation of transcription initiation from RNA polymerase II promoter (GO	0060260) 79 1 .26 + 3.89 2.29E-01 1.00E00
neural crest cell development (GO	0014032) 79 1 .26 + 3.89 2.29E-01 1.00E00
organic hydroxy compound catabolic process (GO	1901616) 79 1 .26 + 3.89 2.29E-01 1.00E00
cellular response to mechanical stimulus (GO	0071260) 79 1 .26 + 3.89 2.29E-01 1.00E00
lymphocyte proliferation (GO	0046651) 79 1 .26 + 3.89 2.29E-01 1.00E00
positive regulation of leukocyte cell-cell adhesion (GO	1903039) 238 3 .77 + 3.87 4.35E-02 1.00E00
mRNA transport (GO	0051028) 159 2 .52 + 3.87 9.61E-02 1.00E00
ureteric bud development (GO	0001657) 80 1 .26 + 3.84 2.32E-01 1.00E00
renal tubule development (GO	0061326) 80 1 .26 + 3.84 2.32E-01 1.00E00
response to corticosteroid (GO	0031960) 161 2 .52 + 3.82 9.82E-02 1.00E00
vesicle fusion (GO	0006906) 81 1 .26 + 3.79 2.34E-01 1.00E00
mesonephric tubule development (GO	0072164) 81 1 .26 + 3.79 2.34E-01 1.00E00
mesonephric epithelium development (GO	0072163) 81 1 .26 + 3.79 2.34E-01 1.00E00
mononuclear cell proliferation (GO	0032943) 81 1 .26 + 3.79 2.34E-01 1.00E00
cell fate specification (GO	0001708) 81 1 .26 + 3.79 2.34E-01 1.00E00
NIK/NF-kappaB signaling (GO	0038061) 81 1 .26 + 3.79 2.34E-01 1.00E00
antigen processing and presentation of exogenous peptide antigen via MHC class I (GO	0042590) 81 1 .26 + 3.79 2.34E-01 1.00E00
positive regulation of NF-kappaB transcription factor activity (GO	0051092) 163 2 .53 + 3.77 1.00E-01 1.00E00
stem cell development (GO	0048864) 82 1 .27 + 3.75 2.37E-01 1.00E00
B cell activation (GO	0042113) 164 2 .53 + 3.75 1.01E-01 1.00E00
protein localization to nucleus (GO	0034504) 164 2 .53 + 3.75 1.01E-01 1.00E00
endothelial cell differentiation (GO	0045446) 83 1 .27 + 3.70 2.39E-01 1.00E00
regulation of cellular amine metabolic process (GO	0033238) 83 1 .27 + 3.70 2.39E-01 1.00E00
mesenchymal cell development (GO	0014031) 83 1 .27 + 3.70 2.39E-01 1.00E00
positive regulation of reproductive process (GO	2000243) 83 1 .27 + 3.70 2.39E-01 1.00E00
inorganic ion import across plasma membrane (GO	0099587) 83 1 .27 + 3.70 2.39E-01 1.00E00
negative regulation of transporter activity (GO	0032410) 83 1 .27 + 3.70 2.39E-01 1.00E00
aminoglycan metabolic process (GO	0006022) 166 2 .54 + 3.70 1.03E-01 1.00E00
nuclear export (GO	0051168) 166 2 .54 + 3.70 1.03E-01 1.00E00
inorganic cation import across plasma membrane (GO	0098659) 83 1 .27 + 3.70 2.39E-01 1.00E00
lung development (GO	0030324) 166 2 .54 + 3.70 1.03E-01 1.00E00
regulation of epithelial cell apoptotic process (GO	1904035) 83 1 .27 + 3.70 2.39E-01 1.00E00
regulation of protein targeting (GO	1903533) 83 1 .27 + 3.70 2.39E-01 1.00E00
fatty acid oxidation (GO	0019395) 84 1 .27 + 3.66 2.42E-01 1.00E00
negative regulation of myeloid cell differentiation (GO	0045638) 84 1 .27 + 3.66 2.42E-01 1.00E00
developmental cell growth (GO	0048588) 84 1 .27 + 3.66 2.42E-01 1.00E00
negative regulation of lymphocyte proliferation (GO	0050672) 84 1 .27 + 3.66 2.42E-01 1.00E00
negative regulation of autophagy (GO	0010507) 84 1 .27 + 3.66 2.42E-01 1.00E00
nucleobase-containing compound transport (GO	0015931) 253 3 .82 + 3.64 5.05E-02 1.00E00
mesonephros development (GO	0001823) 85 1 .28 + 3.62 2.44E-01 1.00E00
negative regulation of mononuclear cell proliferation (GO	0032945) 85 1 .28 + 3.62 2.44E-01 1.00E00
proteoglycan metabolic process (GO	0006029) 85 1 .28 + 3.62 2.44E-01 1.00E00
respiratory tube development (GO	0030323) 170 2 .55 + 3.62 1.07E-01 1.00E00
glial cell differentiation (GO	0010001) 171 2 .56 + 3.60 1.08E-01 1.00E00
regulation of adaptive immune response (GO	0002819) 171 2 .56 + 3.60 1.08E-01 1.00E00
protein-containing complex localization (GO	0031503) 257 3 .84 + 3.59 5.24E-02 1.00E00
transport across blood-brain barrier (GO	0150104) 86 1 .28 + 3.57 2.47E-01 1.00E00
cell growth (GO	0016049) 86 1 .28 + 3.57 2.47E-01 1.00E00
regulation of T cell proliferation (GO	0042129) 172 2 .56 + 3.57 1.09E-01 1.00E00
nucleocytoplasmic transport (GO	0006913) 259 3 .84 + 3.56 5.34E-02 1.00E00
vascular transport (GO	0010232) 87 1 .28 + 3.53 2.49E-01 1.00E00
regulation of interleukin-1 beta production (GO	0032651) 87 1 .28 + 3.53 2.49E-01 1.00E00
regulation of chemokine production (GO	0032642) 87 1 .28 + 3.53 2.49E-01 1.00E00
regulation of neurotransmitter receptor activity (GO	0099601) 87 1 .28 + 3.53 2.49E-01 1.00E00
regulation of DNA-templated transcription, initiation (GO	2000142) 87 1 .28 + 3.53 2.49E-01 1.00E00
organelle membrane fusion (GO	0090174) 87 1 .28 + 3.53 2.49E-01 1.00E00
anaphase-promoting complex-dependent catabolic process (GO	0031145) 87 1 .28 + 3.53 2.49E-01 1.00E00
regulation of cytokine production involved in immune response (GO	0002718) 87 1 .28 + 3.53 2.49E-01 1.00E00
nuclear transport (GO	0051169) 262 3 .85 + 3.52 5.49E-02 1.00E00
limb development (GO	0060173) 175 2 .57 + 3.51 1.13E-01 1.00E00
cellular response to interleukin-1 (GO	0071347) 175 2 .57 + 3.51 1.13E-01 1.00E00
appendage development (GO	0048736) 175 2 .57 + 3.51 1.13E-01 1.00E00
regulation of lymphocyte differentiation (GO	0045619) 176 2 .57 + 3.49 1.14E-01 1.00E00
roof of mouth development (GO	0060021) 88 1 .29 + 3.49 2.52E-01 1.00E00
regulation of intracellular pH (GO	0051453) 88 1 .29 + 3.49 2.52E-01 1.00E00
lipid oxidation (GO	0034440) 88 1 .29 + 3.49 2.52E-01 1.00E00
neural crest cell differentiation (GO	0014033) 89 1 .29 + 3.45 2.54E-01 1.00E00
regulation of sodium ion transport (GO	0002028) 89 1 .29 + 3.45 2.54E-01 1.00E00
meiotic chromosome segregation (GO	0045132) 89 1 .29 + 3.45 2.54E-01 1.00E00
epithelial cell proliferation (GO	0050673) 89 1 .29 + 3.45 2.54E-01 1.00E00
regulation of hematopoietic progenitor cell differentiation (GO	1901532) 90 1 .29 + 3.42 2.56E-01 1.00E00
retrograde transport, endosome to Golgi (GO	0042147) 90 1 .29 + 3.42 2.56E-01 1.00E00
activation of cysteine-type endopeptidase activity involved in apoptotic process (GO	0006919) 91 1 .30 + 3.38 2.59E-01 1.00E00
negative regulation of leukocyte proliferation (GO	0070664) 91 1 .30 + 3.38 2.59E-01 1.00E00
sulfur compound biosynthetic process (GO	0044272) 182 2 .59 + 3.38 1.20E-01 1.00E00
negative regulation of canonical Wnt signaling pathway (GO	0090090) 182 2 .59 + 3.38 1.20E-01 1.00E00
hair cycle (GO	0042633) 91 1 .30 + 3.38 2.59E-01 1.00E00
striated muscle cell development (GO	0055002) 91 1 .30 + 3.38 2.59E-01 1.00E00
molting cycle (GO	0042303) 91 1 .30 + 3.38 2.59E-01 1.00E00
extrinsic apoptotic signaling pathway (GO	0097191) 91 1 .30 + 3.38 2.59E-01 1.00E00
regulation of synaptic plasticity (GO	0048167) 183 2 .60 + 3.36 1.21E-01 1.00E00
vesicle targeting (GO	0006903) 92 1 .30 + 3.34 2.61E-01 1.00E00
cellular component assembly involved in morphogenesis (GO	0010927) 92 1 .30 + 3.34 2.61E-01 1.00E00
fertilization (GO	0009566) 186 2 .61 + 3.31 1.24E-01 1.00E00
regulation of biomineral tissue development (GO	0070167) 93 1 .30 + 3.31 2.64E-01 1.00E00
SCF-dependent proteasomal ubiquitin-dependent protein catabolic process (GO	0031146) 93 1 .30 + 3.31 2.64E-01 1.00E00
phospholipid transport (GO	0015914) 93 1 .30 + 3.31 2.64E-01 1.00E00
regulation of reactive oxygen species biosynthetic process (GO	1903426) 93 1 .30 + 3.31 2.64E-01 1.00E00
positive regulation of cell-cell adhesion (GO	0022409) 281 3 .91 + 3.28 6.48E-02 1.00E00
leukocyte proliferation (GO	0070661) 94 1 .31 + 3.27 2.66E-01 1.00E00
regulation of protein tyrosine kinase activity (GO	0061097) 94 1 .31 + 3.27 2.66E-01 1.00E00
regulation of cellular ketone metabolic process (GO	0010565) 189 2 .61 + 3.25 1.28E-01 1.00E00
regulation of biomineralization (GO	0110149) 95 1 .31 + 3.24 2.68E-01 1.00E00
cellular response to hypoxia (GO	0071456) 190 2 .62 + 3.24 1.29E-01 1.00E00
regulation of cellular pH (GO	0030641) 95 1 .31 + 3.24 2.68E-01 1.00E00
cardiac conduction (GO	0061337) 95 1 .31 + 3.24 2.68E-01 1.00E00
inner ear development (GO	0048839) 191 2 .62 + 3.22 1.30E-01 1.00E00
protein import into nucleus (GO	0006606) 96 1 .31 + 3.20 2.71E-01 1.00E00
interleukin-1-mediated signaling pathway (GO	0070498) 96 1 .31 + 3.20 2.71E-01 1.00E00
regulation of mRNA stability (GO	0043488) 192 2 .62 + 3.20 1.31E-01 1.00E00
endothelium development (GO	0003158) 96 1 .31 + 3.20 2.71E-01 1.00E00
respiratory system development (GO	0060541) 192 2 .62 + 3.20 1.31E-01 1.00E00
epithelial cell development (GO	0002064) 193 2 .63 + 3.19 1.32E-01 1.00E00
regulation of neuron differentiation (GO	0045664) 194 2 .63 + 3.17 1.33E-01 1.00E00
nephron epithelium development (GO	0072009) 97 1 .32 + 3.17 2.73E-01 1.00E00
maintenance of protein location (GO	0045185) 97 1 .32 + 3.17 2.73E-01 1.00E00
positive regulation of epithelial cell proliferation (GO	0050679) 194 2 .63 + 3.17 1.33E-01 1.00E00
negative regulation of G2/M transition of mitotic cell cycle (GO	0010972) 97 1 .32 + 3.17 2.73E-01 1.00E00
hormone metabolic process (GO	0042445) 194 2 .63 + 3.17 1.33E-01 1.00E00
regulation of signaling receptor activity (GO	0010469) 194 2 .63 + 3.17 1.33E-01 1.00E00
endoplasmic reticulum to Golgi vesicle-mediated transport (GO	0006888) 196 2 .64 + 3.14 1.35E-01 1.00E00
plasma membrane organization (GO	0007009) 98 1 .32 + 3.14 2.76E-01 1.00E00
regulation of NIK/NF-kappaB signaling (GO	1901222) 98 1 .32 + 3.14 2.76E-01 1.00E00
inner ear morphogenesis (GO	0042472) 98 1 .32 + 3.14 2.76E-01 1.00E00
negative regulation of lipid metabolic process (GO	0045833) 98 1 .32 + 3.14 2.76E-01 1.00E00
bone morphogenesis (GO	0060349) 99 1 .32 + 3.10 2.78E-01 1.00E00
regulation of fatty acid metabolic process (GO	0019217) 99 1 .32 + 3.10 2.78E-01 1.00E00
gland morphogenesis (GO	0022612) 99 1 .32 + 3.10 2.78E-01 1.00E00
response to ketone (GO	1901654) 199 2 .65 + 3.09 1.38E-01 1.00E00
cellular response to decreased oxygen levels (GO	0036294) 199 2 .65 + 3.09 1.38E-01 1.00E00
antigen processing and presentation of peptide antigen via MHC class I (GO	0002474) 100 1 .33 + 3.07 2.80E-01 1.00E00
defense response to Gram-positive bacterium (GO	0050830) 100 1 .33 + 3.07 2.80E-01 1.00E00
negative regulation of small molecule metabolic process (GO	0062014) 100 1 .33 + 3.07 2.80E-01 1.00E00
DNA packaging (GO	0006323) 201 2 .65 + 3.06 1.41E-01 1.00E00
response to interleukin-1 (GO	0070555) 201 2 .65 + 3.06 1.41E-01 1.00E00
RNA transport (GO	0050658) 201 2 .65 + 3.06 1.41E-01 1.00E00
nucleic acid transport (GO	0050657) 201 2 .65 + 3.06 1.41E-01 1.00E00
double-strand break repair via homologous recombination (GO	0000724) 101 1 .33 + 3.04 2.83E-01 1.00E00
regulation of RNA stability (GO	0043487) 202 2 .66 + 3.04 1.42E-01 1.00E00
regulation of pattern recognition receptor signaling pathway (GO	0062207) 101 1 .33 + 3.04 2.83E-01 1.00E00
positive regulation of T cell proliferation (GO	0042102) 101 1 .33 + 3.04 2.83E-01 1.00E00
establishment of RNA localization (GO	0051236) 203 2 .66 + 3.03 1.43E-01 1.00E00
cellular response to BMP stimulus (GO	0071773) 102 1 .33 + 3.01 2.85E-01 1.00E00
response to BMP (GO	0071772) 102 1 .33 + 3.01 2.85E-01 1.00E00
regulation of interleukin-1 production (GO	0032652) 102 1 .33 + 3.01 2.85E-01 1.00E00
negative regulation of leukocyte differentiation (GO	1902106) 102 1 .33 + 3.01 2.85E-01 1.00E00
vesicle budding from membrane (GO	0006900) 103 1 .34 + 2.98 2.87E-01 1.00E00
regulation of pH (GO	0006885) 103 1 .34 + 2.98 2.87E-01 1.00E00
recombinational repair (GO	0000725) 103 1 .34 + 2.98 2.87E-01 1.00E00
actomyosin structure organization (GO	0031032) 104 1 .34 + 2.96 2.90E-01 1.00E00
negative regulation of hemopoiesis (GO	1903707) 104 1 .34 + 2.96 2.90E-01 1.00E00
negative regulation of extrinsic apoptotic signaling pathway (GO	2001237) 105 1 .34 + 2.93 2.92E-01 1.00E00
receptor metabolic process (GO	0043112) 105 1 .34 + 2.93 2.92E-01 1.00E00
myelination (GO	0042552) 106 1 .34 + 2.90 2.94E-01 1.00E00
regulation of leukocyte mediated immunity (GO	0002703) 212 2 .69 + 2.90 1.53E-01 1.00E00
organelle fusion (GO	0048284) 107 1 .35 + 2.87 2.97E-01 1.00E00
negative regulation of Wnt signaling pathway (GO	0030178) 214 2 .70 + 2.87 1.55E-01 1.00E00
regulation of mRNA catabolic process (GO	0061013) 214 2 .70 + 2.87 1.55E-01 1.00E00
negative regulation of cell cycle G2/M phase transition (GO	1902750) 108 1 .35 + 2.85 2.99E-01 1.00E00
ensheathment of neurons (GO	0007272) 108 1 .35 + 2.85 2.99E-01 1.00E00
cellular response to oxygen levels (GO	0071453) 216 2 .70 + 2.85 1.57E-01 1.00E00
cellular detoxification (GO	1990748) 108 1 .35 + 2.85 2.99E-01 1.00E00
regulation of interferon-gamma production (GO	0032649) 108 1 .35 + 2.85 2.99E-01 1.00E00
response to retinoic acid (GO	0032526) 108 1 .35 + 2.85 2.99E-01 1.00E00
ear development (GO	0043583) 216 2 .70 + 2.85 1.57E-01 1.00E00
axon ensheathment (GO	0008366) 108 1 .35 + 2.85 2.99E-01 1.00E00
positive regulation of lymphocyte mediated immunity (GO	0002708) 108 1 .35 + 2.85 2.99E-01 1.00E00
regulation of leukocyte cell-cell adhesion (GO	1903037) 324 3 1.05 + 2.85 9.00E-02 1.00E00
neuropeptide signaling pathway (GO	0007218) 109 1 .35 + 2.82 3.01E-01 1.00E00
regulation of anion transmembrane transport (GO	1903959) 109 1 .35 + 2.82 3.01E-01 1.00E00
positive regulation of mitotic cell cycle (GO	0045931) 109 1 .35 + 2.82 3.01E-01 1.00E00
positive regulation of innate immune response (GO	0045089) 221 2 .72 + 2.78 1.63E-01 1.00E00
regulation of T cell activation (GO	0050863) 332 3 1.08 + 2.78 9.50E-02 1.00E00
RNA localization (GO	0006403) 222 2 .72 + 2.77 1.64E-01 1.00E00
protein targeting to ER (GO	0045047) 111 1 .36 + 2.77 3.06E-01 1.00E00
mitochondrial translation (GO	0032543) 111 1 .36 + 2.77 3.06E-01 1.00E00
negative regulation of cellular response to growth factor stimulus (GO	0090288) 111 1 .36 + 2.77 3.06E-01 1.00E00
gliogenesis (GO	0042063) 222 2 .72 + 2.77 1.64E-01 1.00E00
glial cell development (GO	0021782) 112 1 .36 + 2.74 3.08E-01 1.00E00
regulation of transcription from RNA polymerase II promoter in response to stress (GO	0043618) 112 1 .36 + 2.74 3.08E-01 1.00E00
regulation of lymphocyte proliferation (GO	0050670) 226 2 .74 + 2.72 1.69E-01 1.00E00
regulation of cell killing (GO	0031341) 113 1 .37 + 2.72 3.10E-01 1.00E00
developmental growth involved in morphogenesis (GO	0060560) 113 1 .37 + 2.72 3.10E-01 1.00E00
regulation of mononuclear cell proliferation (GO	0032944) 228 2 .74 + 2.70 1.71E-01 1.00E00
digestion (GO	0007586) 114 1 .37 + 2.70 3.12E-01 1.00E00
import into nucleus (GO	0051170) 115 1 .37 + 2.67 3.15E-01 1.00E00
regulation of ossification (GO	0030278) 115 1 .37 + 2.67 3.15E-01 1.00E00
cellular response to toxic substance (GO	0097237) 115 1 .37 + 2.67 3.15E-01 1.00E00
establishment of protein localization to endoplasmic reticulum (GO	0072599) 115 1 .37 + 2.67 3.15E-01 1.00E00
activation of GTPase activity (GO	0090630) 116 1 .38 + 2.65 3.17E-01 1.00E00
negative regulation of cellular protein localization (GO	1903828) 116 1 .38 + 2.65 3.17E-01 1.00E00
B cell differentiation (GO	0030183) 116 1 .38 + 2.65 3.17E-01 1.00E00
cellular monovalent inorganic cation homeostasis (GO	0030004) 116 1 .38 + 2.65 3.17E-01 1.00E00
nucleosome assembly (GO	0006334) 117 1 .38 + 2.63 3.19E-01 1.00E00
ear morphogenesis (GO	0042471) 117 1 .38 + 2.63 3.19E-01 1.00E00
muscle cell differentiation (GO	0042692) 235 2 .76 + 2.62 1.79E-01 1.00E00
Notch signaling pathway (GO	0007219) 118 1 .38 + 2.60 3.21E-01 1.00E00
negative regulation of T cell activation (GO	0050868) 118 1 .38 + 2.60 3.21E-01 1.00E00
regulation of DNA-templated transcription in response to stress (GO	0043620) 118 1 .38 + 2.60 3.21E-01 1.00E00
embryonic limb morphogenesis (GO	0030326) 118 1 .38 + 2.60 3.21E-01 1.00E00
embryonic appendage morphogenesis (GO	0035113) 118 1 .38 + 2.60 3.21E-01 1.00E00
cell fate commitment (GO	0045165) 237 2 .77 + 2.59 1.82E-01 1.00E00
negative regulation of ion transmembrane transport (GO	0034766) 119 1 .39 + 2.58 3.24E-01 1.00E00
regulation of osteoblast differentiation (GO	0045667) 120 1 .39 + 2.56 3.26E-01 1.00E00
negative regulation of transmembrane transport (GO	0034763) 120 1 .39 + 2.56 3.26E-01 1.00E00
cell recognition (GO	0008037) 240 2 .78 + 2.56 1.85E-01 1.00E00
mitotic sister chromatid segregation (GO	0000070) 121 1 .39 + 2.54 3.28E-01 1.00E00
regulation of myeloid leukocyte differentiation (GO	0002761) 121 1 .39 + 2.54 3.28E-01 1.00E00
skeletal muscle tissue development (GO	0007519) 121 1 .39 + 2.54 3.28E-01 1.00E00
vitamin metabolic process (GO	0006766) 122 1 .40 + 2.52 3.30E-01 1.00E00
regulation of leukocyte proliferation (GO	0070663) 245 2 .80 + 2.51 1.91E-01 1.00E00
embryonic epithelial tube formation (GO	0001838) 123 1 .40 + 2.50 3.32E-01 1.00E00
camera-type eye morphogenesis (GO	0048593) 123 1 .40 + 2.50 3.32E-01 1.00E00
endocrine system development (GO	0035270) 123 1 .40 + 2.50 3.32E-01 1.00E00
nephron development (GO	0072006) 124 1 .40 + 2.48 3.35E-01 1.00E00
cellular response to tumor necrosis factor (GO	0071356) 248 2 .81 + 2.48 1.95E-01 1.00E00
regulation of cellular response to transforming growth factor beta stimulus (GO	1903844) 124 1 .40 + 2.48 3.35E-01 1.00E00
kidney epithelium development (GO	0072073) 125 1 .41 + 2.46 3.37E-01 1.00E00
lymphocyte mediated immunity (GO	0002449) 254 2 .83 + 2.42 2.02E-01 1.00E00
protein-DNA complex assembly (GO	0065004) 254 2 .83 + 2.42 2.02E-01 1.00E00
positive regulation of leukocyte mediated immunity (GO	0002705) 127 1 .41 + 2.42 3.41E-01 1.00E00
positive regulation of lymphocyte activation (GO	0051251) 381 3 1.24 + 2.42 1.29E-01 1.00E00
branching morphogenesis of an epithelial tube (GO	0048754) 128 1 .42 + 2.40 3.43E-01 1.00E00
negative regulation of leukocyte cell-cell adhesion (GO	1903038) 129 1 .42 + 2.38 3.45E-01 1.00E00
mammary gland development (GO	0030879) 129 1 .42 + 2.38 3.45E-01 1.00E00
positive regulation of response to biotic stimulus (GO	0002833) 259 2 .84 + 2.37 2.07E-01 1.00E00
positive regulation of synaptic transmission (GO	0050806) 130 1 .42 + 2.36 3.47E-01 1.00E00
positive regulation of protein localization to membrane (GO	1905477) 130 1 .42 + 2.36 3.47E-01 1.00E00
phagocytosis, engulfment (GO	0006911) 131 1 .43 + 2.35 3.50E-01 1.00E00
epithelial tube formation (GO	0072175) 131 1 .43 + 2.35 3.50E-01 1.00E00
negative regulation of epithelial cell proliferation (GO	0050680) 131 1 .43 + 2.35 3.50E-01 1.00E00
skeletal muscle organ development (GO	0060538) 131 1 .43 + 2.35 3.50E-01 1.00E00
organophosphate ester transport (GO	0015748) 132 1 .43 + 2.33 3.52E-01 1.00E00
detoxification (GO	0098754) 133 1 .43 + 2.31 3.54E-01 1.00E00
male gonad development (GO	0008584) 133 1 .43 + 2.31 3.54E-01 1.00E00
cellular response to reactive oxygen species (GO	0034614) 133 1 .43 + 2.31 3.54E-01 1.00E00
regulation of interleukin-6 production (GO	0032675) 134 1 .44 + 2.29 3.56E-01 1.00E00
regulation of ion transmembrane transporter activity (GO	0032412) 268 2 .87 + 2.29 2.18E-01 1.00E00
import across plasma membrane (GO	0098739) 134 1 .44 + 2.29 3.56E-01 1.00E00
multicellular organismal signaling (GO	0035637) 134 1 .44 + 2.29 3.56E-01 1.00E00
development of primary male sexual characteristics (GO	0046546) 134 1 .44 + 2.29 3.56E-01 1.00E00
positive regulation of DNA-binding transcription factor activity (GO	0051091) 270 2 .88 + 2.28 2.21E-01 1.00E00
liver development (GO	0001889) 136 1 .44 + 2.26 3.60E-01 1.00E00
small molecule catabolic process (GO	0044282) 409 3 1.33 + 2.25 1.49E-01 1.00E00
MAPK cascade (GO	0000165) 409 3 1.33 + 2.25 1.49E-01 1.00E00
negative regulation of translation (GO	0017148) 137 1 .45 + 2.24 3.62E-01 1.00E00
regulation of protein localization to nucleus (GO	1900180) 137 1 .45 + 2.24 3.62E-01 1.00E00
response to organophosphorus (GO	0046683) 137 1 .45 + 2.24 3.62E-01 1.00E00
vacuole organization (GO	0007033) 138 1 .45 + 2.23 3.64E-01 1.00E00
response to estradiol (GO	0032355) 138 1 .45 + 2.23 3.64E-01 1.00E00
positive regulation of lymphocyte proliferation (GO	0050671) 138 1 .45 + 2.23 3.64E-01 1.00E00
negative regulation of protein-containing complex assembly (GO	0031333) 138 1 .45 + 2.23 3.64E-01 1.00E00
positive regulation of cysteine-type endopeptidase activity involved in apoptotic process (GO	0043280) 138 1 .45 + 2.23 3.64E-01 1.00E00
response to tumor necrosis factor (GO	0034612) 276 2 .90 + 2.23 2.28E-01 1.00E00
apoptotic signaling pathway (GO	0097190) 276 2 .90 + 2.23 2.28E-01 1.00E00
hepaticobiliary system development (GO	0061008) 138 1 .45 + 2.23 3.64E-01 1.00E00
positive regulation of mononuclear cell proliferation (GO	0032946) 139 1 .45 + 2.21 3.66E-01 1.00E00
muscle cell development (GO	0055001) 139 1 .45 + 2.21 3.66E-01 1.00E00
kidney development (GO	0001822) 279 2 .91 + 2.20 2.31E-01 1.00E00
regulation of transmembrane transporter activity (GO	0022898) 279 2 .91 + 2.20 2.31E-01 1.00E00
mitochondrial gene expression (GO	0140053) 140 1 .46 + 2.20 3.68E-01 1.00E00
plasma membrane invagination (GO	0099024) 140 1 .46 + 2.20 3.68E-01 1.00E00
muscle tissue development (GO	0060537) 280 2 .91 + 2.20 2.33E-01 1.00E00
regulation of response to biotic stimulus (GO	0002831) 421 3 1.37 + 2.19 1.59E-01 1.00E00
response to steroid hormone (GO	0048545) 281 2 .91 + 2.19 2.34E-01 1.00E00
regulation of leukocyte differentiation (GO	1902105) 282 2 .92 + 2.18 2.35E-01 1.00E00
modulation of chemical synaptic transmission (GO	0050804) 424 3 1.38 + 2.17 1.61E-01 1.00E00
regulation of trans-synaptic signaling (GO	0099177) 425 3 1.38 + 2.17 1.62E-01 1.00E00
positive regulation of leukocyte activation (GO	0002696) 425 3 1.38 + 2.17 1.62E-01 1.00E00
protein localization to endoplasmic reticulum (GO	0070972) 142 1 .46 + 2.16 3.73E-01 1.00E00
negative regulation of cytokine production (GO	0001818) 285 2 .93 + 2.16 2.39E-01 1.00E00
mitotic cell cycle phase transition (GO	0044772) 285 2 .93 + 2.16 2.39E-01 1.00E00
chromosome segregation (GO	0007059) 286 2 .93 + 2.15 2.40E-01 1.00E00
translational initiation (GO	0006413) 143 1 .47 + 2.15 3.75E-01 1.00E00
renal system development (GO	0072001) 288 2 .94 + 2.13 2.42E-01 1.00E00
morphogenesis of embryonic epithelium (GO	0016331) 144 1 .47 + 2.13 3.77E-01 1.00E00
regulation of canonical Wnt signaling pathway (GO	0060828) 288 2 .94 + 2.13 2.42E-01 1.00E00
regulation of cell-cell adhesion (GO	0022407) 434 3 1.41 + 2.12 1.69E-01 1.00E00
positive regulation of cell adhesion (GO	0045785) 435 3 1.42 + 2.12 1.70E-01 1.00E00
regulation of epithelial cell differentiation (GO	0030856) 145 1 .47 + 2.12 3.79E-01 1.00E00
T cell differentiation (GO	0030217) 145 1 .47 + 2.12 3.79E-01 1.00E00
positive regulation of cell activation (GO	0050867) 436 3 1.42 + 2.12 1.70E-01 1.00E00
negative regulation of immune system process (GO	0002683) 582 4 1.89 + 2.11 1.22E-01 1.00E00
regulation of transporter activity (GO	0032409) 292 2 .95 + 2.11 2.47E-01 1.00E00
cell cycle phase transition (GO	0044770) 293 2 .95 + 2.10 2.48E-01 1.00E00
protein-DNA complex subunit organization (GO	0071824) 294 2 .96 + 2.09 2.49E-01 1.00E00
peptidyl-tyrosine phosphorylation (GO	0018108) 147 1 .48 + 2.09 3.83E-01 1.00E00
positive regulation of canonical Wnt signaling pathway (GO	0090263) 147 1 .48 + 2.09 3.83E-01 1.00E00
tube formation (GO	0035148) 147 1 .48 + 2.09 3.83E-01 1.00E00
membrane invagination (GO	0010324) 147 1 .48 + 2.09 3.83E-01 1.00E00
cytosolic transport (GO	0016482) 148 1 .48 + 2.08 3.85E-01 1.00E00
monovalent inorganic cation homeostasis (GO	0055067) 148 1 .48 + 2.08 3.85E-01 1.00E00
sister chromatid segregation (GO	0000819) 149 1 .48 + 2.06 3.87E-01 1.00E00
chromatin assembly (GO	0031497) 149 1 .48 + 2.06 3.87E-01 1.00E00
membrane fusion (GO	0061025) 149 1 .48 + 2.06 3.87E-01 1.00E00
retina development in camera-type eye (GO	0060041) 150 1 .49 + 2.05 3.89E-01 1.00E00
peptidyl-tyrosine modification (GO	0018212) 150 1 .49 + 2.05 3.89E-01 1.00E00
positive regulation of leukocyte proliferation (GO	0070665) 150 1 .49 + 2.05 3.89E-01 1.00E00
eye morphogenesis (GO	0048592) 150 1 .49 + 2.05 3.89E-01 1.00E00
glycoprotein biosynthetic process (GO	0009101) 300 2 .98 + 2.05 2.57E-01 1.00E00
positive regulation of epithelial cell migration (GO	0010634) 150 1 .49 + 2.05 3.89E-01 1.00E00
regulation of production of molecular mediator of immune response (GO	0002700) 150 1 .49 + 2.05 3.89E-01 1.00E00
negative regulation of transcription by RNA polymerase II (GO	0000122) 902 6 2.93 + 2.04 7.36E-02 1.00E00
meiotic nuclear division (GO	0140013) 151 1 .49 + 2.04 3.91E-01 1.00E00
cellular response to transforming growth factor beta stimulus (GO	0071560) 152 1 .49 + 2.02 3.93E-01 1.00E00
response to purine-containing compound (GO	0014074) 152 1 .49 + 2.02 3.93E-01 1.00E00
negative regulation of lymphocyte activation (GO	0051250) 152 1 .49 + 2.02 3.93E-01 1.00E00
sensory perception of sound (GO	0007605) 152 1 .49 + 2.02 3.93E-01 1.00E00
autophagy (GO	0006914) 306 2 1.00 + 2.01 2.64E-01 1.00E00
process utilizing autophagic mechanism (GO	0061919) 306 2 1.00 + 2.01 2.64E-01 1.00E00
negative regulation of ion transport (GO	0043271) 307 2 1.00 + 2.00 2.65E-01 1.00E00
positive regulation of cysteine-type endopeptidase activity (GO	2001056) 154 1 .50 + 2.00 3.97E-01 1.00E00
stem cell differentiation (GO	0048863) 154 1 .50 + 2.00 3.97E-01 1.00E00
cartilage development (GO	0051216) 154 1 .50 + 2.00 3.97E-01 1.00E00
male sex differentiation (GO	0046661) 154 1 .50 + 2.00 3.97E-01 1.00E00
gastrulation (GO	0007369) 155 1 .50 + 1.98 3.99E-01 1.00E00
vesicle organization (GO	0016050) 310 2 1.01 + 1.98 2.69E-01 1.00E00
regulation of extrinsic apoptotic signaling pathway (GO	2001236) 156 1 .51 + 1.97 4.01E-01 1.00E00
regulation of innate immune response (GO	0045088) 312 2 1.02 + 1.97 2.71E-01 1.00E00
mesenchymal cell differentiation (GO	0048762) 156 1 .51 + 1.97 4.01E-01 1.00E00
protein import (GO	0017038) 156 1 .51 + 1.97 4.01E-01 1.00E00
transport along microtubule (GO	0010970) 156 1 .51 + 1.97 4.01E-01 1.00E00
nucleosome organization (GO	0034728) 156 1 .51 + 1.97 4.01E-01 1.00E00
antimicrobial humoral response (GO	0019730) 156 1 .51 + 1.97 4.01E-01 1.00E00
morphogenesis of a branching epithelium (GO	0061138) 156 1 .51 + 1.97 4.01E-01 1.00E00
DNA conformation change (GO	0071103) 313 2 1.02 + 1.96 2.72E-01 1.00E00
anaphase (GO	0051322) 157 1 .51 + 1.96 4.03E-01 1.00E00
mitotic anaphase (GO	0000090) 157 1 .51 + 1.96 4.03E-01 1.00E00
regulation of immune effector process (GO	0002697) 473 3 1.54 + 1.95 2.01E-01 1.00E00
potassium ion transmembrane transport (GO	0071805) 158 1 .51 + 1.95 4.05E-01 1.00E00
cellular response to interferon-gamma (GO	0071346) 158 1 .51 + 1.95 4.05E-01 1.00E00
response to transforming growth factor beta (GO	0071559) 159 1 .52 + 1.93 4.06E-01 1.00E00
negative regulation of cellular amide metabolic process (GO	0034249) 159 1 .52 + 1.93 4.06E-01 1.00E00
cellular response to lipid (GO	0071396) 478 3 1.56 + 1.93 2.05E-01 1.00E00
urogenital system development (GO	0001655) 320 2 1.04 + 1.92 2.81E-01 1.00E00
M phase (GO	0000279) 160 1 .52 + 1.92 4.08E-01 1.00E00
mitotic M phase (GO	0000087) 160 1 .52 + 1.92 4.08E-01 1.00E00
regeneration (GO	0031099) 161 1 .52 + 1.91 4.10E-01 1.00E00
organic hydroxy compound metabolic process (GO	1901615) 484 3 1.57 + 1.91 2.10E-01 1.00E00
maintenance of location (GO	0051235) 163 1 .53 + 1.89 4.14E-01 1.00E00
regulation of GTPase activity (GO	0043087) 490 3 1.59 + 1.88 2.15E-01 1.00E00
regulation of small GTPase mediated signal transduction (GO	0051056) 327 2 1.06 + 1.88 2.89E-01 1.00E00
immune response-regulating cell surface receptor signaling pathway (GO	0002768) 491 3 1.60 + 1.88 2.16E-01 1.00E00
regulation of cytokine-mediated signaling pathway (GO	0001959) 164 1 .53 + 1.87 4.16E-01 1.00E00
mitotic spindle organization (GO	0007052) 164 1 .53 + 1.87 4.16E-01 1.00E00
immune response-regulating signaling pathway (GO	0002764) 494 3 1.61 + 1.87 2.18E-01 1.00E00
meiotic cell cycle process (GO	1903046) 165 1 .54 + 1.86 4.18E-01 1.00E00
morphogenesis of a branching structure (GO	0001763) 165 1 .54 + 1.86 4.18E-01 1.00E00
alcohol metabolic process (GO	0006066) 332 2 1.08 + 1.85 2.95E-01 1.00E00
homophilic cell adhesion via plasma membrane adhesion molecules (GO	0007156) 167 1 .54 + 1.84 4.22E-01 1.00E00
mitotic prometaphase (GO	0000236) 167 1 .54 + 1.84 4.22E-01 1.00E00
cellular response to cytokine stimulus (GO	0071345) 1007 6 3.28 + 1.83 1.44E-01 1.00E00
potassium ion transport (GO	0006813) 168 1 .55 + 1.83 4.24E-01 1.00E00
chromatin assembly or disassembly (GO	0006333) 169 1 .55 + 1.82 4.26E-01 1.00E00
negative regulation of MAPK cascade (GO	0043409) 169 1 .55 + 1.82 4.26E-01 1.00E00
response to nutrient (GO	0007584) 169 1 .55 + 1.82 4.26E-01 1.00E00
electron transport chain (GO	0022900) 170 1 .55 + 1.81 4.27E-01 1.00E00
regulation of mRNA metabolic process (GO	1903311) 340 2 1.11 + 1.81 3.05E-01 1.00E00
cytokine-mediated signaling pathway (GO	0019221) 682 4 2.22 + 1.80 2.86E-01 1.00E00
negative regulation of immune response (GO	0050777) 341 2 1.11 + 1.80 3.06E-01 1.00E00
regulation of epithelial cell proliferation (GO	0050678) 342 2 1.11 + 1.80 3.07E-01 1.00E00
mitotic cell cycle process (GO	1903047) 685 4 2.23 + 1.79 2.87E-01 1.00E00
response to hypoxia (GO	0001666) 344 2 1.12 + 1.79 3.09E-01 1.00E00
chromatin remodeling (GO	0006338) 172 1 .56 + 1.79 4.31E-01 1.00E00
nucleobase-containing small molecule metabolic process (GO	0055086) 516 3 1.68 + 1.79 2.37E-01 1.00E00
defense response to bacterium (GO	0042742) 345 2 1.12 + 1.78 3.11E-01 1.00E00
cellular response to insulin stimulus (GO	0032869) 173 1 .56 + 1.78 4.33E-01 1.00E00
Fc-epsilon receptor signaling pathway (GO	0038095) 173 1 .56 + 1.78 4.33E-01 1.00E00
sensory perception of mechanical stimulus (GO	0050954) 173 1 .56 + 1.78 4.33E-01 1.00E00
negative regulation of developmental process (GO	0051093) 870 5 2.83 + 1.77 2.09E-01 1.00E00
cell-cell signaling by wnt (GO	0198738) 349 2 1.14 + 1.76 3.15E-01 1.00E00
Wnt signaling pathway (GO	0016055) 349 2 1.14 + 1.76 3.15E-01 1.00E00
positive regulation of cell projection organization (GO	0031346) 350 2 1.14 + 1.76 3.17E-01 1.00E00
protein processing (GO	0016485) 175 1 .57 + 1.76 4.37E-01 1.00E00
regulation of response to cytokine stimulus (GO	0060759) 175 1 .57 + 1.76 4.37E-01 1.00E00
developmental growth (GO	0048589) 354 2 1.15 + 1.74 3.21E-01 1.00E00
positive regulation of defense response (GO	0031349) 354 2 1.15 + 1.74 3.21E-01 1.00E00
regulation of lymphocyte activation (GO	0051249) 532 3 1.73 + 1.73 2.51E-01 1.00E00
antigen processing and presentation of exogenous peptide antigen (GO	0002478) 178 1 .58 + 1.73 4.42E-01 1.00E00
growth (GO	0040007) 357 2 1.16 + 1.72 3.25E-01 1.00E00
peptide metabolic process (GO	0006518) 537 3 1.75 + 1.72 2.55E-01 1.00E00
response to decreased oxygen levels (GO	0036293) 358 2 1.16 + 1.72 3.26E-01 1.00E00
negative regulation of leukocyte activation (GO	0002695) 179 1 .58 + 1.72 4.44E-01 1.00E00
T cell receptor signaling pathway (GO	0050852) 180 1 .59 + 1.71 4.46E-01 1.00E00
positive regulation of endopeptidase activity (GO	0010950) 180 1 .59 + 1.71 4.46E-01 1.00E00
positive regulation of Wnt signaling pathway (GO	0030177) 180 1 .59 + 1.71 4.46E-01 1.00E00
organic substance transport (GO	0071702) 2170 12 7.06 + 1.70 6.88E-02 1.00E00
tRNA metabolic process (GO	0006399) 181 1 .59 + 1.70 4.48E-01 1.00E00
response to interferon-gamma (GO	0034341) 181 1 .59 + 1.70 4.48E-01 1.00E00
regulation of cell adhesion (GO	0030155) 726 4 2.36 + 1.69 3.01E-01 1.00E00
lipid transport (GO	0006869) 364 2 1.18 + 1.69 3.33E-01 1.00E00
transcription initiation from RNA polymerase II promoter (GO	0006367) 182 1 .59 + 1.69 4.50E-01 1.00E00
posttranscriptional regulation of gene expression (GO	0010608) 547 3 1.78 + 1.69 2.64E-01 1.00E00
response to cytokine (GO	0034097) 1097 6 3.57 + 1.68 1.72E-01 1.00E00
protein transport (GO	0015031) 1463 8 4.76 + 1.68 1.46E-01 1.00E00
import into cell (GO	0098657) 183 1 .60 + 1.68 4.51E-01 1.00E00
regulation of Wnt signaling pathway (GO	0030111) 366 2 1.19 + 1.68 3.36E-01 1.00E00
bone development (GO	0060348) 184 1 .60 + 1.67 4.53E-01 1.00E00
negative regulation of cell-cell adhesion (GO	0022408) 184 1 .60 + 1.67 4.53E-01 1.00E00
sulfur compound metabolic process (GO	0006790) 369 2 1.20 + 1.67 3.39E-01 1.00E00
regulation of cation channel activity (GO	2001257) 185 1 .60 + 1.66 4.55E-01 1.00E00
microtubule cytoskeleton organization involved in mitosis (GO	1902850) 185 1 .60 + 1.66 4.55E-01 1.00E00
regulation of reactive oxygen species metabolic process (GO	2000377) 186 1 .61 + 1.65 4.57E-01 1.00E00
positive regulation of intracellular protein transport (GO	0090316) 186 1 .61 + 1.65 4.57E-01 1.00E00
small molecule biosynthetic process (GO	0044283) 558 3 1.82 + 1.65 4.31E-01 1.00E00
glycoprotein metabolic process (GO	0009100) 372 2 1.21 + 1.65 3.43E-01 1.00E00
antigen processing and presentation of exogenous antigen (GO	0019884) 186 1 .61 + 1.65 4.57E-01 1.00E00
peptide transport (GO	0015833) 1492 8 4.85 + 1.65 1.51E-01 1.00E00
embryonic morphogenesis (GO	0048598) 561 3 1.83 + 1.64 4.32E-01 1.00E00
nucleobase-containing compound catabolic process (GO	0034655) 375 2 1.22 + 1.64 3.46E-01 1.00E00
striated muscle cell differentiation (GO	0051146) 190 1 .62 + 1.62 4.64E-01 1.00E00
mitotic cell cycle (GO	0000278) 761 4 2.48 + 1.62 3.15E-01 1.00E00
anion transport (GO	0006820) 2287 12 7.44 + 1.61 8.06E-02 1.00E00
amide transport (GO	0042886) 1526 8 4.96 + 1.61 1.58E-01 1.00E00
microtubule-based transport (GO	0099111) 191 1 .62 + 1.61 4.66E-01 1.00E00
response to oxygen levels (GO	0070482) 383 2 1.25 + 1.61 3.56E-01 1.00E00
skin development (GO	0043588) 383 2 1.25 + 1.61 3.56E-01 1.00E00
translation (GO	0006412) 384 2 1.25 + 1.60 3.57E-01 1.00E00
humoral immune response (GO	0006959) 386 2 1.26 + 1.59 3.59E-01 1.00E00
antigen processing and presentation of peptide antigen (GO	0048002) 193 1 .63 + 1.59 4.69E-01 1.00E00
cytoskeleton-dependent intracellular transport (GO	0030705) 193 1 .63 + 1.59 4.69E-01 1.00E00
DNA-dependent DNA replication (GO	0006261) 194 1 .63 + 1.58 4.71E-01 1.00E00
regulation of system process (GO	0044057) 583 3 1.90 + 1.58 4.41E-01 1.00E00
intracellular protein transport (GO	0006886) 973 5 3.17 + 1.58 2.49E-01 1.00E00
establishment of protein localization (GO	0045184) 1558 8 5.07 + 1.58 1.66E-01 1.00E00
lymphocyte activation (GO	0046649) 391 2 1.27 + 1.57 3.65E-01 1.00E00
protein stabilization (GO	0050821) 196 1 .64 + 1.57 4.74E-01 1.00E00
carbohydrate derivative catabolic process (GO	1901136) 196 1 .64 + 1.57 4.74E-01 1.00E00
regulation of hemopoiesis (GO	1903706) 393 2 1.28 + 1.56 3.67E-01 1.00E00
negative regulation of defense response (GO	0031348) 394 2 1.28 + 1.56 3.69E-01 1.00E00
positive regulation of peptidase activity (GO	0010952) 197 1 .64 + 1.56 4.76E-01 1.00E00
response to reactive oxygen species (GO	0000302) 198 1 .64 + 1.55 4.78E-01 1.00E00
Golgi vesicle transport (GO	0048193) 396 2 1.29 + 1.55 3.71E-01 1.00E00
regulation of Ras protein signal transduction (GO	0046578) 198 1 .64 + 1.55 4.78E-01 1.00E00
negative regulation of biosynthetic process (GO	0009890) 1588 8 5.17 + 1.55 2.44E-01 1.00E00
regulation of protein localization to membrane (GO	1905475) 199 1 .65 + 1.54 4.79E-01 1.00E00
lipid localization (GO	0010876) 398 2 1.29 + 1.54 3.73E-01 1.00E00
negative regulation of cell activation (GO	0050866) 200 1 .65 + 1.54 4.81E-01 1.00E00
nitrogen compound transport (GO	0071705) 1801 9 5.86 + 1.54 1.89E-01 1.00E00
establishment of vesicle localization (GO	0051650) 201 1 .65 + 1.53 4.83E-01 1.00E00
generation of precursor metabolites and energy (GO	0006091) 402 2 1.31 + 1.53 3.78E-01 1.00E00
carbohydrate derivative biosynthetic process (GO	1901137) 604 3 1.96 + 1.53 4.50E-01 1.00E00
double-strand break repair (GO	0006302) 202 1 .66 + 1.52 4.84E-01 1.00E00
negative regulation of anion transport (GO	1903792) 202 1 .66 + 1.52 4.84E-01 1.00E00
connective tissue development (GO	0061448) 202 1 .66 + 1.52 4.84E-01 1.00E00
defense response (GO	0006952) 1416 7 4.61 + 1.52 2.27E-01 1.00E00
regulation of G2/M transition of mitotic cell cycle (GO	0010389) 203 1 .66 + 1.51 4.86E-01 1.00E00
B cell mediated immunity (GO	0019724) 204 1 .66 + 1.51 4.88E-01 1.00E00
peptide biosynthetic process (GO	0043043) 409 2 1.33 + 1.50 3.86E-01 1.00E00
positive regulation of ERK1 and ERK2 cascade (GO	0070374) 205 1 .67 + 1.50 4.90E-01 1.00E00
regulation of leukocyte activation (GO	0002694) 616 3 2.00 + 1.50 4.55E-01 1.00E00
defense response to other organism (GO	0098542) 1032 5 3.36 + 1.49 3.89E-01 1.00E00
positive regulation of GTPase activity (GO	0043547) 413 2 1.34 + 1.49 3.91E-01 1.00E00
mitotic nuclear division (GO	0140014) 209 1 .68 + 1.47 4.96E-01 1.00E00
heterocycle catabolic process (GO	0046700) 418 2 1.36 + 1.47 3.96E-01 1.00E00
gonad development (GO	0008406) 209 1 .68 + 1.47 4.96E-01 1.00E00
cell surface receptor signaling pathway involved in cell-cell signaling (GO	1905114) 419 2 1.36 + 1.47 3.98E-01 1.00E00
positive regulation of immune system process (GO	0002684) 1053 5 3.43 + 1.46 3.94E-01 1.00E00
vesicle localization (GO	0051648) 211 1 .69 + 1.46 4.99E-01 1.00E00
regulation of endopeptidase activity (GO	0052548) 424 2 1.38 + 1.45 4.03E-01 1.00E00
defense response to symbiont (GO	0140546) 212 1 .69 + 1.45 5.01E-01 1.00E00
defense response to virus (GO	0051607) 212 1 .69 + 1.45 5.01E-01 1.00E00
cellular nitrogen compound catabolic process (GO	0044270) 424 2 1.38 + 1.45 4.03E-01 1.00E00
regulation of cysteine-type endopeptidase activity involved in apoptotic process (GO	0043281) 212 1 .69 + 1.45 5.01E-01 1.00E00
negative regulation of cellular macromolecule biosynthetic process (GO	2000113) 1487 7 4.84 + 1.45 3.37E-01 1.00E00
macromolecule localization (GO	0033036) 2550 12 8.30 + 1.45 1.90E-01 1.00E00
negative regulation of cell differentiation (GO	0045596) 638 3 2.08 + 1.45 4.66E-01 1.00E00
negative regulation of transport (GO	0051051) 427 2 1.39 + 1.44 4.07E-01 1.00E00
negative regulation of macromolecule biosynthetic process (GO	0010558) 1498 7 4.87 + 1.44 3.39E-01 1.00E00
intracellular transport (GO	0046907) 1499 7 4.88 + 1.44 3.39E-01 1.00E00
negative regulation of transcription, DNA-templated (GO	0045892) 1288 6 4.19 + 1.43 3.13E-01 1.00E00
negative regulation of nucleic acid-templated transcription (GO	1903507) 1290 6 4.20 + 1.43 3.14E-01 1.00E00
morphogenesis of an epithelium (GO	0002009) 430 2 1.40 + 1.43 6.52E-01 1.00E00
development of primary sexual characteristics (GO	0045137) 215 1 .70 + 1.43 5.06E-01 1.00E00
homeostasis of number of cells (GO	0048872) 215 1 .70 + 1.43 5.06E-01 1.00E00
negative regulation of RNA biosynthetic process (GO	1902679) 1292 6 4.20 + 1.43 3.15E-01 1.00E00
protein localization (GO	0008104) 2158 10 7.02 + 1.42 2.30E-01 1.00E00
response to mechanical stimulus (GO	0009612) 216 1 .70 + 1.42 5.08E-01 1.00E00
visual perception (GO	0007601) 216 1 .70 + 1.42 5.08E-01 1.00E00
regulation of DNA-binding transcription factor activity (GO	0051090) 433 2 1.41 + 1.42 6.53E-01 1.00E00
mesenchyme development (GO	0060485) 218 1 .71 + 1.41 5.11E-01 1.00E00
second-messenger-mediated signaling (GO	0019932) 218 1 .71 + 1.41 5.11E-01 1.00E00
regulation of small molecule metabolic process (GO	0062012) 437 2 1.42 + 1.41 6.55E-01 1.00E00
regulation of cell cycle G2/M phase transition (GO	1902749) 219 1 .71 + 1.40 5.12E-01 1.00E00
regulation of neuron projection development (GO	0010975) 438 2 1.42 + 1.40 6.55E-01 1.00E00
regulation of cell activation (GO	0050865) 658 3 2.14 + 1.40 4.76E-01 1.00E00
aromatic compound catabolic process (GO	0019439) 440 2 1.43 + 1.40 6.56E-01 1.00E00
cellular response to inorganic substance (GO	0071241) 220 1 .72 + 1.40 5.14E-01 1.00E00
sensory perception of light stimulus (GO	0050953) 220 1 .72 + 1.40 5.14E-01 1.00E00
nucleoside phosphate metabolic process (GO	0006753) 441 2 1.43 + 1.39 6.56E-01 1.00E00
positive regulation of immune effector process (GO	0002699) 221 1 .72 + 1.39 5.16E-01 1.00E00
response to organic cyclic compound (GO	0014070) 886 4 2.88 + 1.39 5.36E-01 1.00E00
ion transport (GO	0006811) 2881 13 9.37 + 1.39 2.15E-01 1.00E00
wound healing (GO	0042060) 444 2 1.44 + 1.38 6.57E-01 1.00E00
negative regulation of cellular biosynthetic process (GO	0031327) 1556 7 5.06 + 1.38 3.51E-01 1.00E00
antigen processing and presentation (GO	0019882) 223 1 .73 + 1.38 5.19E-01 1.00E00
DNA-templated transcription, initiation (GO	0006352) 224 1 .73 + 1.37 5.20E-01 1.00E00
DNA recombination (GO	0006310) 224 1 .73 + 1.37 5.20E-01 1.00E00
skeletal system morphogenesis (GO	0048705) 224 1 .73 + 1.37 5.20E-01 1.00E00
establishment of protein localization to organelle (GO	0072594) 449 2 1.46 + 1.37 6.59E-01 1.00E00
negative regulation of mitotic cell cycle phase transition (GO	1901991) 225 1 .73 + 1.37 5.22E-01 1.00E00
spindle organization (GO	0007051) 225 1 .73 + 1.37 5.22E-01 1.00E00
regulation of peptidase activity (GO	0052547) 452 2 1.47 + 1.36 6.60E-01 1.00E00
meiotic cell cycle (GO	0051321) 226 1 .74 + 1.36 5.24E-01 1.00E00
immune response-activating cell surface receptor signaling pathway (GO	0002429) 454 2 1.48 + 1.35 6.61E-01 1.00E00
negative regulation of apoptotic signaling pathway (GO	2001234) 227 1 .74 + 1.35 5.25E-01 1.00E00
positive regulation of intracellular transport (GO	0032388) 227 1 .74 + 1.35 5.25E-01 1.00E00
nuclear chromosome segregation (GO	0098813) 227 1 .74 + 1.35 5.25E-01 1.00E00
immune response-activating signal transduction (GO	0002757) 454 2 1.48 + 1.35 6.61E-01 1.00E00
apoptotic process (GO	0006915) 912 4 2.97 + 1.35 5.42E-01 1.00E00
tissue homeostasis (GO	0001894) 228 1 .74 + 1.35 5.27E-01 1.00E00
muscle structure development (GO	0061061) 460 2 1.50 + 1.34 6.63E-01 1.00E00
regulation of epithelial cell migration (GO	0010632) 231 1 .75 + 1.33 5.31E-01 1.00E00
regulation of MAPK cascade (GO	0043408) 694 3 2.26 + 1.33 4.95E-01 1.00E00
small molecule metabolic process (GO	0044281) 1623 7 5.28 + 1.33 3.69E-01 1.00E00
negative regulation of RNA metabolic process (GO	0051253) 1394 6 4.53 + 1.32 4.60E-01 1.00E00
protein complex oligomerization (GO	0051259) 233 1 .76 + 1.32 5.34E-01 1.00E00
endosomal transport (GO	0016197) 233 1 .76 + 1.32 5.34E-01 1.00E00
organic cyclic compound catabolic process (GO	1901361) 468 2 1.52 + 1.31 6.66E-01 1.00E00
lipid modification (GO	0030258) 234 1 .76 + 1.31 5.36E-01 1.00E00
plasma membrane bounded cell projection assembly (GO	0120031) 469 2 1.53 + 1.31 6.66E-01 1.00E00
positive regulation of protein catabolic process (GO	0045732) 235 1 .76 + 1.31 5.37E-01 1.00E00
regulation of microtubule-based process (GO	0032886) 235 1 .76 + 1.31 5.37E-01 1.00E00
regulation of myeloid cell differentiation (GO	0045637) 236 1 .77 + 1.30 5.39E-01 1.00E00
heart morphogenesis (GO	0003007) 237 1 .77 + 1.30 5.40E-01 1.00E00
response to insulin (GO	0032868) 237 1 .77 + 1.30 5.40E-01 1.00E00
regulation of cysteine-type endopeptidase activity (GO	2000116) 237 1 .77 + 1.30 5.40E-01 1.00E00
cell adhesion (GO	0007155) 951 4 3.09 + 1.29 5.53E-01 1.00E00
Fc receptor signaling pathway (GO	0038093) 238 1 .77 + 1.29 5.42E-01 1.00E00
negative regulation of protein kinase activity (GO	0006469) 238 1 .77 + 1.29 5.42E-01 1.00E00
cell population proliferation (GO	0008283) 477 2 1.55 + 1.29 6.69E-01 1.00E00
regulation of heart contraction (GO	0008016) 239 1 .78 + 1.29 5.43E-01 1.00E00
membrane organization (GO	0061024) 956 4 3.11 + 1.29 5.54E-01 1.00E00
biological adhesion (GO	0022610) 957 4 3.11 + 1.28 5.54E-01 1.00E00
response to toxic substance (GO	0009636) 240 1 .78 + 1.28 5.45E-01 1.00E00
negative regulation of cell cycle phase transition (GO	1901988) 241 1 .78 + 1.28 5.46E-01 1.00E00
negative regulation of gene expression (GO	0010629) 964 4 3.14 + 1.28 5.57E-01 1.00E00
protein glycosylation (GO	0006486) 242 1 .79 + 1.27 5.48E-01 1.00E00
protein maturation (GO	0051604) 242 1 .79 + 1.27 5.48E-01 1.00E00
macromolecule glycosylation (GO	0043413) 242 1 .79 + 1.27 5.48E-01 1.00E00
T cell activation (GO	0042110) 242 1 .79 + 1.27 5.48E-01 1.00E00
macromolecule biosynthetic process (GO	0009059) 1696 7 5.52 + 1.27 5.01E-01 1.00E00
cell projection assembly (GO	0030031) 485 2 1.58 + 1.27 6.73E-01 1.00E00
regulation of immune system process (GO	0002682) 1701 7 5.53 + 1.26 5.01E-01 1.00E00
vascular process in circulatory system (GO	0003018) 245 1 .80 + 1.25 5.52E-01 1.00E00
negative regulation of endopeptidase activity (GO	0010951) 245 1 .80 + 1.25 5.52E-01 1.00E00
cellular response to oxidative stress (GO	0034599) 245 1 .80 + 1.25 5.52E-01 1.00E00
negative regulation of intracellular signal transduction (GO	1902532) 492 2 1.60 + 1.25 6.75E-01 1.00E00
cell division (GO	0051301) 492 2 1.60 + 1.25 6.75E-01 1.00E00
immune response (GO	0006955) 1972 8 6.42 + 1.25 5.29E-01 1.00E00
regulation of calcium ion transport (GO	0051924) 247 1 .80 + 1.24 5.55E-01 1.00E00
receptor-mediated endocytosis (GO	0006898) 248 1 .81 + 1.24 5.57E-01 1.00E00
lymphocyte differentiation (GO	0030098) 248 1 .81 + 1.24 5.57E-01 1.00E00
carboxylic acid transport (GO	0046942) 249 1 .81 + 1.23 5.58E-01 1.00E00
Unclassified (UNCLASSIFIED) 2745 11 8.93 + 1.23 4.70E-01 1.00E00
cellular response to organic cyclic compound (GO	0071407) 500 2 1.63 + 1.23 6.79E-01 1.00E00
nucleobase-containing compound biosynthetic process (GO	0034654) 1003 4 3.26 + 1.23 5.69E-01 1.00E00
cellular response to growth factor stimulus (GO	0071363) 503 2 1.64 + 1.22 6.80E-01 1.00E00
positive regulation of response to external stimulus (GO	0032103) 503 2 1.64 + 1.22 6.80E-01 1.00E00
carbohydrate derivative metabolic process (GO	1901135) 1006 4 3.27 + 1.22 5.70E-01 1.00E00
leukocyte mediated immunity (GO	0002443) 755 3 2.46 + 1.22 7.38E-01 1.00E00
negative regulation of nucleobase-containing compound metabolic process (GO	0045934) 1514 6 4.93 + 1.22 6.35E-01 1.00E00
regulation of intracellular signal transduction (GO	1902531) 1768 7 5.75 + 1.22 5.14E-01 1.00E00
negative regulation of cellular catabolic process (GO	0031330) 253 1 .82 + 1.21 5.64E-01 1.00E00
positive regulation of intracellular signal transduction (GO	1902533) 1015 4 3.30 + 1.21 5.73E-01 1.00E00
glycosylation (GO	0070085) 255 1 .83 + 1.21 5.67E-01 1.00E00
negative regulation of peptidase activity (GO	0010466) 255 1 .83 + 1.21 5.67E-01 1.00E00
negative regulation of signal transduction (GO	0009968) 1276 5 4.15 + 1.20 6.09E-01 1.00E00
regulation of catabolic process (GO	0009894) 1021 4 3.32 + 1.20 5.75E-01 1.00E00
biological phase (GO	0044848) 257 1 .84 + 1.20 5.70E-01 1.00E00
mitotic cell cycle phase (GO	0098763) 257 1 .84 + 1.20 5.70E-01 1.00E00
cell-cell adhesion (GO	0098609) 514 2 1.67 + 1.20 6.85E-01 1.00E00
regulation of metal ion transport (GO	0010959) 257 1 .84 + 1.20 5.70E-01 1.00E00
cell cycle phase (GO	0022403) 257 1 .84 + 1.20 5.70E-01 1.00E00
negative regulation of response to stimulus (GO	0048585) 1804 7 5.87 + 1.19 6.62E-01 1.00E00
sensory organ morphogenesis (GO	0090596) 258 1 .84 + 1.19 5.71E-01 1.00E00
regulation of intracellular protein transport (GO	0033157) 258 1 .84 + 1.19 5.71E-01 1.00E00
positive regulation of signal transduction (GO	0009967) 1551 6 5.05 + 1.19 6.40E-01 1.00E00
immune system process (GO	0002376) 2849 11 9.27 + 1.19 4.82E-01 1.00E00
cell-cell adhesion via plasma-membrane adhesion molecules (GO	0098742) 259 1 .84 + 1.19 5.73E-01 1.00E00
regulation of peptidyl-tyrosine phosphorylation (GO	0050730) 259 1 .84 + 1.19 5.73E-01 1.00E00
positive regulation of cell migration (GO	0030335) 518 2 1.69 + 1.19 6.86E-01 1.00E00
positive regulation of hydrolase activity (GO	0051345) 777 3 2.53 + 1.19 7.41E-01 1.00E00
transmembrane receptor protein tyrosine kinase signaling pathway (GO	0007169) 519 2 1.69 + 1.18 6.87E-01 1.00E00
positive regulation of MAPK cascade (GO	0043410) 520 2 1.69 + 1.18 6.87E-01 1.00E00
negative regulation of kinase activity (GO	0033673) 261 1 .85 + 1.18 5.75E-01 1.00E00
programmed cell death (GO	0012501) 1044 4 3.40 + 1.18 5.83E-01 1.00E00
cellular response to hormone stimulus (GO	0032870) 523 2 1.70 + 1.18 6.88E-01 1.00E00
regulation of hydrolase activity (GO	0051336) 1308 5 4.26 + 1.18 6.16E-01 1.00E00
ossification (GO	0001503) 262 1 .85 + 1.17 5.77E-01 1.00E00
steroid metabolic process (GO	0008202) 262 1 .85 + 1.17 5.77E-01 1.00E00
cellular nitrogen compound biosynthetic process (GO	0044271) 1575 6 5.12 + 1.17 6.43E-01 1.00E00
protein localization to organelle (GO	0033365) 791 3 2.57 + 1.17 7.44E-01 1.00E00
amide biosynthetic process (GO	0043604) 528 2 1.72 + 1.16 6.91E-01 1.00E00
sex differentiation (GO	0007548) 264 1 .86 + 1.16 5.79E-01 1.00E00
activation of immune response (GO	0002253) 529 2 1.72 + 1.16 6.91E-01 1.00E00
cellular response to oxygen-containing compound (GO	1901701) 1058 4 3.44 + 1.16 7.78E-01 1.00E00
biological process involved in interspecies interaction between organisms (GO	0044419) 2118 8 6.89 + 1.16 6.85E-01 1.00E00
striated muscle tissue development (GO	0014706) 265 1 .86 + 1.16 5.81E-01 1.00E00
adaptive immune response based on somatic recombination of immune receptors built from immunoglobulin superfamily domains (GO	0002460) 266 1 .87 + 1.16 5.82E-01 1.00E00
response to growth factor (GO	0070848) 532 2 1.73 + 1.16 6.92E-01 1.00E00
tissue morphogenesis (GO	0048729) 532 2 1.73 + 1.16 6.92E-01 1.00E00
regulation of hormone levels (GO	0010817) 532 2 1.73 + 1.16 6.92E-01 1.00E00
protein-containing complex assembly (GO	0065003) 1337 5 4.35 + 1.15 6.23E-01 1.00E00
cell cycle process (GO	0022402) 1070 4 3.48 + 1.15 7.79E-01 1.00E00
heterocycle biosynthetic process (GO	0018130) 1076 4 3.50 + 1.14 7.79E-01 1.00E00
rhythmic process (GO	0048511) 269 1 .88 + 1.14 5.86E-01 1.00E00
cellular amide metabolic process (GO	0043603) 808 3 2.63 + 1.14 7.47E-01 1.00E00
cell death (GO	0008219) 1079 4 3.51 + 1.14 7.80E-01 1.00E00
cell activation (GO	0001775) 1084 4 3.53 + 1.13 7.80E-01 1.00E00
DNA replication (GO	0006260) 271 1 .88 + 1.13 5.89E-01 1.00E00
aromatic compound biosynthetic process (GO	0019438) 1086 4 3.53 + 1.13 7.81E-01 1.00E00
positive regulation of cell motility (GO	2000147) 543 2 1.77 + 1.13 6.97E-01 1.00E00
response to wounding (GO	0009611) 543 2 1.77 + 1.13 6.97E-01 1.00E00
response to organic substance (GO	0010033) 2995 11 9.74 + 1.13 6.05E-01 1.00E00
cellular protein localization (GO	0034613) 1639 6 5.33 + 1.13 6.54E-01 1.00E00
immune effector process (GO	0002252) 1095 4 3.56 + 1.12 7.82E-01 1.00E00
response to lipid (GO	0033993) 822 3 2.67 + 1.12 7.50E-01 1.00E00
cellular response to peptide hormone stimulus (GO	0071375) 274 1 .89 + 1.12 5.93E-01 1.00E00
cellular macromolecule localization (GO	0070727) 1645 6 5.35 + 1.12 6.55E-01 1.00E00
negative regulation of cell communication (GO	0010648) 1373 5 4.47 + 1.12 8.04E-01 1.00E00
negative regulation of response to external stimulus (GO	0032102) 550 2 1.79 + 1.12 7.00E-01 1.00E00
negative regulation of signaling (GO	0023057) 1376 5 4.48 + 1.12 8.04E-01 1.00E00
positive regulation of cell differentiation (GO	0045597) 827 3 2.69 + 1.12 7.51E-01 1.00E00
cellular macromolecule biosynthetic process (GO	0034645) 1655 6 5.38 + 1.11 6.57E-01 1.00E00
organonitrogen compound biosynthetic process (GO	1901566) 1380 5 4.49 + 1.11 8.04E-01 1.00E00
carboxylic acid metabolic process (GO	0019752) 828 3 2.69 + 1.11 7.52E-01 1.00E00
sensory organ development (GO	0007423) 555 2 1.81 + 1.11 7.02E-01 1.00E00
positive regulation of cellular component movement (GO	0051272) 556 2 1.81 + 1.11 7.03E-01 1.00E00
protein deubiquitination (GO	0016579) 278 1 .90 + 1.11 5.98E-01 1.00E00
carboxylic acid biosynthetic process (GO	0046394) 278 1 .90 + 1.11 5.98E-01 1.00E00
regulation of cellular localization (GO	0060341) 836 3 2.72 + 1.10 7.53E-01 1.00E00
cellular amino acid metabolic process (GO	0006520) 279 1 .91 + 1.10 6.00E-01 1.00E00
positive regulation of locomotion (GO	0040017) 558 2 1.82 + 1.10 7.04E-01 1.00E00
regulation of defense response (GO	0031347) 838 3 2.73 + 1.10 7.54E-01 1.00E00
innate immune response (GO	0045087) 840 3 2.73 + 1.10 7.54E-01 1.00E00
muscle organ development (GO	0007517) 280 1 .91 + 1.10 6.01E-01 1.00E00
tube development (GO	0035295) 841 3 2.74 + 1.10 7.55E-01 1.00E00
sexual reproduction (GO	0019953) 842 3 2.74 + 1.10 7.55E-01 1.00E00
endocytosis (GO	0006897) 562 2 1.83 + 1.09 7.06E-01 1.00E00
negative regulation of cell adhesion (GO	0007162) 281 1 .91 + 1.09 6.02E-01 1.00E00
cell-cell signaling (GO	0007267) 1125 4 3.66 + 1.09 7.85E-01 1.00E00
negative regulation of cell motility (GO	2000146) 282 1 .92 + 1.09 6.04E-01 1.00E00
regulation of cellular protein localization (GO	1903827) 564 2 1.83 + 1.09 7.06E-01 1.00E00
viral process (GO	0016032) 849 3 2.76 + 1.09 7.56E-01 1.00E00
response to other organism (GO	0051707) 1418 5 4.61 + 1.08 8.07E-01 1.00E00
response to external biotic stimulus (GO	0043207) 1420 5 4.62 + 1.08 8.08E-01 1.00E00
regulation of cellular catabolic process (GO	0031329) 855 3 2.78 + 1.08 7.58E-01 1.00E00
organic acid biosynthetic process (GO	0016053) 285 1 .93 + 1.08 6.08E-01 1.00E00
regulation of blood circulation (GO	1903522) 285 1 .93 + 1.08 6.08E-01 1.00E00
positive regulation of cell communication (GO	0010647) 1714 6 5.58 + 1.08 8.23E-01 1.00E00
cellular protein-containing complex assembly (GO	0034622) 859 3 2.79 + 1.07 7.59E-01 1.00E00
negative regulation of cellular metabolic process (GO	0031324) 2580 9 8.39 + 1.07 8.53E-01 1.00E00
positive regulation of signaling (GO	0023056) 1720 6 5.60 + 1.07 8.24E-01 1.00E00
mononuclear cell differentiation (GO	1903131) 287 1 .93 + 1.07 6.10E-01 1.00E00
oxoacid metabolic process (GO	0043436) 861 3 2.80 + 1.07 7.59E-01 1.00E00
regulation of transcription by RNA polymerase II (GO	0006357) 2586 9 8.41 + 1.07 8.53E-01 1.00E00
cellular response to chemical stress (GO	0062197) 288 1 .94 + 1.07 6.11E-01 1.00E00
regulation of signaling (GO	0023051) 3459 12 11.25 + 1.07 7.45E-01 1.00E00
muscle system process (GO	0003012) 289 1 .94 + 1.06 6.13E-01 1.00E00
embryonic organ morphogenesis (GO	0048562) 290 1 .94 + 1.06 6.14E-01 1.00E00
negative regulation of cellular component movement (GO	0051271) 290 1 .94 + 1.06 6.14E-01 1.00E00
regulation of ion transmembrane transport (GO	0034765) 580 2 1.89 + 1.06 7.14E-01 1.00E00
response to abiotic stimulus (GO	0009628) 1162 4 3.78 + 1.06 7.91E-01 1.00E00
response to biotic stimulus (GO	0009607) 1455 5 4.73 + 1.06 8.11E-01 1.00E00
regulation of ERK1 and ERK2 cascade (GO	0070372) 291 1 .95 + 1.06 6.15E-01 1.00E00
cellular response to organic substance (GO	0071310) 2331 8 7.58 + 1.05 8.46E-01 1.00E00
regulation of cellular response to growth factor stimulus (GO	0090287) 292 1 .95 + 1.05 6.17E-01 1.00E00
regulation of transmembrane transport (GO	0034762) 585 2 1.90 + 1.05 7.16E-01 1.00E00
regulation of mitotic cell cycle (GO	0007346) 588 2 1.91 + 1.05 7.17E-01 1.00E00
negative regulation of mitotic cell cycle (GO	0045930) 294 1 .96 + 1.05 6.19E-01 1.00E00
protein modification by small protein removal (GO	0070646) 295 1 .96 + 1.04 6.20E-01 1.00E00
cellular response to organonitrogen compound (GO	0071417) 591 2 1.92 + 1.04 7.19E-01 1.00E00
establishment of localization in cell (GO	0051649) 2365 8 7.69 + 1.04 8.48E-01 1.00E00
organic acid metabolic process (GO	0006082) 894 3 2.91 + 1.03 7.67E-01 1.00E00
blood coagulation (GO	0007596) 298 1 .97 + 1.03 6.24E-01 1.00E00
negative regulation of nitrogen compound metabolic process (GO	0051172) 2390 8 7.78 + 1.03 8.49E-01 1.00E00
antigen receptor-mediated signaling pathway (GO	0050851) 299 1 .97 + 1.03 6.25E-01 1.00E00
cellular catabolic process (GO	0044248) 1797 6 5.85 + 1.03 8.30E-01 1.00E00
coagulation (GO	0050817) 300 1 .98 + 1.02 6.26E-01 1.00E00
transport (GO	0006810) 4501 15 14.64 + 1.02 8.83E-01 1.00E00
cellular biosynthetic process (GO	0044249) 2709 9 8.81 + 1.02 8.58E-01 1.00E00
negative regulation of transferase activity (GO	0051348) 301 1 .98 + 1.02 6.28E-01 1.00E00
positive regulation of cellular protein localization (GO	1903829) 301 1 .98 + 1.02 6.28E-01 1.00E00
regulation of cellular macromolecule biosynthetic process (GO	2000112) 3913 13 12.73 + 1.02 8.77E-01 1.00E00
hemostasis (GO	0007599) 302 1 .98 + 1.02 1.00E00 1.00E00
epithelial tube morphogenesis (GO	0060562) 302 1 .98 + 1.02 1.00E00 1.00E00
regulation of protein stability (GO	0031647) 303 1 .99 + 1.01 1.00E00 1.00E00
regulation of macromolecule biosynthetic process (GO	0010556) 3944 13 12.83 + 1.01 1.00E00 1.00E00
regulation of signal transduction (GO	0009966) 3047 10 9.91 + 1.01 1.00E00 1.00E00
cellular component assembly (GO	0022607) 2438 8 7.93 + 1.01 1.00E00 1.00E00
regulation of developmental process (GO	0050793) 2441 8 7.94 + 1.01 1.00E00 1.00E00
organic cyclic compound biosynthetic process (GO	1901362) 1222 4 3.98 + 1.01 1.00E00 1.00E00
response to virus (GO	0009615) 308 1 1.00 - 1.00 1.00E00 1.00E00
establishment of localization (GO	0051234) 4653 15 15.14 - .99 1.00E00 1.00E00
negative regulation of metabolic process (GO	0009892) 3104 10 10.10 - .99 1.00E00 1.00E00
regulation of plasma membrane bounded cell projection organization (GO	0120035) 621 2 2.02 - .99 1.00E00 1.00E00
positive regulation of cell population proliferation (GO	0008284) 932 3 3.03 - .99 1.00E00 1.00E00
cell surface receptor signaling pathway (GO	0007166) 2486 8 8.09 - .99 1.00E00 1.00E00
regulation of cell communication (GO	0010646) 3424 11 11.14 - .99 1.00E00 1.00E00
regulation of RNA metabolic process (GO	0051252) 3738 12 12.16 - .99 1.00E00 1.00E00
organic substance biosynthetic process (GO	1901576) 2804 9 9.12 - .99 1.00E00 1.00E00
leukocyte activation (GO	0045321) 935 3 3.04 - .99 1.00E00 1.00E00
biological process involved in symbiotic interaction (GO	0044403) 937 3 3.05 - .98 1.00E00 1.00E00
negative regulation of catabolic process (GO	0009895) 313 1 1.02 - .98 1.00E00 1.00E00
negative regulation of locomotion (GO	0040013) 314 1 1.02 - .98 1.00E00 1.00E00
purine ribonucleotide metabolic process (GO	0009150) 314 1 1.02 - .98 1.00E00 1.00E00
regulation of transcription, DNA-templated (GO	0006355) 3464 11 11.27 - .98 1.00E00 1.00E00
cellular response to abiotic stimulus (GO	0071214) 315 1 1.02 - .98 1.00E00 1.00E00
cellular response to environmental stimulus (GO	0104004) 315 1 1.02 - .98 1.00E00 1.00E00
regulation of nucleic acid-templated transcription (GO	1903506) 3465 11 11.27 - .98 1.00E00 1.00E00
regulation of cell differentiation (GO	0045595) 1576 5 5.13 - .98 1.00E00 1.00E00
regulation of RNA biosynthetic process (GO	2001141) 3470 11 11.29 - .97 1.00E00 1.00E00
regulation of cell motility (GO	2000145) 947 3 3.08 - .97 1.00E00 1.00E00
regulation of cellular biosynthetic process (GO	0031326) 4105 13 13.35 - .97 1.00E00 1.00E00
protein-containing complex subunit organization (GO	0043933) 1581 5 5.14 - .97 1.00E00 1.00E00
response to oxygen-containing compound (GO	1901700) 1584 5 5.15 - .97 1.00E00 1.00E00
biosynthetic process (GO	0009058) 2861 9 9.31 - .97 1.00E00 1.00E00
negative regulation of macromolecule metabolic process (GO	0010605) 2861 9 9.31 - .97 1.00E00 1.00E00
camera-type eye development (GO	0043010) 318 1 1.03 - .97 1.00E00 1.00E00
regulation of anatomical structure morphogenesis (GO	0022603) 955 3 3.11 - .97 1.00E00 1.00E00
biological_process (GO	0008150) 17850 56 58.07 - .96 4.70E-01 1.00E00
regulation of cell projection organization (GO	0031344) 638 2 2.08 - .96 1.00E00 1.00E00
protein polyubiquitination (GO	0000209) 322 1 1.05 - .95 1.00E00 1.00E00
cellular response to chemical stimulus (GO	0070887) 2898 9 9.43 - .95 1.00E00 1.00E00
regulation of biosynthetic process (GO	0009889) 4189 13 13.63 - .95 1.00E00 1.00E00
biological regulation (GO	0065007) 12571 39 40.90 - .95 7.07E-01 1.00E00
tube morphogenesis (GO	0035239) 645 2 2.10 - .95 1.00E00 1.00E00
signaling (GO	0023052) 5485 17 17.84 - .95 8.91E-01 1.00E00
proteasome-mediated ubiquitin-dependent protein catabolic process (GO	0043161) 323 1 1.05 - .95 1.00E00 1.00E00
transmembrane transport (GO	0055085) 1292 4 4.20 - .95 1.00E00 1.00E00
cell development (GO	0048468) 1615 5 5.25 - .95 1.00E00 1.00E00
embryo development (GO	0009790) 971 3 3.16 - .95 1.00E00 1.00E00
adaptive immune response (GO	0002250) 649 2 2.11 - .95 1.00E00 1.00E00
positive regulation of response to stimulus (GO	0048584) 2278 7 7.41 - .94 1.00E00 1.00E00
cellular response to nitrogen compound (GO	1901699) 651 2 2.12 - .94 1.00E00 1.00E00
phagocytosis (GO	0006909) 326 1 1.06 - .94 1.00E00 1.00E00
fatty acid metabolic process (GO	0006631) 327 1 1.06 - .94 1.00E00 1.00E00
cell communication (GO	0007154) 5572 17 18.13 - .94 8.90E-01 1.00E00
immune system development (GO	0002520) 656 2 2.13 - .94 1.00E00 1.00E00
negative regulation of cellular protein metabolic process (GO	0032269) 984 3 3.20 - .94 1.00E00 1.00E00
regulation of growth (GO	0040008) 657 2 2.14 - .94 1.00E00 1.00E00
positive regulation of protein transport (GO	0051222) 329 1 1.07 - .93 1.00E00 1.00E00
regulation of locomotion (GO	0040012) 990 3 3.22 - .93 1.00E00 1.00E00
central nervous system development (GO	0007417) 991 3 3.22 - .93 1.00E00 1.00E00
regulation of autophagy (GO	0010506) 331 1 1.08 - .93 1.00E00 1.00E00
ribonucleotide metabolic process (GO	0009259) 332 1 1.08 - .93 1.00E00 1.00E00
response to organonitrogen compound (GO	0010243) 997 3 3.24 - .92 1.00E00 1.00E00
negative regulation of cell death (GO	0060548) 998 3 3.25 - .92 1.00E00 1.00E00
multi-organism reproductive process (GO	0044703) 999 3 3.25 - .92 1.00E00 1.00E00
cellular localization (GO	0051641) 3003 9 9.77 - .92 1.00E00 1.00E00
regulation of nucleobase-containing compound metabolic process (GO	0019219) 4007 12 13.04 - .92 8.77E-01 1.00E00
cellular response to peptide (GO	1901653) 334 1 1.09 - .92 1.00E00 1.00E00
purine nucleotide metabolic process (GO	0006163) 334 1 1.09 - .92 1.00E00 1.00E00
negative regulation of multicellular organismal process (GO	0051241) 1002 3 3.26 - .92 1.00E00 1.00E00
regulation of ion transport (GO	0043269) 1337 4 4.35 - .92 1.00E00 1.00E00
negative regulation of cell cycle process (GO	0010948) 335 1 1.09 - .92 1.00E00 1.00E00
cellular process (GO	0009987) 15487 46 50.38 - .91 2.56E-01 1.00E00
epithelial cell differentiation (GO	0030855) 674 2 2.19 - .91 1.00E00 1.00E00
cellular component biogenesis (GO	0044085) 2701 8 8.79 - .91 1.00E00 1.00E00
regulation of biological process (GO	0050789) 11856 35 38.57 - .91 3.88E-01 1.00E00
nuclear division (GO	0000280) 340 1 1.11 - .90 1.00E00 1.00E00
organic anion transport (GO	0015711) 340 1 1.11 - .90 1.00E00 1.00E00
localization (GO	0051179) 5807 17 18.89 - .90 6.84E-01 1.00E00
regulation of cellular component movement (GO	0051270) 1026 3 3.34 - .90 1.00E00 1.00E00
cellular response to external stimulus (GO	0071496) 342 1 1.11 - .90 1.00E00 1.00E00
ribose phosphate metabolic process (GO	0019693) 342 1 1.11 - .90 1.00E00 1.00E00
signal transduction (GO	0007165) 5138 15 16.72 - .90 7.77E-01 1.00E00
negative regulation of proteolysis (GO	0045861) 344 1 1.12 - .89 1.00E00 1.00E00
negative regulation of cell population proliferation (GO	0008285) 689 2 2.24 - .89 1.00E00 1.00E00
positive regulation of establishment of protein localization (GO	1904951) 345 1 1.12 - .89 1.00E00 1.00E00
proteasomal protein catabolic process (GO	0010498) 345 1 1.12 - .89 1.00E00 1.00E00
negative regulation of biological process (GO	0048519) 5541 16 18.03 - .89 6.79E-01 1.00E00
regulation of apoptotic signaling pathway (GO	2001233) 347 1 1.13 - .89 1.00E00 1.00E00
catabolic process (GO	0009056) 2084 6 6.78 - .88 1.00E00 1.00E00
cell cycle (GO	0007049) 1390 4 4.52 - .88 1.00E00 1.00E00
regulation of gene expression (GO	0010468) 4872 14 15.85 - .88 6.68E-01 1.00E00
microtubule-based movement (GO	0007018) 350 1 1.14 - .88 1.00E00 1.00E00
negative regulation of cellular process (GO	0048523) 4909 14 15.97 - .88 6.67E-01 1.00E00
negative regulation of protein phosphorylation (GO	0001933) 351 1 1.14 - .88 1.00E00 1.00E00
negative regulation of protein metabolic process (GO	0051248) 1056 3 3.44 - .87 1.00E00 1.00E00
leukocyte differentiation (GO	0002521) 353 1 1.15 - .87 1.00E00 1.00E00
regulation of molecular function (GO	0065009) 3178 9 10.34 - .87 7.38E-01 1.00E00
regulation of response to stimulus (GO	0048583) 4240 12 13.79 - .87 6.53E-01 1.00E00
regulation of cytokine production (GO	0001817) 707 2 2.30 - .87 1.00E00 1.00E00
positive regulation of catalytic activity (GO	0043085) 1415 4 4.60 - .87 1.00E00 1.00E00
organic cyclic compound metabolic process (GO	1901360) 3190 9 10.38 - .87 7.37E-01 1.00E00
purine-containing compound metabolic process (GO	0072521) 355 1 1.15 - .87 1.00E00 1.00E00
multi-organism process (GO	0051704) 1067 3 3.47 - .86 1.00E00 1.00E00
anatomical structure morphogenesis (GO	0009653) 2135 6 6.95 - .86 8.42E-01 1.00E00
system development (GO	0048731) 4279 12 13.92 - .86 6.52E-01 1.00E00
reproductive process (GO	0022414) 1432 4 4.66 - .86 1.00E00 1.00E00
response to external stimulus (GO	0009605) 2508 7 8.16 - .86 8.51E-01 1.00E00
reproduction (GO	0000003) 1435 4 4.67 - .86 1.00E00 1.00E00
negative regulation of cellular component organization (GO	0051129) 718 2 2.34 - .86 1.00E00 1.00E00
response to bacterium (GO	0009617) 718 2 2.34 - .86 1.00E00 1.00E00
regulation of catalytic activity (GO	0050790) 2516 7 8.19 - .86 8.51E-01 1.00E00
multicellular organismal homeostasis (GO	0048871) 360 1 1.17 - .85 1.00E00 1.00E00
regulation of intracellular transport (GO	0032386) 361 1 1.17 - .85 1.00E00 1.00E00
post-translational protein modification (GO	0043687) 361 1 1.17 - .85 1.00E00 1.00E00
response to nitrogen compound (GO	1901698) 1085 3 3.53 - .85 1.00E00 1.00E00
enzyme linked receptor protein signaling pathway (GO	0007167) 726 2 2.36 - .85 1.00E00 1.00E00
heterocycle metabolic process (GO	0046483) 2904 8 9.45 - .85 7.27E-01 1.00E00
response to stress (GO	0006950) 3634 10 11.82 - .85 6.33E-01 1.00E00
response to chemical (GO	0042221) 4369 12 14.21 - .84 6.53E-01 1.00E00
regulation of biological quality (GO	0065008) 4007 11 13.04 - .84 6.43E-01 1.00E00
regulation of cellular process (GO	0050794) 11302 31 36.77 - .84 1.76E-01 1.00E00
nervous system development (GO	0007399) 2189 6 7.12 - .84 8.42E-01 1.00E00
epithelium development (GO	0060429) 1097 3 3.57 - .84 1.00E00 1.00E00
eye development (GO	0001654) 366 1 1.19 - .84 1.00E00 1.00E00
regulation of proteolysis (GO	0030162) 734 2 2.39 - .84 1.00E00 1.00E00
regulation of translation (GO	0006417) 368 1 1.20 - .84 1.00E00 1.00E00
protein targeting (GO	0006605) 369 1 1.20 - .83 1.00E00 1.00E00
positive regulation of immune response (GO	0050778) 738 2 2.40 - .83 1.00E00 1.00E00
organelle fission (GO	0048285) 370 1 1.20 - .83 1.00E00 1.00E00
visual system development (GO	0150063) 370 1 1.20 - .83 1.00E00 1.00E00
positive regulation of proteolysis (GO	0045862) 370 1 1.20 - .83 1.00E00 1.00E00
regulation of cation transmembrane transport (GO	1904062) 372 1 1.21 - .83 1.00E00 1.00E00
sensory system development (GO	0048880) 376 1 1.22 - .82 1.00E00 1.00E00
cellular response to stimulus (GO	0051716) 6770 18 22.02 - .82 3.62E-01 1.00E00
anatomical structure development (GO	0048856) 5266 14 17.13 - .82 4.83E-01 1.00E00
regulation of immune response (GO	0050776) 1129 3 3.67 - .82 1.00E00 1.00E00
anatomical structure homeostasis (GO	0060249) 377 1 1.23 - .82 1.00E00 1.00E00
cilium assembly (GO	0060271) 378 1 1.23 - .81 1.00E00 1.00E00
positive regulation of cellular component organization (GO	0051130) 1135 3 3.69 - .81 1.00E00 1.00E00
cellular nitrogen compound metabolic process (GO	0034641) 3407 9 11.08 - .81 6.21E-01 1.00E00
regulation of nitrogen compound metabolic process (GO	0051171) 5688 15 18.50 - .81 4.12E-01 1.00E00
developmental process (GO	0032502) 5729 15 18.64 - .80 4.12E-01 1.00E00
cellular response to endogenous stimulus (GO	0071495) 1146 3 3.73 - .80 1.00E00 1.00E00
extracellular matrix organization (GO	0030198) 382 1 1.24 - .80 1.00E00 1.00E00
extracellular structure organization (GO	0043062) 383 1 1.25 - .80 1.00E00 1.00E00
external encapsulating structure organization (GO	0045229) 385 1 1.25 - .80 1.00E00 1.00E00
regulation of cell cycle process (GO	0010564) 772 2 2.51 - .80 1.00E00 1.00E00
response to stimulus (GO	0050896) 8496 22 27.64 - .80 1.73E-01 1.00E00
regulation of response to stress (GO	0080134) 1546 4 5.03 - .80 8.17E-01 1.00E00
nucleobase-containing compound metabolic process (GO	0006139) 2719 7 8.85 - .79 5.92E-01 1.00E00
negative regulation of molecular function (GO	0044092) 1171 3 3.81 - .79 1.00E00 1.00E00
organelle assembly (GO	0070925) 781 2 2.54 - .79 1.00E00 1.00E00
DNA metabolic process (GO	0006259) 781 2 2.54 - .79 1.00E00 1.00E00
regulation of localization (GO	0032879) 2734 7 8.89 - .79 5.91E-01 1.00E00
positive regulation of cell cycle (GO	0045787) 391 1 1.27 - .79 1.00E00 1.00E00
vesicle-mediated transport (GO	0016192) 1958 5 6.37 - .78 8.33E-01 1.00E00
regulation of primary metabolic process (GO	0080090) 5892 15 19.17 - .78 2.82E-01 1.00E00
regulation of macromolecule metabolic process (GO	0060255) 6301 16 20.50 - .78 2.88E-01 1.00E00
regulation of response to external stimulus (GO	0032101) 1182 3 3.85 - .78 1.00E00 1.00E00
negative regulation of phosphorylation (GO	0042326) 395 1 1.29 - .78 1.00E00 1.00E00
response to oxidative stress (GO	0006979) 396 1 1.29 - .78 1.00E00 1.00E00
establishment of organelle localization (GO	0051656) 397 1 1.29 - .77 1.00E00 1.00E00
regulation of protein catabolic process (GO	0042176) 397 1 1.29 - .77 1.00E00 1.00E00
cellular metabolic process (GO	0044237) 7570 19 24.63 - .77 1.65E-01 1.00E00
regulation of cell cycle (GO	0051726) 1196 3 3.89 - .77 1.00E00 1.00E00
response to peptide hormone (GO	0043434) 400 1 1.30 - .77 1.00E00 1.00E00
cytoskeleton organization (GO	0007010) 1204 3 3.92 - .77 1.00E00 1.00E00
microtubule-based process (GO	0007017) 803 2 2.61 - .77 1.00E00 1.00E00
cilium organization (GO	0044782) 402 1 1.31 - .76 1.00E00 1.00E00
regulation of lipid metabolic process (GO	0019216) 403 1 1.31 - .76 1.00E00 1.00E00
response to hormone (GO	0009725) 807 2 2.63 - .76 1.00E00 1.00E00
positive regulation of cellular process (GO	0048522) 5656 14 18.40 - .76 2.73E-01 1.00E00
transcription by RNA polymerase II (GO	0006366) 406 1 1.32 - .76 1.00E00 1.00E00
blood vessel morphogenesis (GO	0048514) 406 1 1.32 - .76 1.00E00 1.00E00
regulation of cellular protein metabolic process (GO	0032268) 2437 6 7.93 - .76 5.72E-01 1.00E00
multicellular organism development (GO	0007275) 4877 12 15.87 - .76 3.15E-01 1.00E00
negative regulation of catalytic activity (GO	0043086) 814 2 2.65 - .76 1.00E00 1.00E00
regulation of cellular metabolic process (GO	0031323) 6106 15 19.86 - .76 2.28E-01 1.00E00
lipid metabolic process (GO	0006629) 1222 3 3.98 - .75 7.98E-01 1.00E00
system process (GO	0003008) 2040 5 6.64 - .75 6.81E-01 1.00E00
reproductive structure development (GO	0048608) 408 1 1.33 - .75 1.00E00 1.00E00
gland development (GO	0048732) 409 1 1.33 - .75 1.00E00 1.00E00
regulation of cell population proliferation (GO	0042127) 1640 4 5.34 - .75 8.19E-01 1.00E00
reproductive system development (GO	0061458) 411 1 1.34 - .75 1.00E00 1.00E00
cellular component organization (GO	0016043) 5775 14 18.79 - .75 2.21E-01 1.00E00
regulation of cell death (GO	0010941) 1652 4 5.37 - .74 8.20E-01 1.00E00
metabolic process (GO	0008152) 8333 20 27.11 - .74 8.17E-02 1.00E00
epidermis development (GO	0008544) 417 1 1.36 - .74 1.00E00 1.00E00
positive regulation of developmental process (GO	0051094) 1259 3 4.10 - .73 7.98E-01 1.00E00
cellular aromatic compound metabolic process (GO	0006725) 2948 7 9.59 - .73 4.84E-01 1.00E00
regulation of mitotic cell cycle phase transition (GO	1901990) 424 1 1.38 - .72 1.00E00 1.00E00
circulatory system development (GO	0072359) 853 2 2.77 - .72 1.00E00 1.00E00
embryonic organ development (GO	0048568) 427 1 1.39 - .72 1.00E00 1.00E00
regulation of metabolic process (GO	0019222) 6847 16 22.27 - .72 1.19E-01 1.00E00
cellular component organization or biogenesis (GO	0071840) 5999 14 19.52 - .72 1.77E-01 1.00E00
proteolysis (GO	0006508) 1289 3 4.19 - .72 7.99E-01 1.00E00
nucleotide metabolic process (GO	0009117) 431 1 1.40 - .71 1.00E00 1.00E00
regulation of cellular amide metabolic process (GO	0034248) 432 1 1.41 - .71 1.00E00 1.00E00
regulation of protein metabolic process (GO	0051246) 2595 6 8.44 - .71 4.62E-01 1.00E00
tissue development (GO	0009888) 1732 4 5.63 - .71 6.58E-01 1.00E00
anatomical structure formation involved in morphogenesis (GO	0048646) 870 2 2.83 - .71 1.00E00 1.00E00
regulation of membrane potential (GO	0042391) 436 1 1.42 - .71 1.00E00 1.00E00
gene expression (GO	0010467) 2186 5 7.11 - .70 5.50E-01 1.00E00
peptidyl-amino acid modification (GO	0018193) 875 2 2.85 - .70 1.00E00 1.00E00
organic substance metabolic process (GO	0071704) 7878 18 25.63 - .70 5.91E-02 1.00E00
cell differentiation (GO	0030154) 3509 8 11.42 - .70 3.29E-01 1.00E00
regulation of multicellular organismal development (GO	2000026) 1318 3 4.29 - .70 8.00E-01 1.00E00
regulation of transport (GO	0051049) 1758 4 5.72 - .70 6.59E-01 1.00E00
positive regulation of cytokine production (GO	0001819) 440 1 1.43 - .70 1.00E00 1.00E00
organic substance catabolic process (GO	1901575) 1761 4 5.73 - .70 6.59E-01 1.00E00
regulation of multicellular organismal process (GO	0051239) 2647 6 8.61 - .70 4.63E-01 1.00E00
positive regulation of molecular function (GO	0044093) 1766 4 5.75 - .70 6.60E-01 1.00E00
regulation of cell migration (GO	0030334) 885 2 2.88 - .69 1.00E00 1.00E00
G protein-coupled receptor signaling pathway (GO	0007186) 1329 3 4.32 - .69 8.01E-01 1.00E00
negative regulation of apoptotic process (GO	0043066) 888 2 2.89 - .69 1.00E00 1.00E00
cellular developmental process (GO	0048869) 3562 8 11.59 - .69 3.30E-01 1.00E00
positive regulation of biological process (GO	0048518) 6244 14 20.31 - .69 1.10E-01 1.00E00
organelle organization (GO	0006996) 3574 8 11.63 - .69 3.30E-01 1.00E00
organophosphate metabolic process (GO	0019637) 898 2 2.92 - .68 1.00E00 1.00E00
regulation of protein localization (GO	0032880) 899 2 2.92 - .68 1.00E00 1.00E00
cellular macromolecule metabolic process (GO	0044260) 4963 11 16.15 - .68 1.54E-01 1.00E00
negative regulation of programmed cell death (GO	0043069) 907 2 2.95 - .68 1.00E00 1.00E00
regulation of kinase activity (GO	0043549) 908 2 2.95 - .68 1.00E00 1.00E00
regulation of protein-containing complex assembly (GO	0043254) 454 1 1.48 - .68 1.00E00 1.00E00
negative regulation of hydrolase activity (GO	0051346) 455 1 1.48 - .68 1.00E00 1.00E00
neurogenesis (GO	0022008) 1369 3 4.45 - .67 6.27E-01 1.00E00
positive regulation of phosphorylation (GO	0042327) 913 2 2.97 - .67 7.70E-01 1.00E00
anion transmembrane transport (GO	0098656) 458 1 1.49 - .67 1.00E00 1.00E00
positive regulation of catabolic process (GO	0009896) 460 1 1.50 - .67 1.00E00 1.00E00
primary metabolic process (GO	0044238) 7363 16 23.95 - .67 5.45E-02 1.00E00
positive regulation of multicellular organismal process (GO	0051240) 1386 3 4.51 - .67 6.27E-01 1.00E00
regulation of cell cycle phase transition (GO	1901987) 462 1 1.50 - .67 1.00E00 1.00E00
regulation of phosphorylation (GO	0042325) 1400 3 4.55 - .66 6.27E-01 1.00E00
synaptic signaling (GO	0099536) 467 1 1.52 - .66 1.00E00 1.00E00
protein metabolic process (GO	0019538) 4218 9 13.72 - .66 1.74E-01 1.00E00
skeletal system development (GO	0001501) 471 1 1.53 - .65 1.00E00 1.00E00
response to endogenous stimulus (GO	0009719) 1416 3 4.61 - .65 6.28E-01 1.00E00
animal organ morphogenesis (GO	0009887) 945 2 3.07 - .65 7.71E-01 1.00E00
carbohydrate metabolic process (GO	0005975) 474 1 1.54 - .65 1.00E00 1.00E00
circulatory system process (GO	0003013) 476 1 1.55 - .65 1.00E00 1.00E00
macromolecule metabolic process (GO	0043170) 6193 13 20.15 - .65 6.16E-02 1.00E00
organonitrogen compound metabolic process (GO	1901564) 5251 11 17.08 - .64 9.31E-02 1.00E00
response to peptide (GO	1901652) 480 1 1.56 - .64 1.00E00 1.00E00
neutrophil degranulation (GO	0043312) 482 1 1.57 - .64 1.00E00 1.00E00
phosphorus metabolic process (GO	0006793) 1933 4 6.29 - .64 5.25E-01 1.00E00
neutrophil activation involved in immune response (GO	0002283) 486 1 1.58 - .63 1.00E00 1.00E00
sensory perception (GO	0007600) 973 2 3.17 - .63 7.71E-01 1.00E00
cellular lipid metabolic process (GO	0044255) 975 2 3.17 - .63 7.72E-01 1.00E00
endomembrane system organization (GO	0010256) 488 1 1.59 - .63 1.00E00 1.00E00
blood vessel development (GO	0001568) 489 1 1.59 - .63 1.00E00 1.00E00
nitrogen compound metabolic process (GO	0006807) 6897 14 22.44 - .62 2.78E-02 1.00E00
neutrophil mediated immunity (GO	0002446) 493 1 1.60 - .62 1.00E00 1.00E00
regulation of apoptotic process (GO	0042981) 1479 3 4.81 - .62 6.31E-01 1.00E00
multicellular organismal process (GO	0032501) 6909 14 22.48 - .62 2.77E-02 1.00E00
regulation of body fluid levels (GO	0050878) 494 1 1.61 - .62 1.00E00 1.00E00
positive regulation of phosphorus metabolic process (GO	0010562) 989 2 3.22 - .62 7.72E-01 1.00E00
positive regulation of phosphate metabolic process (GO	0045937) 989 2 3.22 - .62 7.72E-01 1.00E00
response to nutrient levels (GO	0031667) 495 1 1.61 - .62 1.00E00 1.00E00
neutrophil activation (GO	0042119) 495 1 1.61 - .62 1.00E00 1.00E00
granulocyte activation (GO	0036230) 499 1 1.62 - .62 1.00E00 1.00E00
positive regulation of anion transport (GO	1903793) 502 1 1.63 - .61 1.00E00 1.00E00
regulation of programmed cell death (GO	0043067) 1517 3 4.94 - .61 4.85E-01 1.00E00
leukocyte degranulation (GO	0043299) 506 1 1.65 - .61 1.00E00 1.00E00
heart development (GO	0007507) 508 1 1.65 - .61 1.00E00 1.00E00
vasculature development (GO	0001944) 512 1 1.67 - .60 1.00E00 1.00E00
regulation of transferase activity (GO	0051338) 1025 2 3.33 - .60 7.75E-01 1.00E00
negative regulation of phosphate metabolic process (GO	0045936) 513 1 1.67 - .60 1.00E00 1.00E00
monocarboxylic acid metabolic process (GO	0032787) 514 1 1.67 - .60 1.00E00 1.00E00
neuron differentiation (GO	0030182) 1028 2 3.34 - .60 7.75E-01 1.00E00
negative regulation of phosphorus metabolic process (GO	0010563) 514 1 1.67 - .60 1.00E00 1.00E00
myeloid leukocyte mediated immunity (GO	0002444) 515 1 1.68 - .60 1.00E00 1.00E00
ncRNA metabolic process (GO	0034660) 517 1 1.68 - .59 1.00E00 1.00E00
cellular protein metabolic process (GO	0044267) 3643 7 11.85 - .59 1.48E-01 1.00E00
myeloid cell activation involved in immune response (GO	0002275) 524 1 1.70 - .59 1.00E00 1.00E00
actin cytoskeleton organization (GO	0030036) 524 1 1.70 - .59 1.00E00 1.00E00
response to extracellular stimulus (GO	0009991) 525 1 1.71 - .59 1.00E00 1.00E00
intracellular signal transduction (GO	0035556) 1575 3 5.12 - .59 4.87E-01 1.00E00
ion transmembrane transport (GO	0034220) 1051 2 3.42 - .58 5.85E-01 1.00E00
positive regulation of cellular component biogenesis (GO	0044089) 527 1 1.71 - .58 1.00E00 1.00E00
DNA repair (GO	0006281) 530 1 1.72 - .58 1.00E00 1.00E00
chromosome organization (GO	0051276) 1061 2 3.45 - .58 5.85E-01 1.00E00
animal organ development (GO	0048513) 3187 6 10.37 - .58 1.75E-01 1.00E00
ubiquitin-dependent protein catabolic process (GO	0006511) 533 1 1.73 - .58 1.00E00 1.00E00
positive regulation of gene expression (GO	0010628) 1072 2 3.49 - .57 5.85E-01 1.00E00
regulation of phosphate metabolic process (GO	0019220) 1611 3 5.24 - .57 4.89E-01 1.00E00
regulation of phosphorus metabolic process (GO	0051174) 1611 3 5.24 - .57 4.89E-01 1.00E00
organonitrogen compound catabolic process (GO	1901565) 1080 2 3.51 - .57 5.85E-01 1.00E00
modification-dependent protein catabolic process (GO	0019941) 540 1 1.76 - .57 1.00E00 1.00E00
response to inorganic substance (GO	0010035) 542 1 1.76 - .57 1.00E00 1.00E00
regulation of protein modification process (GO	0031399) 1633 3 5.31 - .56 4.92E-01 1.00E00
spermatogenesis (GO	0007283) 548 1 1.78 - .56 1.00E00 1.00E00
behavior (GO	0007610) 548 1 1.78 - .56 1.00E00 1.00E00
negative regulation of protein modification process (GO	0031400) 549 1 1.79 - .56 1.00E00 1.00E00
positive regulation of apoptotic process (GO	0043065) 549 1 1.79 - .56 1.00E00 1.00E00
modification-dependent macromolecule catabolic process (GO	0043632) 551 1 1.79 - .56 1.00E00 1.00E00
transcription, DNA-templated (GO	0006351) 553 1 1.80 - .56 1.00E00 1.00E00
cell morphogenesis involved in differentiation (GO	0000904) 554 1 1.80 - .55 1.00E00 1.00E00
nucleic acid-templated transcription (GO	0097659) 554 1 1.80 - .55 1.00E00 1.00E00
nucleic acid metabolic process (GO	0090304) 2232 4 7.26 - .55 2.40E-01 1.00E00
positive regulation of programmed cell death (GO	0043068) 564 1 1.83 - .55 1.00E00 1.00E00
RNA biosynthetic process (GO	0032774) 566 1 1.84 - .54 1.00E00 1.00E00
microtubule cytoskeleton organization (GO	0000226) 566 1 1.84 - .54 1.00E00 1.00E00
regulation of protein transport (GO	0051223) 567 1 1.84 - .54 1.00E00 1.00E00
male gamete generation (GO	0048232) 567 1 1.84 - .54 1.00E00 1.00E00
negative regulation of cell cycle (GO	0045786) 569 1 1.85 - .54 1.00E00 1.00E00
inorganic cation transmembrane transport (GO	0098662) 572 1 1.86 - .54 1.00E00 1.00E00
hemopoiesis (GO	0030097) 572 1 1.86 - .54 1.00E00 1.00E00
plasma membrane bounded cell projection organization (GO	0120036) 1166 2 3.79 - .53 5.90E-01 1.00E00
myeloid leukocyte activation (GO	0002274) 587 1 1.91 - .52 1.00E00 1.00E00
regulation of establishment of protein localization (GO	0070201) 592 1 1.93 - .52 1.00E00 1.00E00
proteolysis involved in cellular protein catabolic process (GO	0051603) 596 1 1.94 - .52 1.00E00 1.00E00
supramolecular fiber organization (GO	0097435) 597 1 1.94 - .51 1.00E00 1.00E00
actin filament-based process (GO	0030029) 598 1 1.95 - .51 1.00E00 1.00E00
regulation of peptide transport (GO	0090087) 600 1 1.95 - .51 1.00E00 1.00E00
chordate embryonic development (GO	0043009) 601 1 1.96 - .51 1.00E00 1.00E00
cellular component morphogenesis (GO	0032989) 604 1 1.96 - .51 1.00E00 1.00E00
regulation of protein phosphorylation (GO	0001932) 1210 2 3.94 - .51 4.38E-01 1.00E00
cell projection organization (GO	0030030) 1212 2 3.94 - .51 4.38E-01 1.00E00
positive regulation of kinase activity (GO	0033674) 608 1 1.98 - .51 7.25E-01 1.00E00
organelle localization (GO	0051640) 616 1 2.00 - .50 7.25E-01 1.00E00
hematopoietic or lymphoid organ development (GO	0048534) 619 1 2.01 - .50 7.25E-01 1.00E00
embryo development ending in birth or egg hatching (GO	0009792) 620 1 2.02 - .50 7.25E-01 1.00E00
generation of neurons (GO	0048699) 1249 2 4.06 - .49 4.39E-01 1.00E00
positive regulation of cell death (GO	0010942) 627 1 2.04 - .49 7.25E-01 1.00E00
cellular protein catabolic process (GO	0044257) 629 1 2.05 - .49 7.25E-01 1.00E00
leukocyte activation involved in immune response (GO	0002366) 630 1 2.05 - .49 7.25E-01 1.00E00
cell activation involved in immune response (GO	0002263) 634 1 2.06 - .48 7.25E-01 1.00E00
phosphate-containing compound metabolic process (GO	0006796) 1906 3 6.20 - .48 2.85E-01 1.00E00
cellular cation homeostasis (GO	0030003) 636 1 2.07 - .48 7.25E-01 1.00E00
cation transmembrane transport (GO	0098655) 637 1 2.07 - .48 7.25E-01 1.00E00
cellular ion homeostasis (GO	0006873) 650 1 2.11 - .47 7.26E-01 1.00E00
inorganic ion transmembrane transport (GO	0098660) 664 1 2.16 - .46 7.26E-01 1.00E00
protein catabolic process (GO	0030163) 683 1 2.22 - .45 7.28E-01 1.00E00
protein phosphorylation (GO	0006468) 684 1 2.23 - .45 7.28E-01 1.00E00
regulation of cellular response to stress (GO	0080135) 685 1 2.23 - .45 7.28E-01 1.00E00
positive regulation of transferase activity (GO	0051347) 687 1 2.23 - .45 7.28E-01 1.00E00
nervous system process (GO	0050877) 1380 2 4.49 - .45 3.25E-01 1.00E00
regulated exocytosis (GO	0045055) 693 1 2.25 - .44 7.29E-01 1.00E00
gamete generation (GO	0007276) 694 1 2.26 - .44 7.29E-01 1.00E00
chromatin organization (GO	0006325) 697 1 2.27 - .44 7.29E-01 1.00E00
cation homeostasis (GO	0055080) 705 1 2.29 - .44 7.30E-01 1.00E00
positive regulation of ion transport (GO	0043270) 709 1 2.31 - .43 7.31E-01 1.00E00
cell morphogenesis (GO	0000902) 711 1 2.31 - .43 7.31E-01 1.00E00
inorganic ion homeostasis (GO	0098771) 716 1 2.33 - .43 7.32E-01 1.00E00
positive regulation of cellular protein metabolic process (GO	0032270) 1456 2 4.74 - .42 3.32E-01 1.00E00
protein ubiquitination (GO	0016567) 741 1 2.41 - .41 7.35E-01 1.00E00
positive regulation of metabolic process (GO	0009893) 3719 5 12.10 - .41 2.44E-02 1.00E00
cellular chemical homeostasis (GO	0055082) 749 1 2.44 - .41 5.21E-01 1.00E00
cellular protein modification process (GO	0006464) 3019 4 9.82 - .41 5.42E-02 1.00E00
protein modification process (GO	0036211) 3019 4 9.82 - .41 5.42E-02 1.00E00
ion homeostasis (GO	0050801) 764 1 2.49 - .40 5.21E-01 1.00E00
positive regulation of protein metabolic process (GO	0051247) 1538 2 5.00 - .40 2.39E-01 1.00E00
exocytosis (GO	0006887) 785 1 2.55 - .39 5.22E-01 1.00E00
regulation of cellular component organization (GO	0051128) 2360 3 7.68 - .39 8.20E-02 1.00E00
cellular response to DNA damage stimulus (GO	0006974) 787 1 2.56 - .39 5.22E-01 1.00E00
head development (GO	0060322) 788 1 2.56 - .39 5.22E-01 1.00E00
regulation of protein kinase activity (GO	0045859) 797 1 2.59 - .39 5.23E-01 1.00E00
RNA metabolic process (GO	0016070) 1599 2 5.20 - .38 1.72E-01 1.00E00
positive regulation of cellular metabolic process (GO	0031325) 3238 4 10.53 - .38 2.73E-02 1.00E00
macromolecule modification (GO	0043412) 3240 4 10.54 - .38 2.73E-02 1.00E00
positive regulation of nucleic acid-templated transcription (GO	1903508) 1622 2 5.28 - .38 1.72E-01 1.00E00
positive regulation of transcription, DNA-templated (GO	0045893) 1622 2 5.28 - .38 1.72E-01 1.00E00
positive regulation of RNA biosynthetic process (GO	1902680) 1623 2 5.28 - .38 1.72E-01 1.00E00
protein modification by small protein conjugation (GO	0032446) 821 1 2.67 - .37 5.25E-01 1.00E00
multicellular organismal reproductive process (GO	0048609) 822 1 2.67 - .37 5.25E-01 1.00E00
cation transport (GO	0006812) 826 1 2.69 - .37 5.25E-01 1.00E00
positive regulation of protein phosphorylation (GO	0001934) 828 1 2.69 - .37 5.26E-01 1.00E00
homeostatic process (GO	0042592) 1659 2 5.40 - .37 1.73E-01 1.00E00
neuron development (GO	0048666) 833 1 2.71 - .37 5.26E-01 1.00E00
multicellular organism reproduction (GO	0032504) 841 1 2.74 - .37 5.28E-01 1.00E00
positive regulation of macromolecule metabolic process (GO	0010604) 3431 4 11.16 - .36 1.97E-02 1.00E00
positive regulation of RNA metabolic process (GO	0051254) 1718 2 5.59 - .36 1.77E-01 1.00E00
regulation of anion transport (GO	0044070) 860 1 2.80 - .36 5.31E-01 1.00E00
cellular response to stress (GO	0033554) 1755 2 5.71 - .35 1.24E-01 1.00E00
cellular homeostasis (GO	0019725) 888 1 2.89 - .35 3.71E-01 1.00E00
cellular macromolecule catabolic process (GO	0044265) 912 1 2.97 - .34 3.72E-01 1.00E00
positive regulation of macromolecule biosynthetic process (GO	0010557) 1853 2 6.03 - .33 8.85E-02 1.00E00
positive regulation of transport (GO	0051050) 936 1 3.05 - .33 3.73E-01 1.00E00
positive regulation of nucleobase-containing compound metabolic process (GO	0045935) 1891 2 6.15 - .33 8.83E-02 1.00E00
secretion by cell (GO	0032940) 948 1 3.08 - .32 3.74E-01 1.00E00
developmental process involved in reproduction (GO	0003006) 956 1 3.11 - .32 3.75E-01 1.00E00
regulation of cellular component biogenesis (GO	0044087) 967 1 3.15 - .32 3.77E-01 1.00E00
positive regulation of cellular biosynthetic process (GO	0031328) 1956 2 6.36 - .31 9.00E-02 1.00E00
positive regulation of biosynthetic process (GO	0009891) 1990 2 6.47 - .31 6.25E-02 1.00E00
export from cell (GO	0140352) 996 1 3.24 - .31 3.81E-01 1.00E00
positive regulation of nitrogen compound metabolic process (GO	0051173) 3058 3 9.95 - .30 1.45E-02 1.00E00
phosphorylation (GO	0016310) 1022 1 3.32 - .30 2.63E-01 1.00E00
protein modification by small protein conjugation or removal (GO	0070647) 1031 1 3.35 - .30 2.63E-01 1.00E00
macromolecule catabolic process (GO	0009057) 1046 1 3.40 - .29 2.63E-01 1.00E00
positive regulation of protein modification process (GO	0031401) 1061 1 3.45 - .29 2.64E-01 1.00E00
secretion (GO	0046903) 1061 1 3.45 - .29 2.64E-01 1.00E00
chemical homeostasis (GO	0048878) 1124 1 3.66 - .27 2.71E-01 1.00E00
positive regulation of transcription by RNA polymerase II (GO	0045944) 1206 1 3.92 - .25 1.86E-01 1.00E00
movement of cell or subcellular component (GO	0006928) 1591 1 5.18 - .19 6.22E-02 1.00E00
respiratory burst involved in defense response (GO	0002679) 7 0 .02 - < 0.01 1.00E00 1.00E00
response to lead ion (GO	0010288) 23 0 .07 - < 0.01 1.00E00 1.00E00
positive regulation of chronic inflammatory response (GO	0002678) 3 0 .01 - < 0.01 1.00E00 1.00E00
negative regulation of chronic inflammatory response (GO	0002677) 4 0 .01 - < 0.01 1.00E00 1.00E00
heat acclimation (GO	0010286) 5 0 .02 - < 0.01 1.00E00 1.00E00
regulation of chronic inflammatory response (GO	0002676) 8 0 .03 - < 0.01 1.00E00 1.00E00
positive regulation of acute inflammatory response (GO	0002675) 27 0 .09 - < 0.01 1.00E00 1.00E00
negative regulation of acute inflammatory response (GO	0002674) 13 0 .04 - < 0.01 1.00E00 1.00E00
regulation of acute inflammatory response (GO	0002673) 48 0 .16 - < 0.01 1.00E00 1.00E00
carbohydrate transmembrane transport (GO	0034219) 41 0 .13 - < 0.01 1.00E00 1.00E00
quinolinate catabolic process (GO	0034213) 1 0 .00 - < 0.01 1.00E00 1.00E00
detoxification of copper ion (GO	0010273) 16 0 .05 - < 0.01 1.00E00 1.00E00
positive regulation of B cell tolerance induction (GO	0002663) 2 0 .01 - < 0.01 1.00E00 1.00E00
response to silver ion (GO	0010272) 1 0 .00 - < 0.01 1.00E00 1.00E00
regulation of B cell tolerance induction (GO	0002661) 2 0 .01 - < 0.01 1.00E00 1.00E00
positive regulation of peripheral tolerance induction (GO	0002660) 2 0 .01 - < 0.01 1.00E00 1.00E00
amyloid-beta formation (GO	0034205) 10 0 .03 - < 0.01 1.00E00 1.00E00
glycolipid translocation (GO	0034203) 1 0 .00 - < 0.01 1.00E00 1.00E00
response to oleic acid (GO	0034201) 6 0 .02 - < 0.01 1.00E00 1.00E00
response to selenium ion (GO	0010269) 11 0 .04 - < 0.01 1.00E00 1.00E00
regulation of peripheral tolerance induction (GO	0002658) 2 0 .01 - < 0.01 1.00E00 1.00E00
response to vitamin B1 (GO	0010266) 3 0 .01 - < 0.01 1.00E00 1.00E00
SCF complex assembly (GO	0010265) 6 0 .02 - < 0.01 1.00E00 1.00E00
positive regulation of tolerance induction dependent upon immune response (GO	0002654) 2 0 .01 - < 0.01 1.00E00 1.00E00
regulation of tolerance induction dependent upon immune response (GO	0002652) 3 0 .01 - < 0.01 1.00E00 1.00E00
positive regulation of tolerance induction to self antigen (GO	0002651) 1 0 .00 - < 0.01 1.00E00 1.00E00
animal organ senescence (GO	0010260) 3 0 .01 - < 0.01 1.00E00 1.00E00
positive regulation of chromatin assembly or disassembly (GO	0045799) 14 0 .05 - < 0.01 1.00E00 1.00E00
negative regulation of chromatin assembly or disassembly (GO	0045798) 5 0 .02 - < 0.01 1.00E00 1.00E00
positive regulation of intestinal cholesterol absorption (GO	0045797) 3 0 .01 - < 0.01 1.00E00 1.00E00
negative regulation of intestinal cholesterol absorption (GO	0045796) 2 0 .01 - < 0.01 1.00E00 1.00E00
positive regulation of cell volume (GO	0045795) 1 0 .00 - < 0.01 1.00E00 1.00E00
negative regulation of cell volume (GO	0045794) 5 0 .02 - < 0.01 1.00E00 1.00E00
positive regulation of cell size (GO	0045793) 12 0 .04 - < 0.01 1.00E00 1.00E00
negative regulation of cell size (GO	0045792) 10 0 .03 - < 0.01 1.00E00 1.00E00
multicellular organism aging (GO	0010259) 35 0 .11 - < 0.01 1.00E00 1.00E00
regulation of tolerance induction to self antigen (GO	0002649) 1 0 .00 - < 0.01 1.00E00 1.00E00
positive regulation of central tolerance induction (GO	0002648) 1 0 .00 - < 0.01 1.00E00 1.00E00
NADH dehydrogenase complex assembly (GO	0010257) 66 0 .21 - < 0.01 1.00E00 1.00E00
regulation of central tolerance induction (GO	0002646) 1 0 .00 - < 0.01 1.00E00 1.00E00
glucose mediated signaling pathway (GO	0010255) 3 0 .01 - < 0.01 1.00E00 1.00E00
positive regulation of bone resorption (GO	0045780) 20 0 .07 - < 0.01 1.00E00 1.00E00
positive regulation of immunoglobulin production (GO	0002639) 45 0 .15 - < 0.01 1.00E00 1.00E00
establishment or maintenance of transmembrane electrochemical gradient (GO	0010248) 13 0 .04 - < 0.01 1.00E00 1.00E00
negative regulation of immunoglobulin production (GO	0002638) 14 0 .05 - < 0.01 1.00E00 1.00E00
regulation of immunoglobulin production (GO	0002637) 68 0 .22 - < 0.01 1.00E00 1.00E00
positive regulation of germinal center formation (GO	0002636) 2 0 .01 - < 0.01 1.00E00 1.00E00
negative regulation of germinal center formation (GO	0002635) 2 0 .01 - < 0.01 1.00E00 1.00E00
regulation of germinal center formation (GO	0002634) 8 0 .03 - < 0.01 1.00E00 1.00E00
negative regulation of bone resorption (GO	0045779) 17 0 .06 - < 0.01 1.00E00 1.00E00
positive regulation of ossification (GO	0045778) 50 0 .16 - < 0.01 1.00E00 1.00E00
positive regulation of blood pressure (GO	0045777) 38 0 .12 - < 0.01 1.00E00 1.00E00
negative regulation of blood pressure (GO	0045776) 44 0 .14 - < 0.01 1.00E00 1.00E00
positive regulation of axon extension (GO	0045773) 41 0 .13 - < 0.01 1.00E00 1.00E00
negative regulation of T cell antigen processing and presentation (GO	0002626) 1 0 .00 - < 0.01 1.00E00 1.00E00
regulation of T cell antigen processing and presentation (GO	0002625) 2 0 .01 - < 0.01 1.00E00 1.00E00
regulation of B cell antigen processing and presentation (GO	0002622) 1 0 .00 - < 0.01 1.00E00 1.00E00
positive regulation of angiogenesis (GO	0045766) 156 0 .51 - < 0.01 1.00E00 1.00E00
regulation of angiogenesis (GO	0045765) 277 0 .90 - < 0.01 1.00E00 1.00E00
positive regulation of cellular amino acid metabolic process (GO	0045764) 3 0 .01 - < 0.01 1.00E00 1.00E00
negative regulation of cellular amino acid metabolic process (GO	0045763) 3 0 .01 - < 0.01 1.00E00 1.00E00
positive regulation of adenylate cyclase activity (GO	0045762) 10 0 .03 - < 0.01 1.00E00 1.00E00
regulation of adenylate cyclase activity (GO	0045761) 33 0 .11 - < 0.01 1.00E00 1.00E00
positive regulation of action potential (GO	0045760) 7 0 .02 - < 0.01 1.00E00 1.00E00
negative regulation of macrophage antigen processing and presentation (GO	0002617) 1 0 .00 - < 0.01 1.00E00 1.00E00
response to lithium ion (GO	0010226) 21 0 .07 - < 0.01 1.00E00 1.00E00
regulation of macrophage antigen processing and presentation (GO	0002616) 1 0 .00 - < 0.01 1.00E00 1.00E00
response to UV-C (GO	0010225) 16 0 .05 - < 0.01 1.00E00 1.00E00
response to UV-B (GO	0010224) 17 0 .06 - < 0.01 1.00E00 1.00E00
negative regulation of action potential (GO	0045759) 6 0 .02 - < 0.01 1.00E00 1.00E00
negative regulation of Toll signaling pathway (GO	0045751) 1 0 .00 - < 0.01 1.00E00 1.00E00
maintenance of DNA methylation (GO	0010216) 7 0 .02 - < 0.01 1.00E00 1.00E00
positive regulation of dendritic cell antigen processing and presentation (GO	0002606) 7 0 .02 - < 0.01 1.00E00 1.00E00
negative regulation of dendritic cell antigen processing and presentation (GO	0002605) 4 0 .01 - < 0.01 1.00E00 1.00E00
regulation of dendritic cell antigen processing and presentation (GO	0002604) 11 0 .04 - < 0.01 1.00E00 1.00E00
response to ionizing radiation (GO	0010212) 146 0 .47 - < 0.01 1.00E00 1.00E00
regulation of hexokinase activity (GO	1903299) 11 0 .04 - < 0.01 1.00E00 1.00E00
negative regulation of hypoxia-induced intrinsic apoptotic signaling pathway (GO	1903298) 5 0 .02 - < 0.01 1.00E00 1.00E00
regulation of hypoxia-induced intrinsic apoptotic signaling pathway (GO	1903297) 5 0 .02 - < 0.01 1.00E00 1.00E00
positive regulation of Notch signaling pathway (GO	0045747) 55 0 .18 - < 0.01 1.00E00 1.00E00
positive regulation of glutamate secretion, neurotransmission (GO	1903296) 3 0 .01 - < 0.01 1.00E00 1.00E00
negative regulation of Notch signaling pathway (GO	0045746) 39 0 .13 - < 0.01 1.00E00 1.00E00
positive regulation of G protein-coupled receptor signaling pathway (GO	0045745) 27 0 .09 - < 0.01 1.00E00 1.00E00
regulation of glutamate secretion, neurotransmission (GO	1903294) 3 0 .01 - < 0.01 1.00E00 1.00E00
negative regulation of G protein-coupled receptor signaling pathway (GO	0045744) 48 0 .16 - < 0.01 1.00E00 1.00E00
positive regulation of fibroblast growth factor receptor signaling pathway (GO	0045743) 8 0 .03 - < 0.01 1.00E00 1.00E00
protein localization to Golgi membrane (GO	1903292) 3 0 .01 - < 0.01 1.00E00 1.00E00
positive regulation of epidermal growth factor receptor signaling pathway (GO	0045742) 38 0 .12 - < 0.01 1.00E00 1.00E00
positive regulation of epidermal growth factor-activated receptor activity (GO	0045741) 13 0 .04 - < 0.01 1.00E00 1.00E00
positive regulation of DNA replication (GO	0045740) 40 0 .13 - < 0.01 1.00E00 1.00E00
positive regulation of DNA repair (GO	0045739) 76 0 .25 - < 0.01 1.00E00 1.00E00
positive regulation of potassium ion import across plasma membrane (GO	1903288) 7 0 .02 - < 0.01 1.00E00 1.00E00
negative regulation of DNA repair (GO	0045738) 35 0 .11 - < 0.01 1.00E00 1.00E00
arginine catabolic process to proline (GO	0019493) 1 0 .00 - < 0.01 1.00E00 1.00E00
positive regulation of cyclin-dependent protein serine/threonine kinase activity (GO	0045737) 32 0 .10 - < 0.01 1.00E00 1.00E00
regulation of potassium ion import (GO	1903286) 8 0 .03 - < 0.01 1.00E00 1.00E00
negative regulation of cyclin-dependent protein serine/threonine kinase activity (GO	0045736) 29 0 .09 - < 0.01 1.00E00 1.00E00
positive regulation of hydrogen peroxide catabolic process (GO	1903285) 2 0 .01 - < 0.01 1.00E00 1.00E00
positive regulation of glutathione peroxidase activity (GO	1903284) 1 0 .00 - < 0.01 1.00E00 1.00E00
regulation of glutathione peroxidase activity (GO	1903282) 1 0 .00 - < 0.01 1.00E00 1.00E00
positive regulation of calcium	sodium antiporter activity (GO	1903281) 2 0 .01 - < 0.01 1.00E00 1.00E00
negative regulation of calcium	sodium antiporter activity (GO	1903280) 1 0 .00 - < 0.01 1.00E00 1.00E00
respiratory burst (GO	0045730) 21 0 .07 - < 0.01 1.00E00 1.00E00
response to glucagon (GO	0033762) 39 0 .13 - < 0.01 1.00E00 1.00E00
cerebral cortex radially oriented cell migration (GO	0021799) 34 0 .11 - < 0.01 1.00E00 1.00E00
forebrain dorsal/ventral pattern formation (GO	0021798) 6 0 .02 - < 0.01 1.00E00 1.00E00
forebrain anterior/posterior pattern specification (GO	0021797) 3 0 .01 - < 0.01 1.00E00 1.00E00
cerebral cortex regionalization (GO	0021796) 6 0 .02 - < 0.01 1.00E00 1.00E00
cerebral cortex cell migration (GO	0021795) 44 0 .14 - < 0.01 1.00E00 1.00E00
thalamus development (GO	0021794) 14 0 .05 - < 0.01 1.00E00 1.00E00
chemorepulsion of branchiomotor axon (GO	0021793) 1 0 .00 - < 0.01 1.00E00 1.00E00
regulation of calcium	sodium antiporter activity (GO	1903279) 3 0 .01 - < 0.01 1.00E00 1.00E00
positive regulation of sodium ion export across plasma membrane (GO	1903278) 4 0 .01 - < 0.01 1.00E00 1.00E00
respiratory burst after phagocytosis (GO	0045728) 3 0 .01 - < 0.01 1.00E00 1.00E00
beta-alanine biosynthetic process (GO	0019483) 2 0 .01 - < 0.01 1.00E00 1.00E00
positive regulation of translation (GO	0045727) 136 0 .44 - < 0.01 1.00E00 1.00E00
regulation of sodium ion export across plasma membrane (GO	1903276) 4 0 .01 - < 0.01 1.00E00 1.00E00
beta-alanine metabolic process (GO	0019482) 4 0 .01 - < 0.01 1.00E00 1.00E00
positive regulation of integrin biosynthetic process (GO	0045726) 3 0 .01 - < 0.01 1.00E00 1.00E00
L-alanine catabolic process, by transamination (GO	0019481) 1 0 .00 - < 0.01 1.00E00 1.00E00
positive regulation of glycogen biosynthetic process (GO	0045725) 16 0 .05 - < 0.01 1.00E00 1.00E00
positive regulation of cilium assembly (GO	0045724) 24 0 .08 - < 0.01 1.00E00 1.00E00
positive regulation of fatty acid biosynthetic process (GO	0045723) 21 0 .07 - < 0.01 1.00E00 1.00E00
positive regulation of gluconeogenesis (GO	0045722) 13 0 .04 - < 0.01 1.00E00 1.00E00
negative regulation of gluconeogenesis (GO	0045721) 18 0 .06 - < 0.01 1.00E00 1.00E00
negative regulation of integrin biosynthetic process (GO	0045720) 2 0 .01 - < 0.01 1.00E00 1.00E00
ribosome localization (GO	0033750) 13 0 .04 - < 0.01 1.00E00 1.00E00
branchiomotor neuron axon guidance (GO	0021785) 5 0 .02 - < 0.01 1.00E00 1.00E00
postganglionic parasympathetic fiber development (GO	0021784) 2 0 .01 - < 0.01 1.00E00 1.00E00
preganglionic parasympathetic fiber development (GO	0021783) 15 0 .05 - < 0.01 1.00E00 1.00E00
D-amino acid catabolic process (GO	0019478) 2 0 .01 - < 0.01 1.00E00 1.00E00
L-lysine catabolic process (GO	0019477) 4 0 .01 - < 0.01 1.00E00 1.00E00
glial cell fate specification (GO	0021780) 4 0 .01 - < 0.01 1.00E00 1.00E00
negative regulation of glycogen biosynthetic process (GO	0045719) 7 0 .02 - < 0.01 1.00E00 1.00E00
L-lysine catabolic process to acetyl-CoA (GO	0019474) 4 0 .01 - < 0.01 1.00E00 1.00E00
negative regulation of fatty acid biosynthetic process (GO	0045717) 15 0 .05 - < 0.01 1.00E00 1.00E00
positive regulation of tumor necrosis factor-mediated signaling pathway (GO	1903265) 11 0 .04 - < 0.01 1.00E00 1.00E00
4-hydroxyproline metabolic process (GO	0019471) 4 0 .01 - < 0.01 1.00E00 1.00E00
4-hydroxyproline catabolic process (GO	0019470) 4 0 .01 - < 0.01 1.00E00 1.00E00
oligodendrocyte cell fate commitment (GO	0021779) 4 0 .01 - < 0.01 1.00E00 1.00E00
oligodendrocyte cell fate specification (GO	0021778) 4 0 .01 - < 0.01 1.00E00 1.00E00
smoothened signaling pathway involved in spinal cord motor neuron cell fate specification (GO	0021776) 3 0 .01 - < 0.01 1.00E00 1.00E00
smoothened signaling pathway involved in ventral spinal cord interneuron specification (GO	0021775) 3 0 .01 - < 0.01 1.00E00 1.00E00
striatal medium spiny neuron differentiation (GO	0021773) 4 0 .01 - < 0.01 1.00E00 1.00E00
olfactory bulb development (GO	0021772) 30 0 .10 - < 0.01 1.00E00 1.00E00
lateral geniculate nucleus development (GO	0021771) 1 0 .00 - < 0.01 1.00E00 1.00E00
exon-exon junction complex disassembly (GO	1903259) 1 0 .00 - < 0.01 1.00E00 1.00E00
glycine decarboxylation via glycine cleavage system (GO	0019464) 3 0 .01 - < 0.01 1.00E00 1.00E00
ectoderm and mesoderm interaction (GO	0007499) 1 0 .00 - < 0.01 1.00E00 1.00E00
mesoderm development (GO	0007498) 120 0 .39 - < 0.01 1.00E00 1.00E00
multi-ciliated epithelial cell differentiation (GO	1903251) 9 0 .03 - < 0.01 1.00E00 1.00E00
posterior midgut development (GO	0007497) 2 0 .01 - < 0.01 1.00E00 1.00E00
visceral mesoderm-endoderm interaction involved in midgut development (GO	0007495) 1 0 .00 - < 0.01 1.00E00 1.00E00
midgut development (GO	0007494) 13 0 .04 - < 0.01 1.00E00 1.00E00
endodermal cell fate determination (GO	0007493) 2 0 .01 - < 0.01 1.00E00 1.00E00
endoderm development (GO	0007492) 75 0 .24 - < 0.01 1.00E00 1.00E00
orbitofrontal cortex development (GO	0021769) 3 0 .01 - < 0.01 1.00E00 1.00E00
nucleus accumbens development (GO	0021768) 1 0 .00 - < 0.01 1.00E00 1.00E00
mammillary body development (GO	0021767) 1 0 .00 - < 0.01 1.00E00 1.00E00
hippocampus development (GO	0021766) 78 0 .25 - < 0.01 1.00E00 1.00E00
amygdala development (GO	0021764) 4 0 .01 - < 0.01 1.00E00 1.00E00
substantia nigra development (GO	0021762) 46 0 .15 - < 0.01 1.00E00 1.00E00
limbic system development (GO	0021761) 103 0 .34 - < 0.01 1.00E00 1.00E00
negative regulation of citrulline biosynthetic process (GO	1903249) 1 0 .00 - < 0.01 1.00E00 1.00E00
regulation of citrulline biosynthetic process (GO	1903248) 1 0 .00 - < 0.01 1.00E00 1.00E00
L-cysteine catabolic process to taurine (GO	0019452) 1 0 .00 - < 0.01 1.00E00 1.00E00
positive regulation of cardiac muscle hypertrophy in response to stress (GO	1903244) 2 0 .01 - < 0.01 1.00E00 1.00E00
negative regulation of cardiac muscle hypertrophy in response to stress (GO	1903243) 6 0 .02 - < 0.01 1.00E00 1.00E00
regulation of cardiac muscle hypertrophy in response to stress (GO	1903242) 9 0 .03 - < 0.01 1.00E00 1.00E00
U2-type prespliceosome assembly (GO	1903241) 3 0 .01 - < 0.01 1.00E00 1.00E00
globus pallidus development (GO	0021759) 3 0 .01 - < 0.01 1.00E00 1.00E00
putamen development (GO	0021758) 1 0 .00 - < 0.01 1.00E00 1.00E00
caudate nucleus development (GO	0021757) 1 0 .00 - < 0.01 1.00E00 1.00E00
pronephric duct morphogenesis (GO	0039023) 1 0 .00 - < 0.01 1.00E00 1.00E00
striatum development (GO	0021756) 18 0 .06 - < 0.01 1.00E00 1.00E00
pronephric duct development (GO	0039022) 1 0 .00 - < 0.01 1.00E00 1.00E00
facial nucleus development (GO	0021754) 1 0 .00 - < 0.01 1.00E00 1.00E00
pronephric nephron tubule development (GO	0039020) 2 0 .01 - < 0.01 1.00E00 1.00E00
L-cysteine catabolic process to hypotaurine (GO	0019449) 1 0 .00 - < 0.01 1.00E00 1.00E00
L-cysteine catabolic process (GO	0019448) 4 0 .01 - < 0.01 1.00E00 1.00E00
vestibular nucleus development (GO	0021750) 1 0 .00 - < 0.01 1.00E00 1.00E00
positive regulation of leukocyte tethering or rolling (GO	1903238) 8 0 .03 - < 0.01 1.00E00 1.00E00
negative regulation of leukocyte tethering or rolling (GO	1903237) 4 0 .01 - < 0.01 1.00E00 1.00E00
regulation of leukocyte tethering or rolling (GO	1903236) 13 0 .04 - < 0.01 1.00E00 1.00E00
tryptophan catabolic process to acetyl-CoA (GO	0019442) 2 0 .01 - < 0.01 1.00E00 1.00E00
positive regulation of calcium ion-dependent exocytosis of neurotransmitter (GO	1903235) 1 0 .00 - < 0.01 1.00E00 1.00E00
tryptophan catabolic process to kynurenine (GO	0019441) 5 0 .02 - < 0.01 1.00E00 1.00E00
regulation of calcium ion-dependent exocytosis of neurotransmitter (GO	1903233) 3 0 .01 - < 0.01 1.00E00 1.00E00
melanosome assembly (GO	1903232) 5 0 .02 - < 0.01 1.00E00 1.00E00
pronephric nephron development (GO	0039019) 3 0 .01 - < 0.01 1.00E00 1.00E00
pattern specification involved in pronephros development (GO	0039017) 2 0 .01 - < 0.01 1.00E00 1.00E00
cochlear nucleus development (GO	0021747) 3 0 .01 - < 0.01 1.00E00 1.00E00
embryonic skeletal joint development (GO	0072498) 15 0 .05 - < 0.01 1.00E00 1.00E00
principal sensory nucleus of trigeminal nerve development (GO	0021740) 2 0 .01 - < 0.01 1.00E00 1.00E00
mesenchymal stem cell differentiation (GO	0072497) 4 0 .01 - < 0.01 1.00E00 1.00E00
triglyceride catabolic process (GO	0019433) 27 0 .09 - < 0.01 1.00E00 1.00E00
positive regulation of endodermal cell differentiation (GO	1903226) 1 0 .00 - < 0.01 1.00E00 1.00E00
triglyceride biosynthetic process (GO	0019432) 22 0 .07 - < 0.01 1.00E00 1.00E00
negative regulation of endodermal cell differentiation (GO	1903225) 3 0 .01 - < 0.01 1.00E00 1.00E00
regulation of endodermal cell differentiation (GO	1903224) 5 0 .02 - < 0.01 1.00E00 1.00E00
removal of superoxide radicals (GO	0019430) 13 0 .04 - < 0.01 1.00E00 1.00E00
positive regulation of oxidative stress-induced neuron death (GO	1903223) 7 0 .02 - < 0.01 1.00E00 1.00E00
DNA integration (GO	0015074) 18 0 .06 - < 0.01 1.00E00 1.00E00
pronephric nephron tubule morphogenesis (GO	0039008) 1 0 .00 - < 0.01 1.00E00 1.00E00
pronephric nephron morphogenesis (GO	0039007) 1 0 .00 - < 0.01 1.00E00 1.00E00
phospholipid efflux (GO	0033700) 12 0 .04 - < 0.01 1.00E00 1.00E00
pronephric field specification (GO	0039003) 2 0 .01 - < 0.01 1.00E00 1.00E00
midbrain-hindbrain boundary maturation (GO	0021732) 1 0 .00 - < 0.01 1.00E00 1.00E00
allantoin biosynthetic process (GO	0019428) 1 0 .00 - < 0.01 1.00E00 1.00E00
ammonium transmembrane transport (GO	0072488) 10 0 .03 - < 0.01 1.00E00 1.00E00
acetyl-CoA biosynthetic process from acetate (GO	0019427) 2 0 .01 - < 0.01 1.00E00 1.00E00
trigeminal sensory nucleus development (GO	0021730) 2 0 .01 - < 0.01 1.00E00 1.00E00
negative regulation of protein processing involved in protein targeting to mitochondrion (GO	1903217) 2 0 .01 - < 0.01 1.00E00 1.00E00
regulation of protein processing involved in protein targeting to mitochondrion (GO	1903216) 2 0 .01 - < 0.01 1.00E00 1.00E00
negative regulation of protein targeting to mitochondrion (GO	1903215) 6 0 .02 - < 0.01 1.00E00 1.00E00
regulation of protein targeting to mitochondrion (GO	1903214) 45 0 .15 - < 0.01 1.00E00 1.00E00
positive regulation of the force of heart contraction by chemical signal (GO	0003099) 3 0 .01 - < 0.01 1.00E00 1.00E00
renal water transport (GO	0003097) 5 0 .02 - < 0.01 1.00E00 1.00E00
renal sodium ion transport (GO	0003096) 7 0 .02 - < 0.01 1.00E00 1.00E00
pressure natriuresis (GO	0003095) 3 0 .01 - < 0.01 1.00E00 1.00E00
glomerular filtration (GO	0003094) 14 0 .05 - < 0.01 1.00E00 1.00E00
regulation of glomerular filtration (GO	0003093) 11 0 .04 - < 0.01 1.00E00 1.00E00
renal water homeostasis (GO	0003091) 38 0 .12 - < 0.01 1.00E00 1.00E00
medullary reticular formation development (GO	0021723) 1 0 .00 - < 0.01 1.00E00 1.00E00
superior olivary nucleus maturation (GO	0021722) 2 0 .01 - < 0.01 1.00E00 1.00E00
sulfide oxidation (GO	0019418) 5 0 .02 - < 0.01 1.00E00 1.00E00
sulfur oxidation (GO	0019417) 2 0 .01 - < 0.01 1.00E00 1.00E00
positive regulation of oxidative stress-induced cell death (GO	1903209) 17 0 .06 - < 0.01 1.00E00 1.00E00
negative regulation of hydrogen peroxide-induced neuron death (GO	1903208) 6 0 .02 - < 0.01 1.00E00 1.00E00
regulation of hydrogen peroxide-induced neuron death (GO	1903207) 6 0 .02 - < 0.01 1.00E00 1.00E00
acetate biosynthetic process (GO	0019413) 2 0 .01 - < 0.01 1.00E00 1.00E00
negative regulation of hydrogen peroxide-induced cell death (GO	1903206) 16 0 .05 - < 0.01 1.00E00 1.00E00
regulation of hydrogen peroxide-induced cell death (GO	1903205) 21 0 .07 - < 0.01 1.00E00 1.00E00
negative regulation of oxidative stress-induced neuron death (GO	1903204) 17 0 .06 - < 0.01 1.00E00 1.00E00
regulation of oxidative stress-induced neuron death (GO	1903203) 25 0 .08 - < 0.01 1.00E00 1.00E00
negative regulation of oxidative stress-induced cell death (GO	1903202) 43 0 .14 - < 0.01 1.00E00 1.00E00
regulation of oxidative stress-induced cell death (GO	1903201) 63 0 .20 - < 0.01 1.00E00 1.00E00
positive regulation of L-dopa decarboxylase activity (GO	1903200) 1 0 .00 - < 0.01 1.00E00 1.00E00
hindgut morphogenesis (GO	0007442) 6 0 .02 - < 0.01 1.00E00 1.00E00
foregut morphogenesis (GO	0007440) 9 0 .03 - < 0.01 1.00E00 1.00E00
negative regulation of systemic arterial blood pressure (GO	0003085) 19 0 .06 - < 0.01 1.00E00 1.00E00
positive regulation of systemic arterial blood pressure (GO	0003084) 15 0 .05 - < 0.01 1.00E00 1.00E00
negative regulation of renal output by angiotensin (GO	0003083) 1 0 .00 - < 0.01 1.00E00 1.00E00
superior olivary nucleus development (GO	0021718) 2 0 .01 - < 0.01 1.00E00 1.00E00
regulation of systemic arterial blood pressure by renin-angiotensin (GO	0003081) 20 0 .07 - < 0.01 1.00E00 1.00E00
positive regulation of behavioral fear response (GO	2000987) 7 0 .02 - < 0.01 1.00E00 1.00E00
dolichol biosynthetic process (GO	0019408) 2 0 .01 - < 0.01 1.00E00 1.00E00
negative regulation of behavioral fear response (GO	2000986) 1 0 .00 - < 0.01 1.00E00 1.00E00
hexitol catabolic process (GO	0019407) 1 0 .00 - < 0.01 1.00E00 1.00E00
hexitol biosynthetic process (GO	0019406) 1 0 .00 - < 0.01 1.00E00 1.00E00
negative regulation of ATP citrate synthase activity (GO	2000984) 1 0 .00 - < 0.01 1.00E00 1.00E00
alditol catabolic process (GO	0019405) 8 0 .03 - < 0.01 1.00E00 1.00E00
regulation of ATP citrate synthase activity (GO	2000983) 1 0 .00 - < 0.01 1.00E00 1.00E00
positive regulation of inner ear receptor cell differentiation (GO	2000982) 1 0 .00 - < 0.01 1.00E00 1.00E00
negative regulation of inner ear receptor cell differentiation (GO	2000981) 4 0 .01 - < 0.01 1.00E00 1.00E00
galactitol metabolic process (GO	0019402) 1 0 .00 - < 0.01 1.00E00 1.00E00
regulation of inner ear receptor cell differentiation (GO	2000980) 8 0 .03 - < 0.01 1.00E00 1.00E00
alditol biosynthetic process (GO	0019401) 7 0 .02 - < 0.01 1.00E00 1.00E00
alditol metabolic process (GO	0019400) 24 0 .08 - < 0.01 1.00E00 1.00E00
ectodermal digestive tract development (GO	0007439) 2 0 .01 - < 0.01 1.00E00 1.00E00
mesenchymal-epithelial cell signaling involved in lung development (GO	0060496) 1 0 .00 - < 0.01 1.00E00 1.00E00
salivary gland morphogenesis (GO	0007435) 27 0 .09 - < 0.01 1.00E00 1.00E00
cell-cell signaling involved in lung development (GO	0060495) 2 0 .01 - < 0.01 1.00E00 1.00E00
lung induction (GO	0060492) 3 0 .01 - < 0.01 1.00E00 1.00E00
salivary gland development (GO	0007431) 29 0 .09 - < 0.01 1.00E00 1.00E00
regulation of cell projection assembly (GO	0060491) 187 0 .61 - < 0.01 1.00E00 1.00E00
lateral sprouting involved in lung morphogenesis (GO	0060490) 1 0 .00 - < 0.01 1.00E00 1.00E00
regulation of systemic arterial blood pressure (GO	0003073) 97 0 .32 - < 0.01 1.00E00 1.00E00
renal control of peripheral vascular resistance involved in regulation of systemic arterial blood pressure (GO	0003072) 3 0 .01 - < 0.01 1.00E00 1.00E00
cerebellar granule cell differentiation (GO	0021707) 8 0 .03 - < 0.01 1.00E00 1.00E00
renal system process involved in regulation of systemic arterial blood pressure (GO	0003071) 23 0 .07 - < 0.01 1.00E00 1.00E00
regulation of systemic arterial blood pressure by neurotransmitter (GO	0003070) 1 0 .00 - < 0.01 1.00E00 1.00E00
positive regulation of forebrain neuron differentiation (GO	2000979) 1 0 .00 - < 0.01 1.00E00 1.00E00
locus ceruleus development (GO	0021703) 1 0 .00 - < 0.01 1.00E00 1.00E00
negative regulation of forebrain neuron differentiation (GO	2000978) 3 0 .01 - < 0.01 1.00E00 1.00E00
cerebellar Purkinje cell differentiation (GO	0021702) 11 0 .04 - < 0.01 1.00E00 1.00E00
regulation of forebrain neuron differentiation (GO	2000977) 5 0 .02 - < 0.01 1.00E00 1.00E00
developmental maturation (GO	0021700) 229 0 .74 - < 0.01 1.00E00 1.00E00
positive regulation of pro-B cell differentiation (GO	2000975) 1 0 .00 - < 0.01 1.00E00 1.00E00
negative regulation of pro-B cell differentiation (GO	2000974) 3 0 .01 - < 0.01 1.00E00 1.00E00
regulation of pro-B cell differentiation (GO	2000973) 8 0 .03 - < 0.01 1.00E00 1.00E00
negative regulation of detection of glucose (GO	2000971) 1 0 .00 - < 0.01 1.00E00 1.00E00
regulation of detection of glucose (GO	2000970) 1 0 .00 - < 0.01 1.00E00 1.00E00
planar dichotomous subdivision of terminal units involved in lung branching morphogenesis (GO	0060489) 1 0 .00 - < 0.01 1.00E00 1.00E00
orthogonal dichotomous subdivision of terminal units involved in lung branching morphogenesis (GO	0060488) 1 0 .00 - < 0.01 1.00E00 1.00E00
club cell differentiation (GO	0060486) 4 0 .01 - < 0.01 1.00E00 1.00E00
lung-associated mesenchyme development (GO	0060484) 6 0 .02 - < 0.01 1.00E00 1.00E00
peripheral nervous system development (GO	0007422) 77 0 .25 - < 0.01 1.00E00 1.00E00
lobar bronchus development (GO	0060482) 5 0 .02 - < 0.01 1.00E00 1.00E00
lobar bronchus epithelium development (GO	0060481) 4 0 .01 - < 0.01 1.00E00 1.00E00
acetylcholine-mediated vasodilation involved in regulation of systemic arterial blood pressure (GO	0003069) 1 0 .00 - < 0.01 1.00E00 1.00E00
brain development (GO	0007420) 745 0 2.42 - < 0.01 1.79E-01 1.00E00
lung goblet cell differentiation (GO	0060480) 3 0 .01 - < 0.01 1.00E00 1.00E00
regulation of systemic arterial blood pressure by acetylcholine (GO	0003068) 1 0 .00 - < 0.01 1.00E00 1.00E00
positive regulation of heart rate by epinephrine (GO	0003065) 1 0 .00 - < 0.01 1.00E00 1.00E00
regulation of heart rate by hormone (GO	0003064) 2 0 .01 - < 0.01 1.00E00 1.00E00
regulation of heart rate by chemical signal (GO	0003062) 6 0 .02 - < 0.01 1.00E00 1.00E00
positive regulation of AMPA receptor activity (GO	2000969) 8 0 .03 - < 0.01 1.00E00 1.00E00
protein deglutathionylation (GO	0080058) 1 0 .00 - < 0.01 1.00E00 1.00E00
ventral midline development (GO	0007418) 4 0 .01 - < 0.01 1.00E00 1.00E00
acrosomal vesicle exocytosis (GO	0060478) 6 0 .02 - < 0.01 1.00E00 1.00E00
synapse assembly (GO	0007416) 100 0 .33 - < 0.01 1.00E00 1.00E00
positive regulation of flagellated sperm motility involved in capacitation (GO	0060474) 3 0 .01 - < 0.01 1.00E00 1.00E00
axonal fasciculation (GO	0007413) 20 0 .07 - < 0.01 1.00E00 1.00E00
axon target recognition (GO	0007412) 3 0 .01 - < 0.01 1.00E00 1.00E00
axon guidance (GO	0007411) 278 0 .90 - < 0.01 1.00E00 1.00E00
positive regulation of cytosolic calcium ion concentration involved in egg activation (GO	0060470) 1 0 .00 - < 0.01 1.00E00 1.00E00
hormonal regulation of the force of heart contraction (GO	0003058) 1 0 .00 - < 0.01 1.00E00 1.00E00
regulation of the force of heart contraction by chemical signal (GO	0003057) 5 0 .02 - < 0.01 1.00E00 1.00E00
regulation of vascular associated smooth muscle contraction (GO	0003056) 8 0 .03 - < 0.01 1.00E00 1.00E00
angiotensin-mediated drinking behavior (GO	0003051) 1 0 .00 - < 0.01 1.00E00 1.00E00
regulation of systemic arterial blood pressure by atrial natriuretic peptide (GO	0003050) 2 0 .01 - < 0.01 1.00E00 1.00E00
signal transduction involved in mitotic G2 DNA damage checkpoint (GO	0072434) 1 0 .00 - < 0.01 1.00E00 1.00E00
response to G1 DNA damage checkpoint signaling (GO	0072432) 1 0 .00 - < 0.01 1.00E00 1.00E00
signal transduction involved in mitotic G1 DNA damage checkpoint (GO	0072431) 59 0 .19 - < 0.01 1.00E00 1.00E00
axonogenesis (GO	0007409) 384 0 1.25 - < 0.01 6.39E-01 1.00E00
negative regulation of neuroblast proliferation (GO	0007406) 6 0 .02 - < 0.01 1.00E00 1.00E00
heparan sulfate proteoglycan biosynthetic process, enzymatic modification (GO	0015015) 6 0 .02 - < 0.01 1.00E00 1.00E00
activation of meiosis involved in egg activation (GO	0060466) 1 0 .00 - < 0.01 1.00E00 1.00E00
neuroblast proliferation (GO	0007405) 27 0 .09 - < 0.01 1.00E00 1.00E00
heparan sulfate proteoglycan biosynthetic process, polysaccharide chain biosynthetic process (GO	0015014) 8 0 .03 - < 0.01 1.00E00 1.00E00
pharynx development (GO	0060465) 3 0 .01 - < 0.01 1.00E00 1.00E00
glial cell fate determination (GO	0007403) 1 0 .00 - < 0.01 1.00E00 1.00E00
lung lobe morphogenesis (GO	0060463) 7 0 .02 - < 0.01 1.00E00 1.00E00
lung lobe development (GO	0060462) 7 0 .02 - < 0.01 1.00E00 1.00E00
right lung morphogenesis (GO	0060461) 1 0 .00 - < 0.01 1.00E00 1.00E00
neuroblast fate determination (GO	0007400) 1 0 .00 - < 0.01 1.00E00 1.00E00
left lung morphogenesis (GO	0060460) 1 0 .00 - < 0.01 1.00E00 1.00E00
regulation of systemic arterial blood pressure mediated by a chemical signal (GO	0003044) 44 0 .14 - < 0.01 1.00E00 1.00E00
phenol-containing compound biosynthetic process (GO	0046189) 34 0 .11 - < 0.01 1.00E00 1.00E00
response to intra-S DNA damage checkpoint signaling (GO	0072429) 4 0 .01 - < 0.01 1.00E00 1.00E00
aldehyde biosynthetic process (GO	0046184) 8 0 .03 - < 0.01 1.00E00 1.00E00
signal transduction involved in intra-S DNA damage checkpoint (GO	0072428) 1 0 .00 - < 0.01 1.00E00 1.00E00
signal transduction involved in G2 DNA damage checkpoint (GO	0072425) 12 0 .04 - < 0.01 1.00E00 1.00E00
response to nitrite (GO	0080033) 1 0 .00 - < 0.01 1.00E00 1.00E00
response to DNA damage checkpoint signaling (GO	0072423) 7 0 .02 - < 0.01 1.00E00 1.00E00
signal transduction involved in DNA damage checkpoint (GO	0072422) 73 0 .24 - < 0.01 1.00E00 1.00E00
detection of DNA damage stimulus involved in DNA damage checkpoint (GO	0072421) 1 0 .00 - < 0.01 1.00E00 1.00E00
left lung development (GO	0060459) 2 0 .01 - < 0.01 1.00E00 1.00E00
right lung development (GO	0060458) 2 0 .01 - < 0.01 1.00E00 1.00E00
negative regulation of digestive system process (GO	0060457) 17 0 .06 - < 0.01 1.00E00 1.00E00
[truncated: 13,782 more rows]

[truncated: 5 more sheets: Molecular Function, Cellular component, control vs HIV-1 Tat, control vs cocaine, control vs TC]
